# Supplementary material for: Virus Genomes from Deep Sea Sediments Expand the Ocean Megavirome and Support Independent Origins of Viral Gigantism
Source: PubMed Central journal article supplement (PMC6401483; doi:10.1128/mbio.02497-18), 2019-03-05

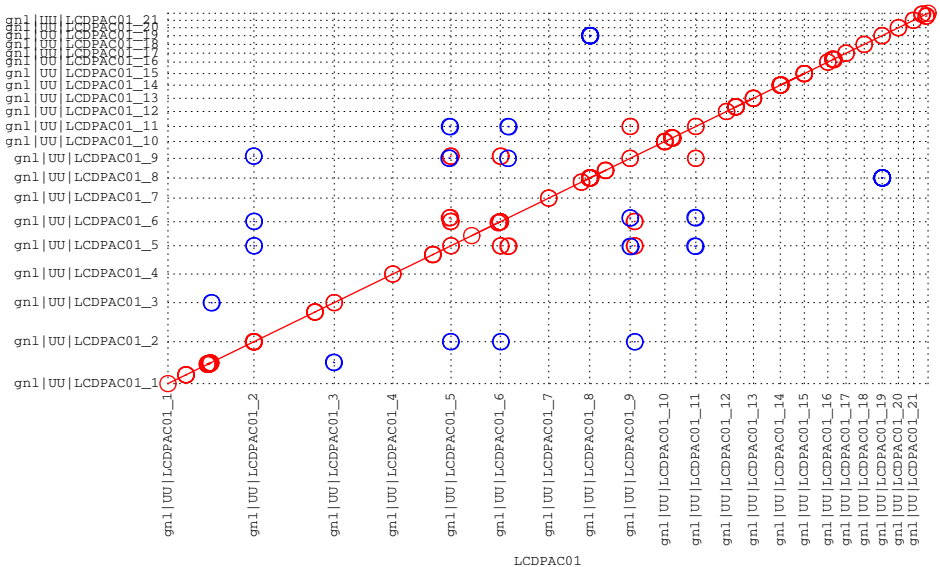

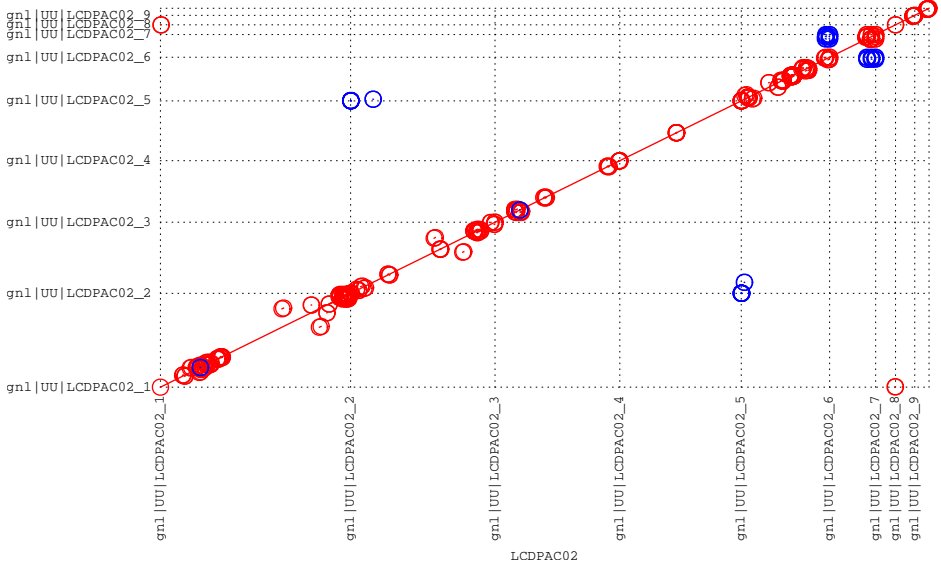

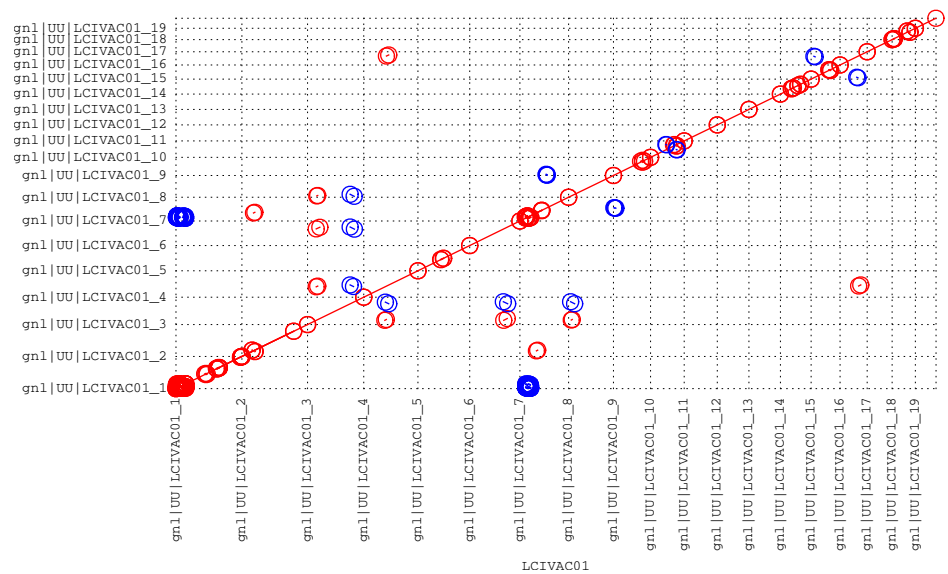

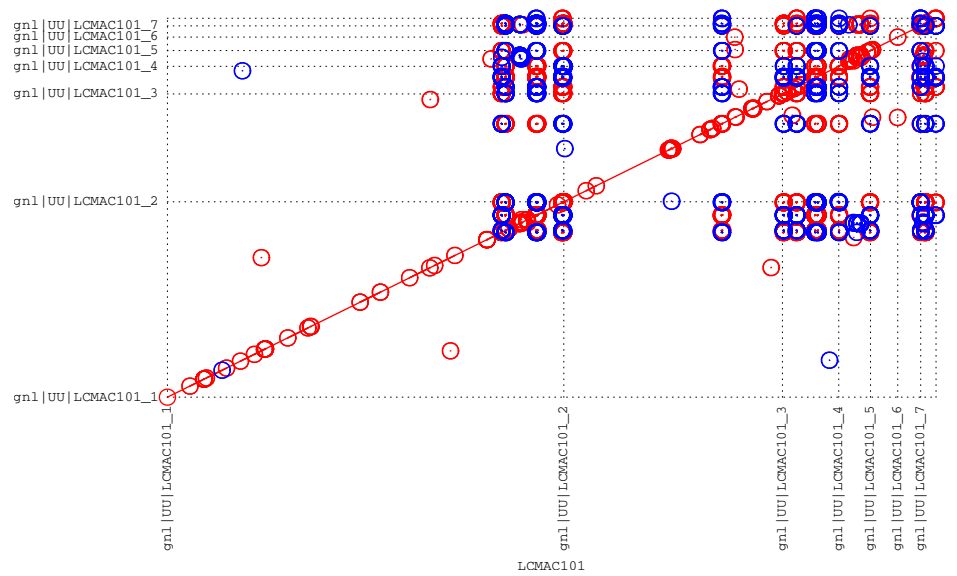

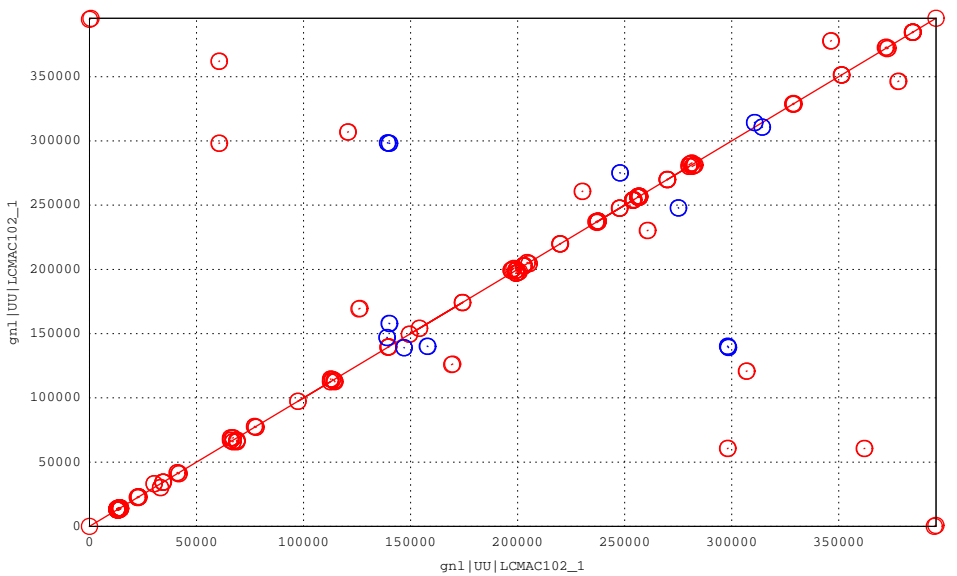



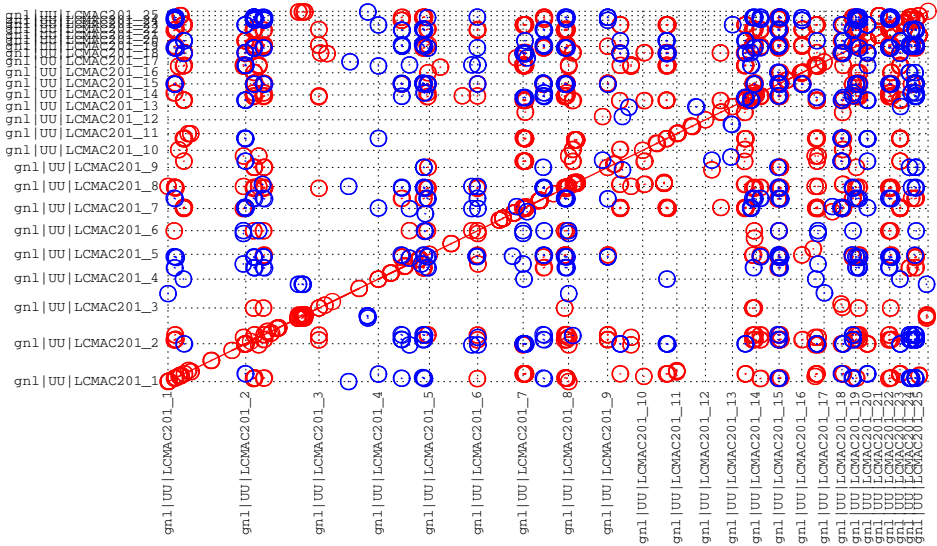

LCMAC201

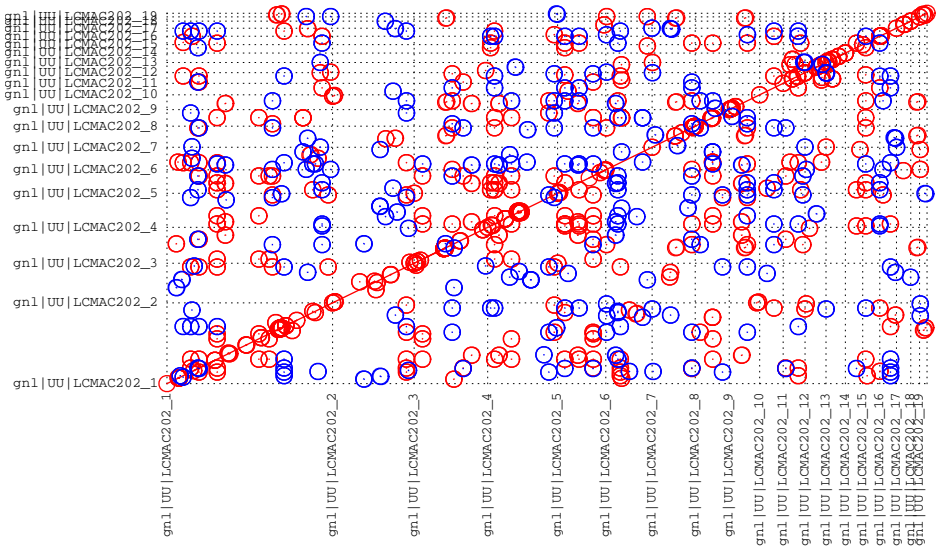

LCMAC202



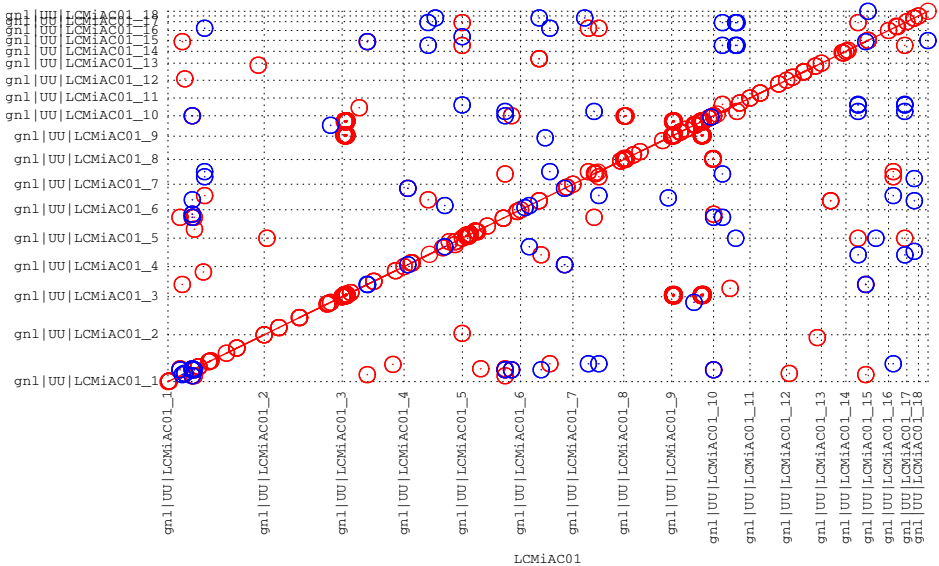

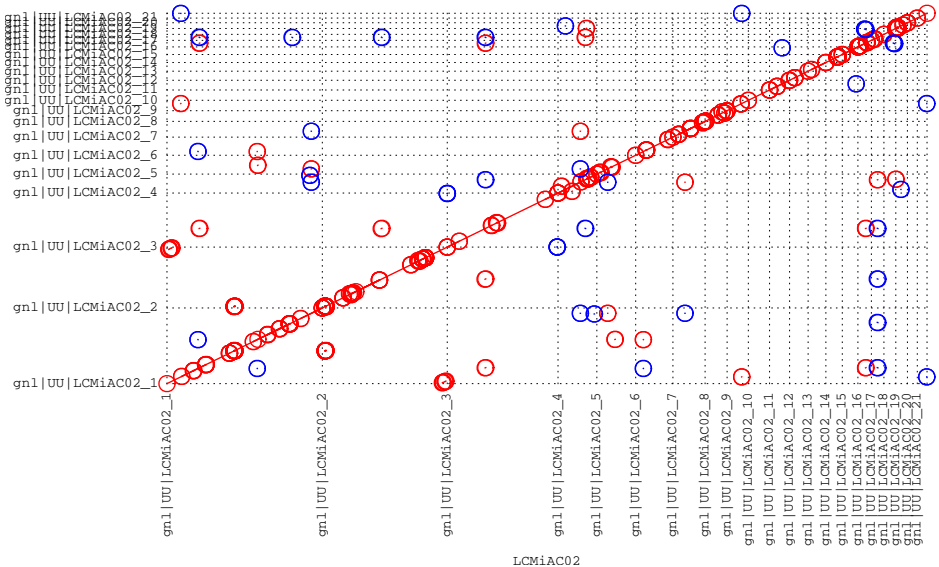

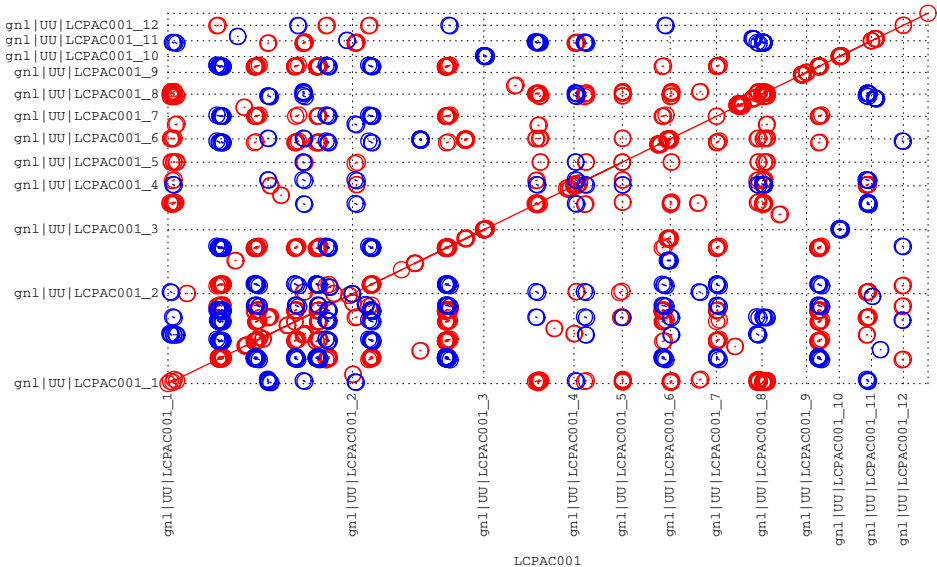



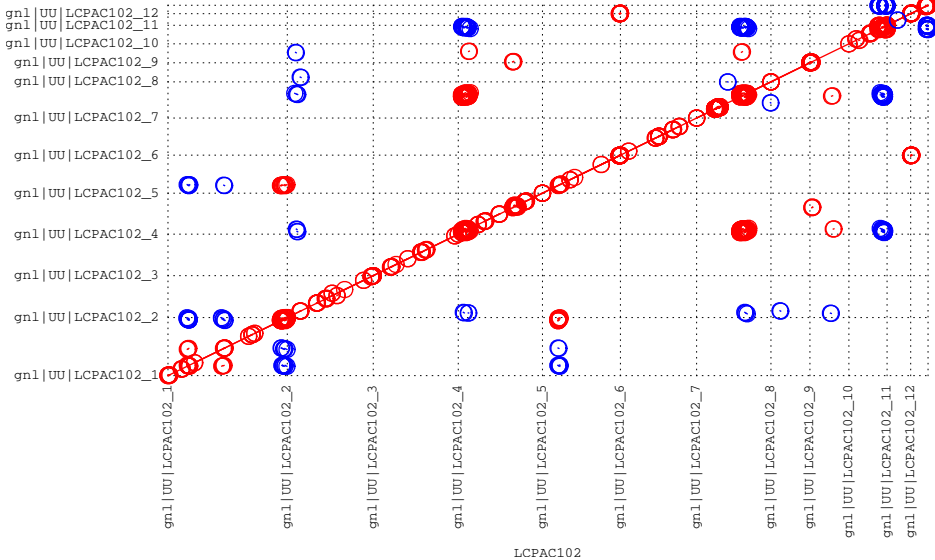



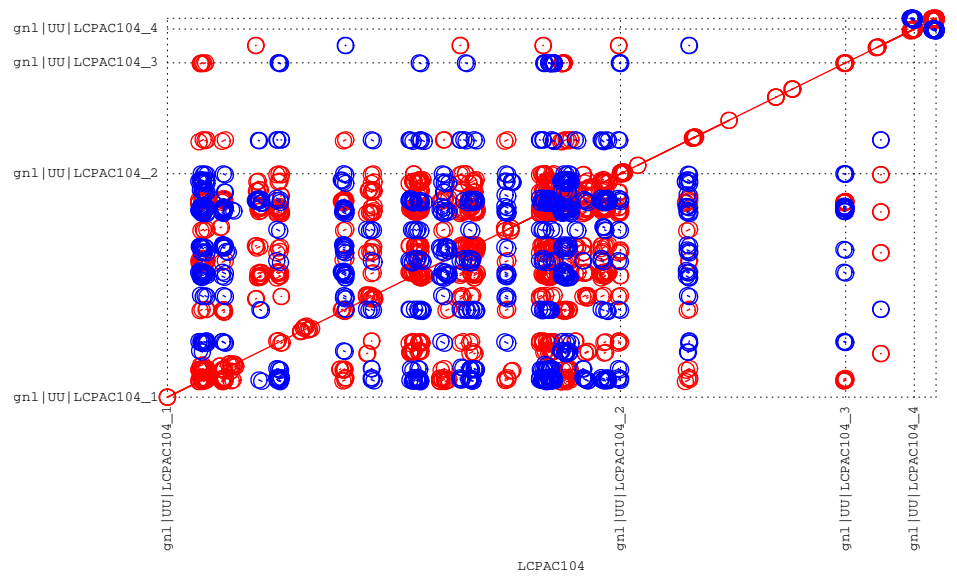

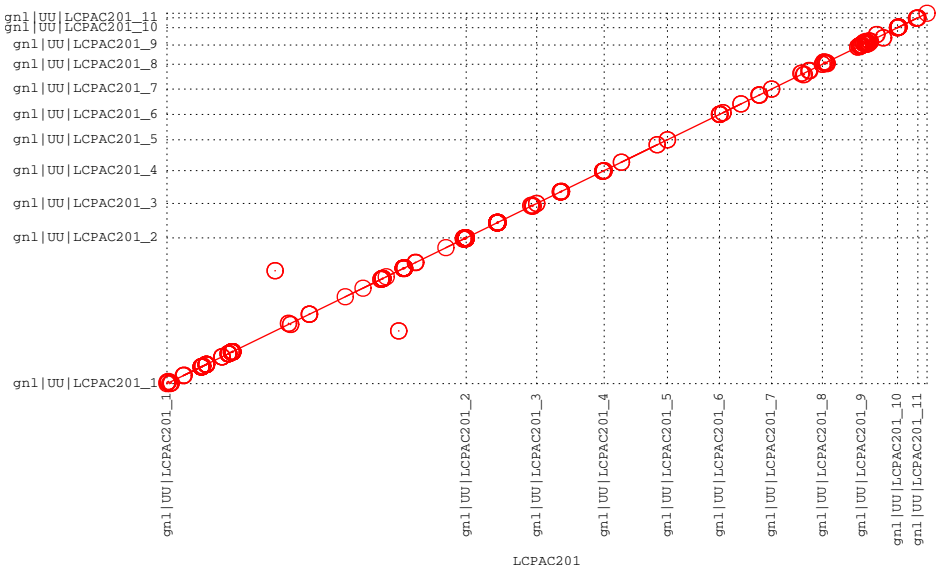



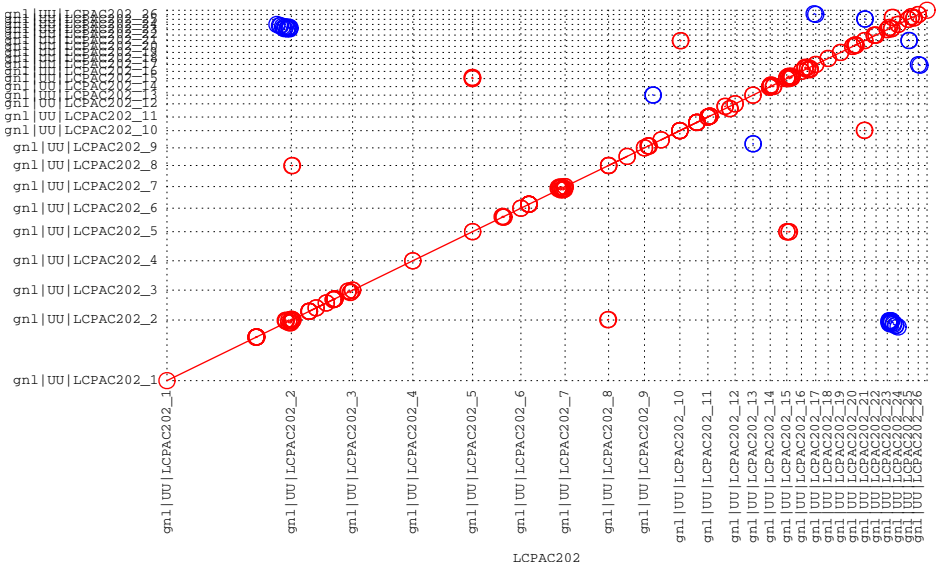

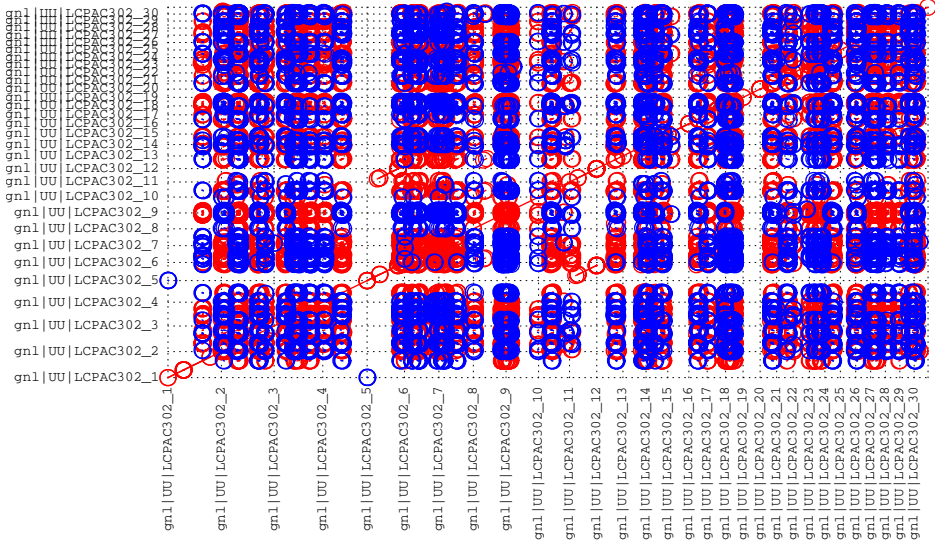

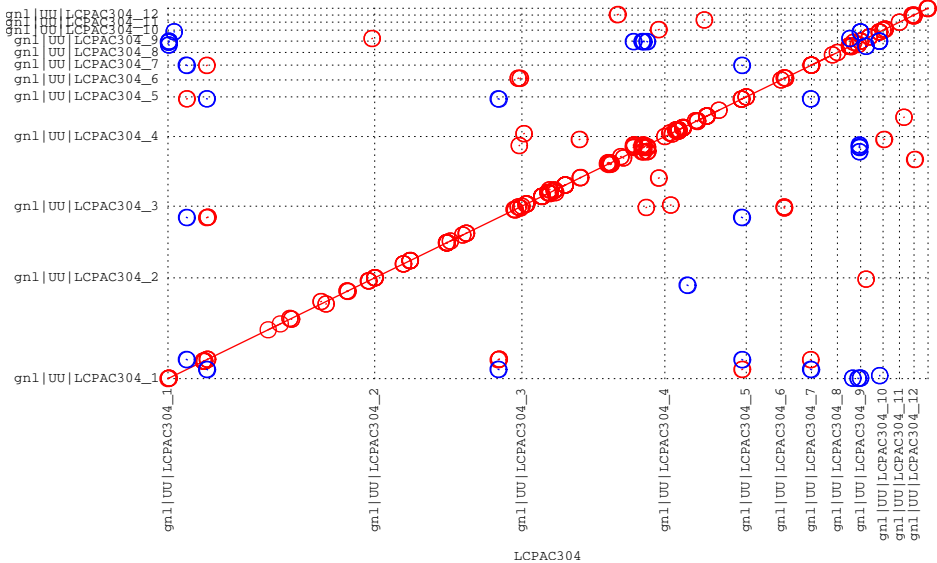

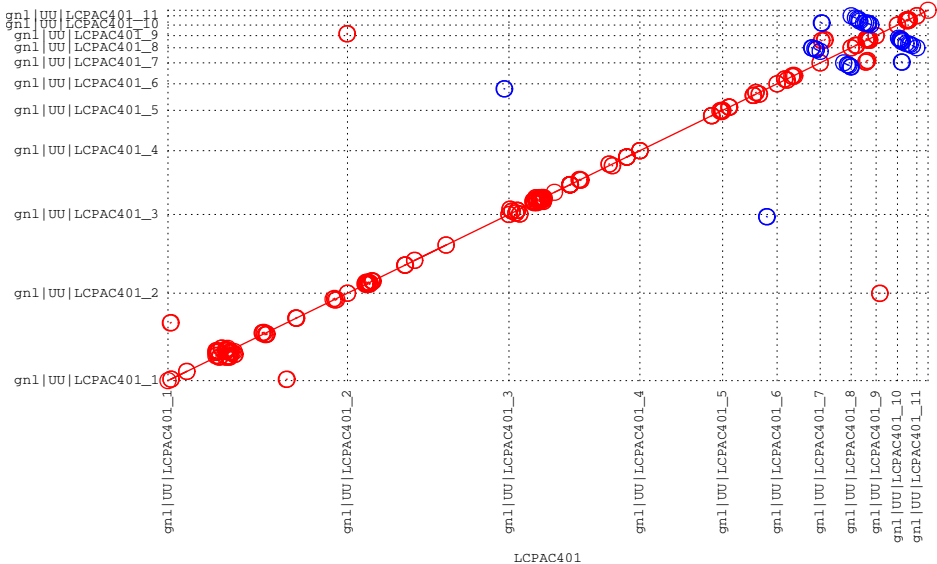

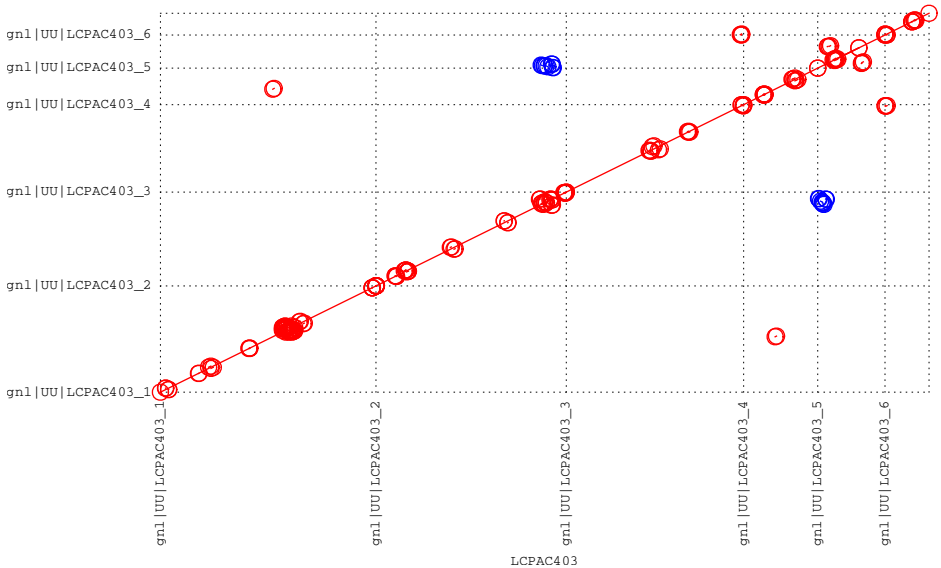

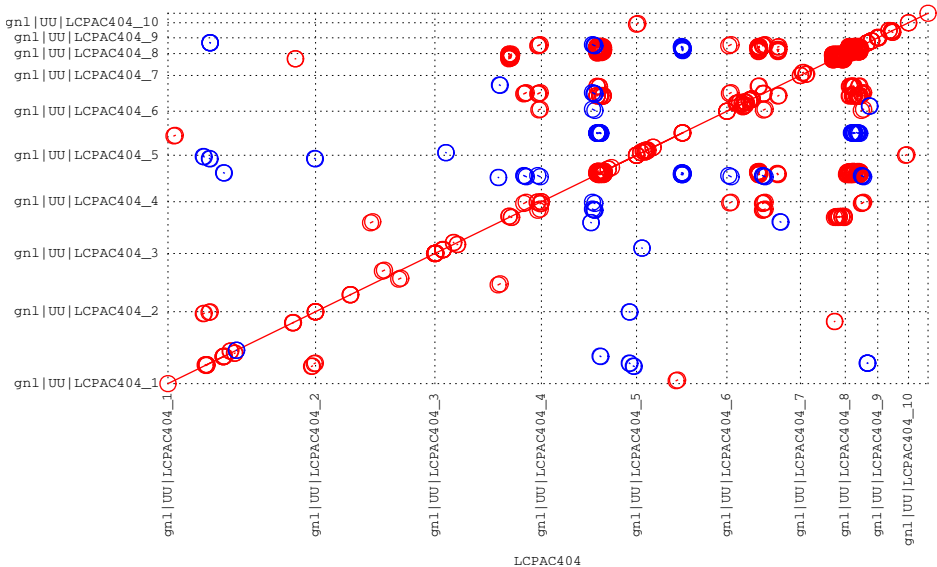

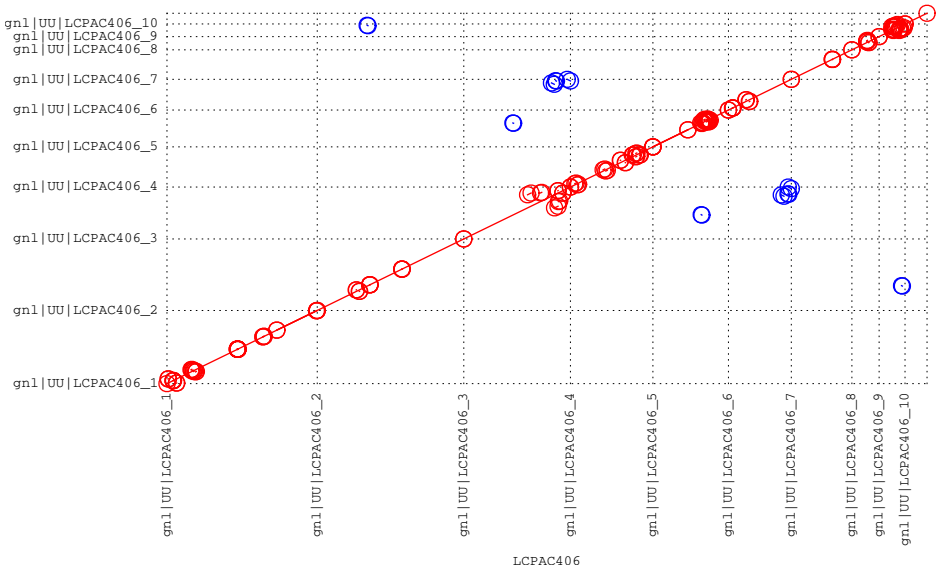

Supplement: mBio.02497-18-s0004.pdf [file mBio.02497-18-s0004.pdf]
