# Supplementary material for: Virus Genomes from Deep Sea Sediments Expand the Ocean Megavirome and Support Independent Origins of Viral Gigantism
Source: PubMed Central journal article supplement (PMC6401483; doi:10.1128/mbio.02497-18), 2019-03-05

This file contains meme motif search results for Loki Castle Viruses of Mimivirus group, and for Loki Castle Virophages

The 'upstream' regions are from -250 to 30 nt related to the start codon; the regions shorter than 50 nt are filtered out

Meme search was set to 25 nt of motif width

Upstream region sequences and meme output files can be found at:  
[ftp://ftp.ncbi.nih.gov/pub/yutinn/Loki\\_Castle\\_NCLDV\\_2018/meme\\_motif\\_search](ftp://ftp.ncbi.nih.gov/pub/yutinn/Loki_Castle_NCLDV_2018/meme_motif_search)

Conserved motifs AAA(T/A)TGA are marked with the 'sun' sign  
Conserved AT-rich motifs are marked with the 'moon' sign

*note: on all Logo images, the detected motif starts from position #11*

# LCMiAC01, LCMiAC02

1130 fragments

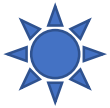

## Motif #3 (399 sites)

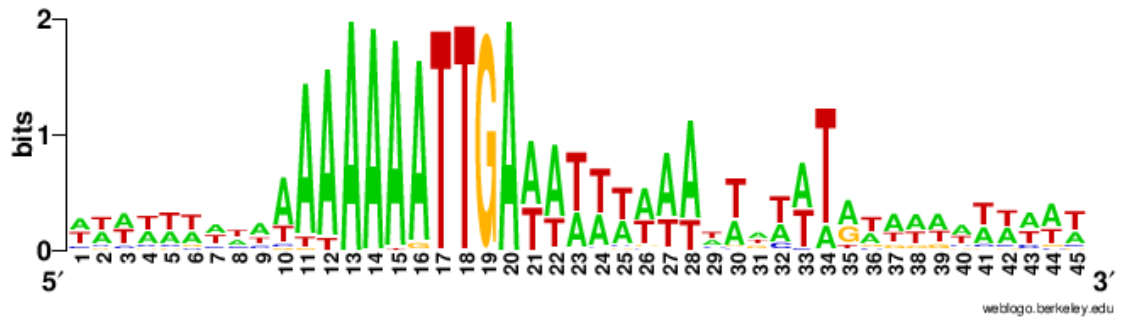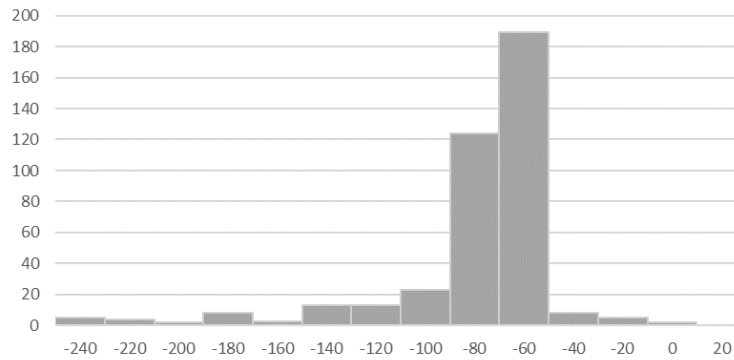

## Motif #4 (425 sites)

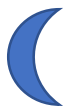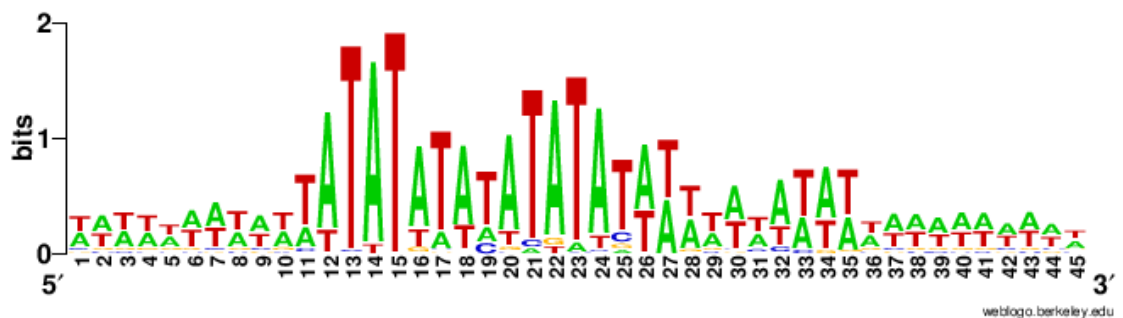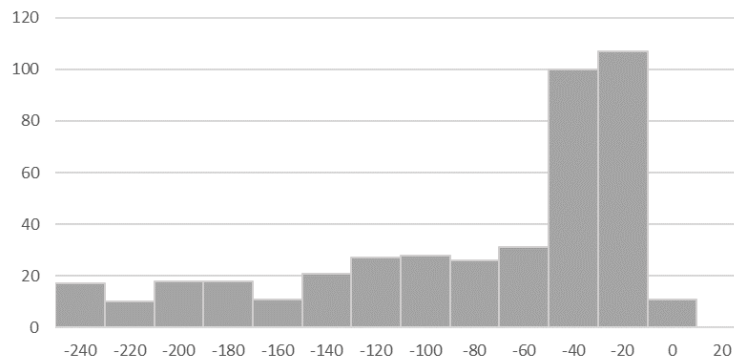

# LCMiAC01

566 fragments

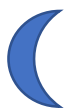

## Motif #2 (437 sites)

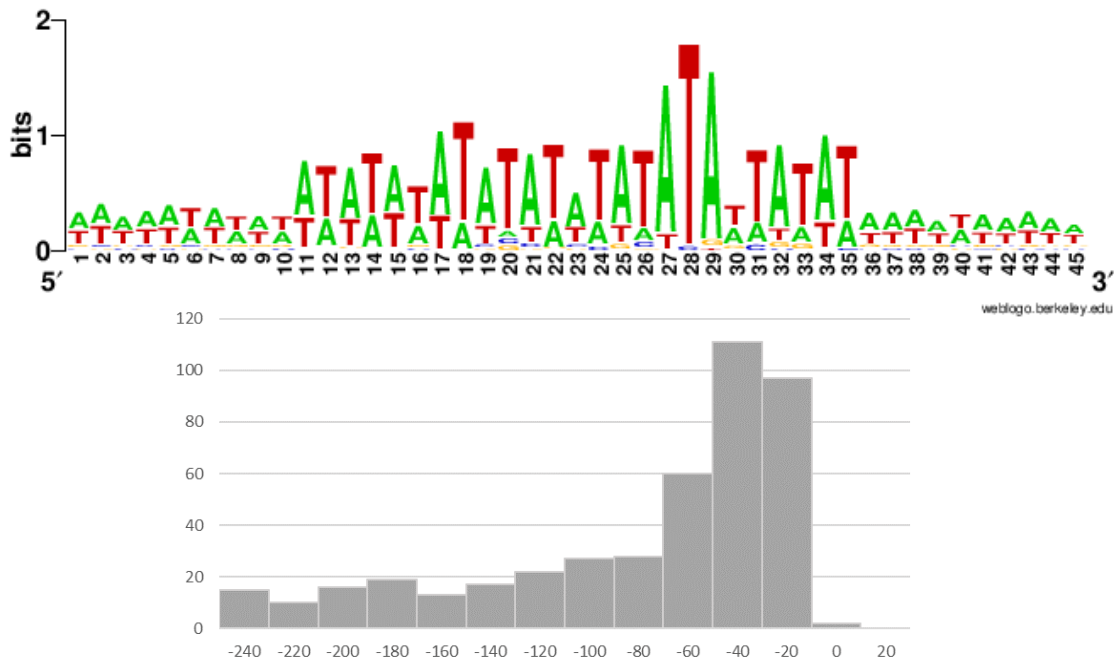

# LCMiAC02

564 fragments

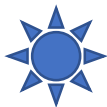

## Motif #1 (223 sites)

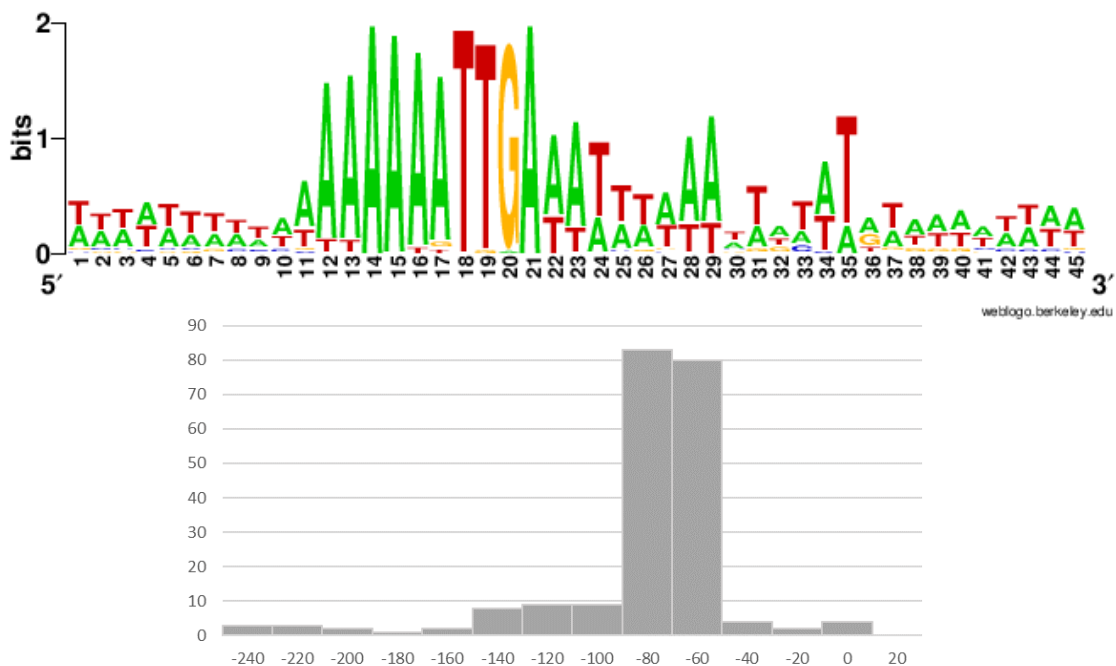



# Viro 1368 and viro 852 conserved motifs vs MiAC upstream regions (by FIMO)

## Viro 1368

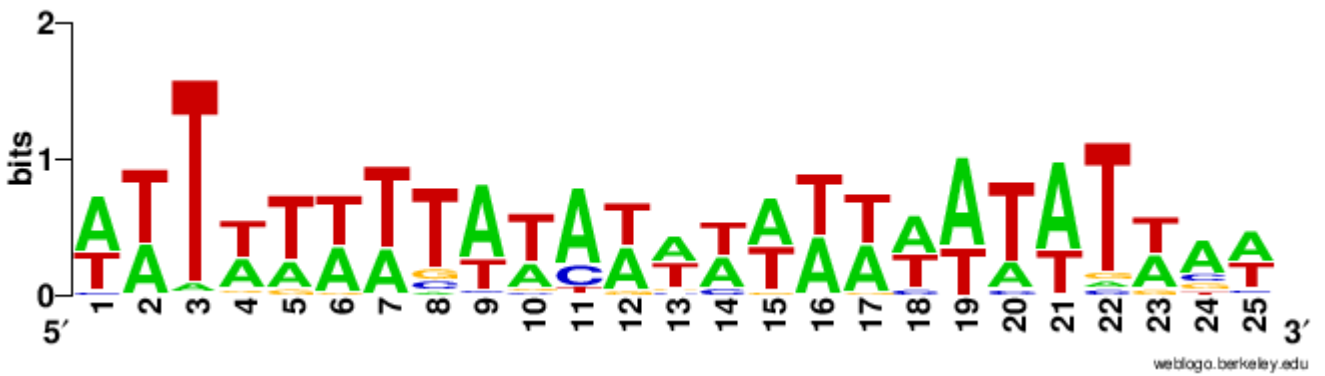

## Viro 852

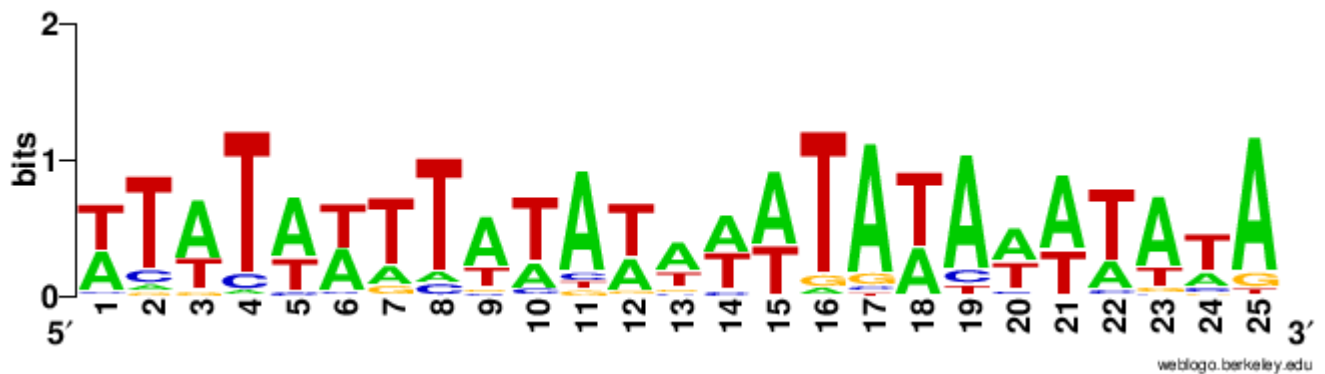

Supplement: mBio.02497-18-s0006.pdf [file mBio.02497-18-s0006.pdf]
