# Supplementary material for: Virus Genomes from Deep Sea Sediments Expand the Ocean Megavirome and Support Independent Origins of Viral Gigantism
Source: PubMed Central journal article supplement (PMC6401483; doi:10.1128/mbio.02497-18), 2019-03-05

This file contains meme motif search results for Loki Castle Viruses of Marseillevirus and Iridovirus groups

Marseillevirus marseillevirus (NC\_013756.1) is included

The 'upstream' regions are from -250 to 30 nt related to the start codon; the regions shorter than 50 nt are filtered out

Meme search was set to 25 nt of motif width

Upstream region sequences and meme output files can be found at:  
[ftp://ftp.ncbi.nih.gov/pub/yutin/Loki\\_Castle\\_NCLDV\\_2018/meme\\_motif\\_search](ftp://ftp.ncbi.nih.gov/pub/yutin/Loki_Castle_NCLDV_2018/meme_motif_search)

Conserved motifs AAA(T/A)TGA are marked with the 'sun' sign  
Conserved AT-rich motifs are marked with the 'moon' sign

*note: on all Logo images, the detected motif starts from position #11*



# LCMAC201

550 fragments

## Motif #3 (85 sites)

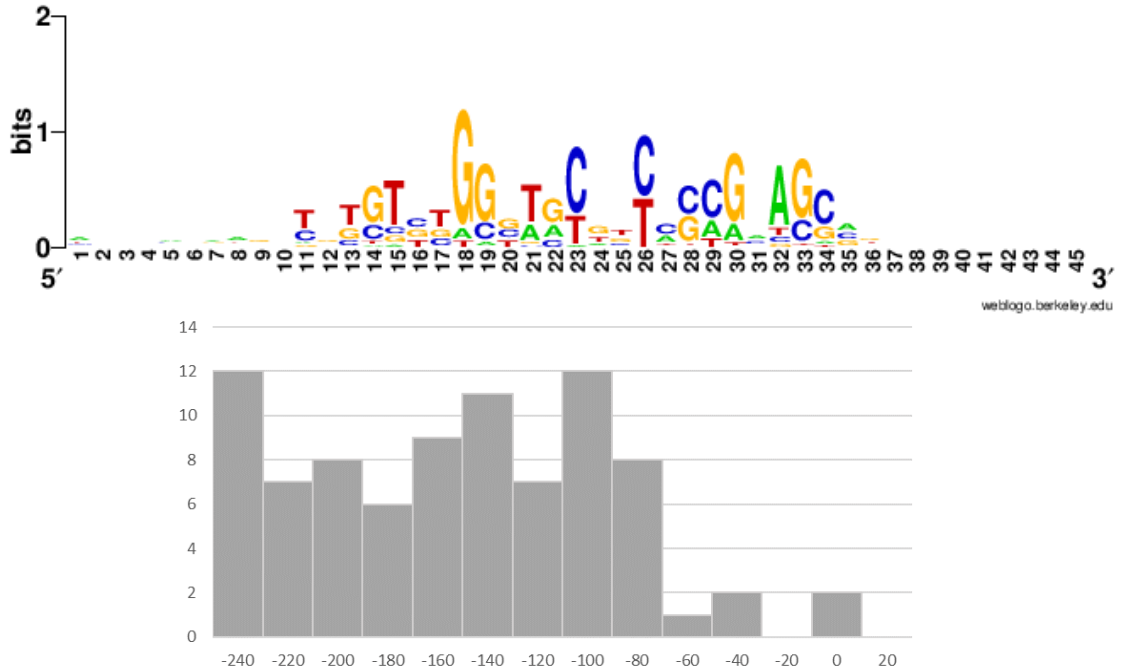

## Motif #4 (60 sites)

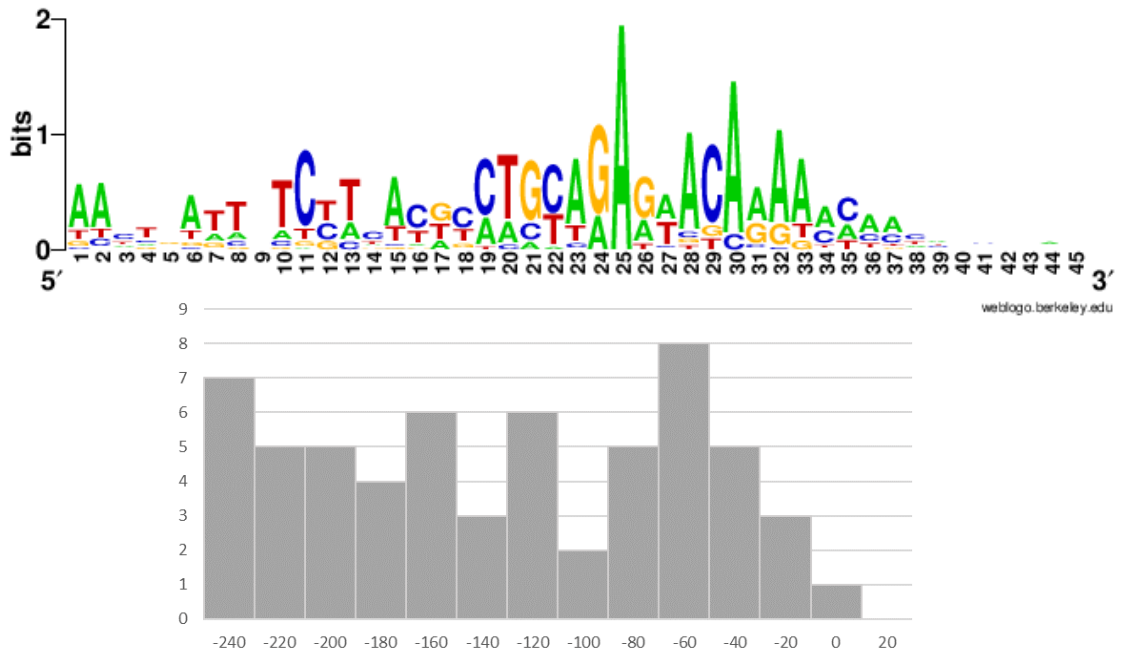

# LCMAC202

658 fragments

## Motif #1 (108 sites)

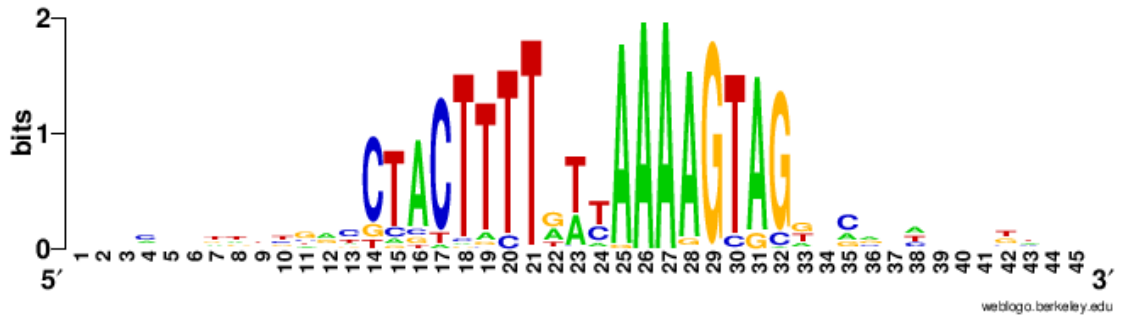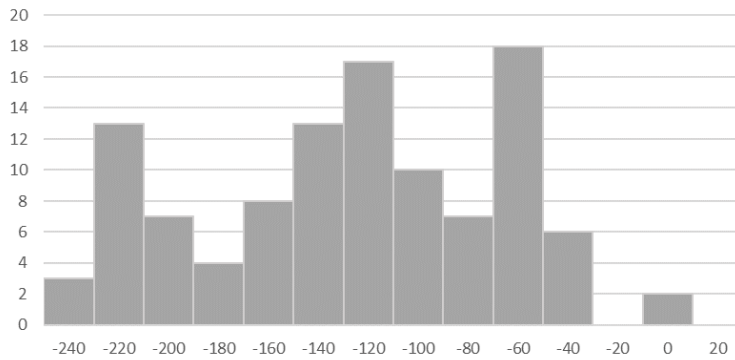

## Motif #2 (87 sites)

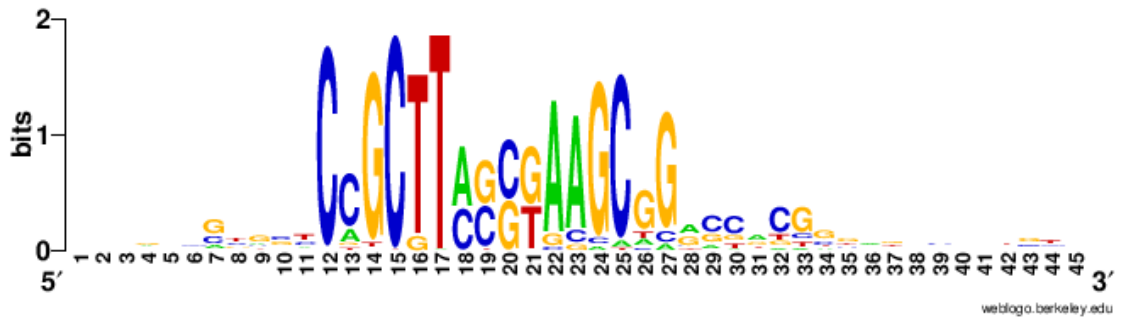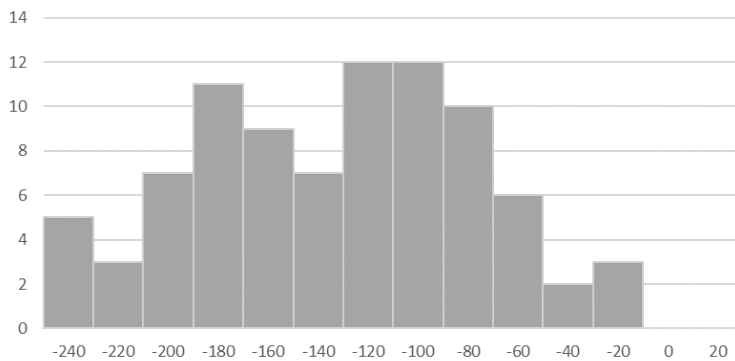

# LCMAC202

658 fragments

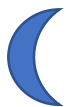

## Motif #3 (174 sites)

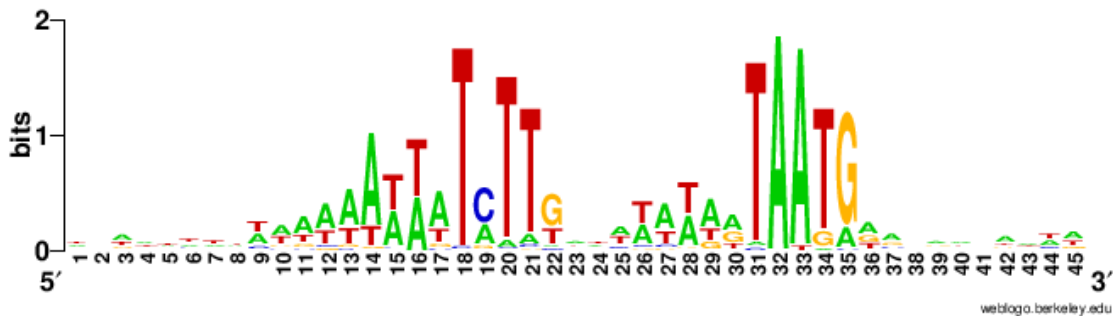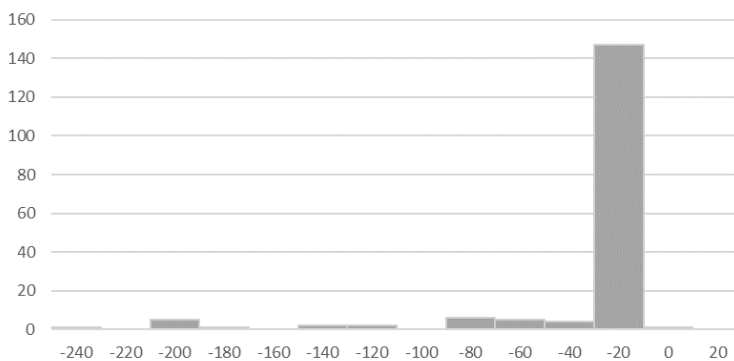

## Motif #5 (200 sites)

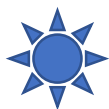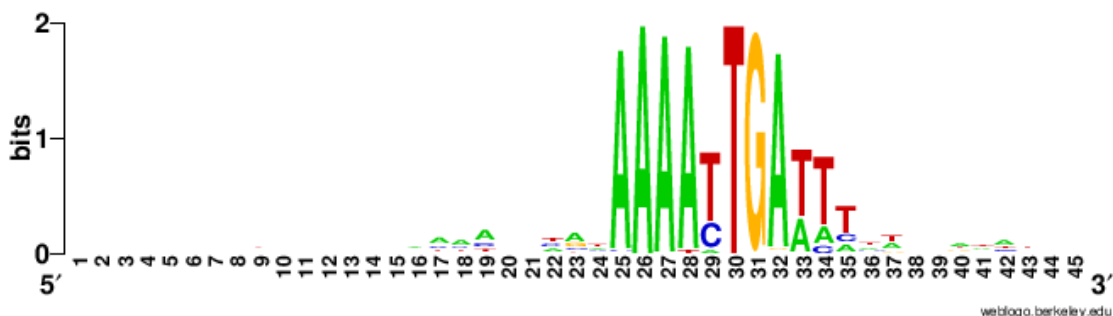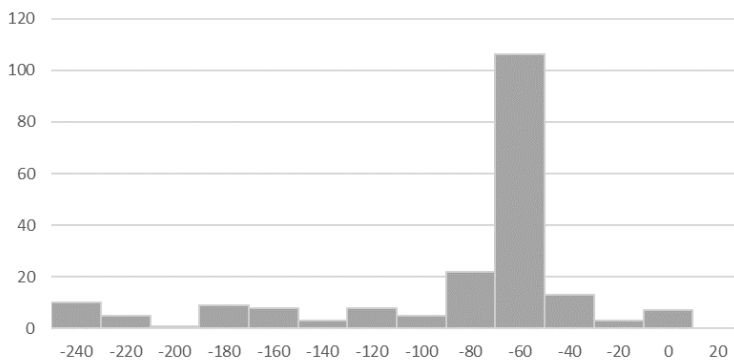

# LCMAC101

772 fragments

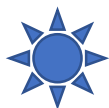

## Motif #1 (258 sites)

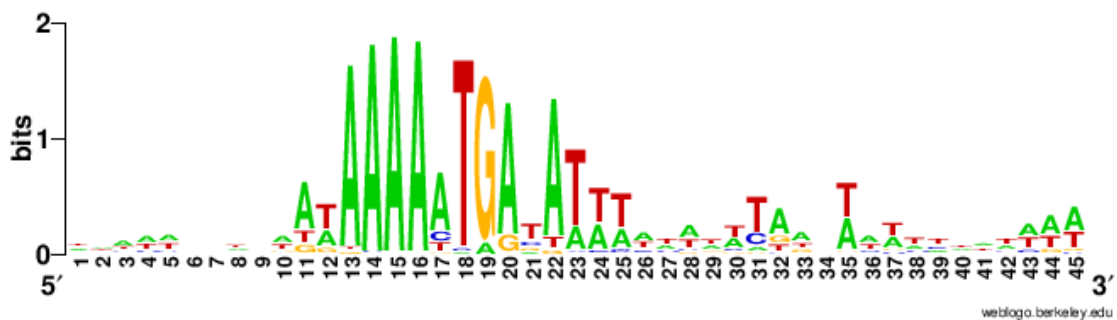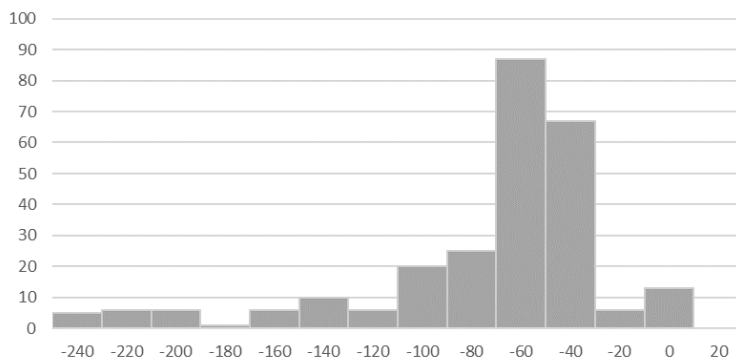

## Motif #2 (159 sites)

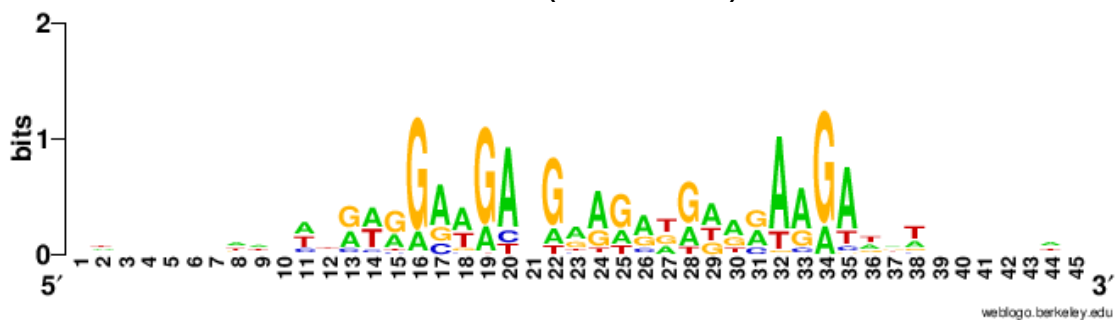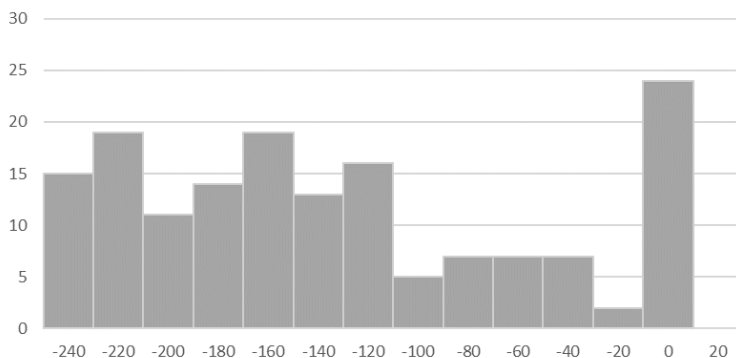

# LCMAC102

464 fragments

## Motif #1 (208 sites)

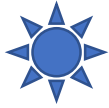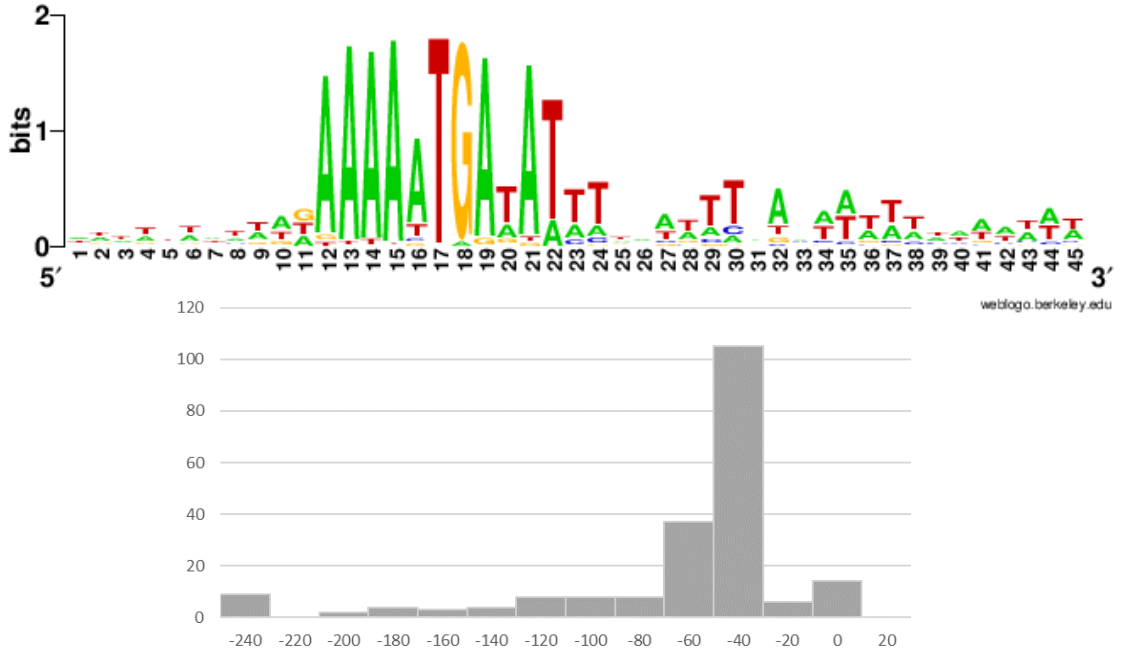

## Motif #2 (81 sites)

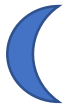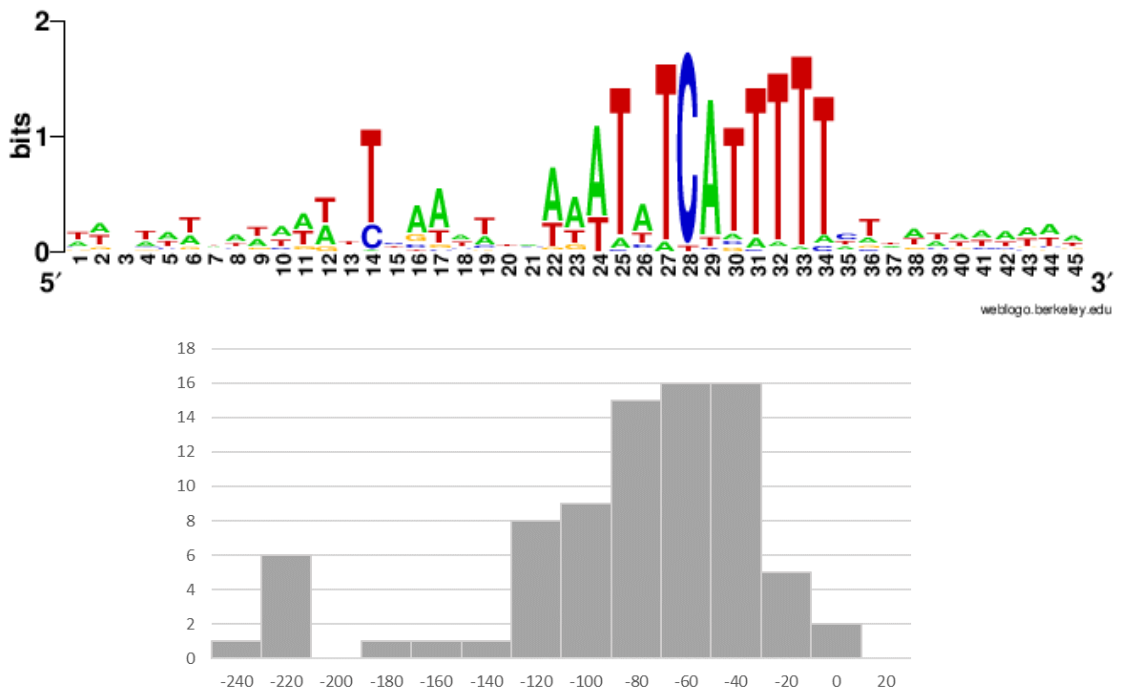

# LCMAC103

422 fragments

Motif #1 (218 sites)

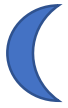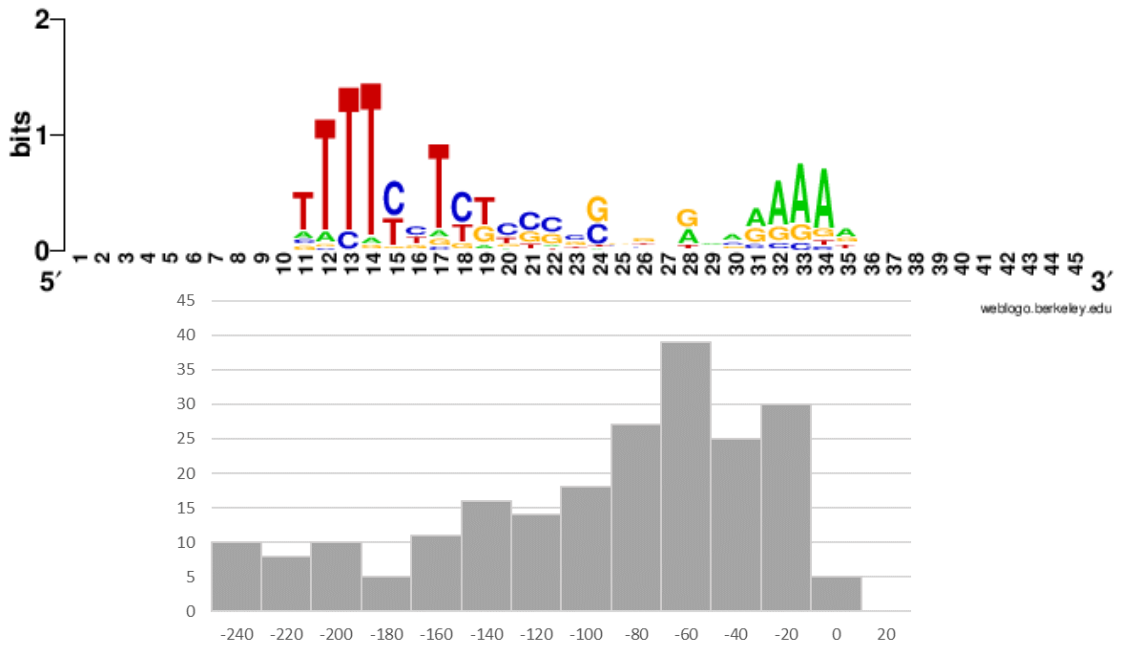

Motif #2 (192 sites)

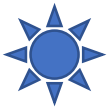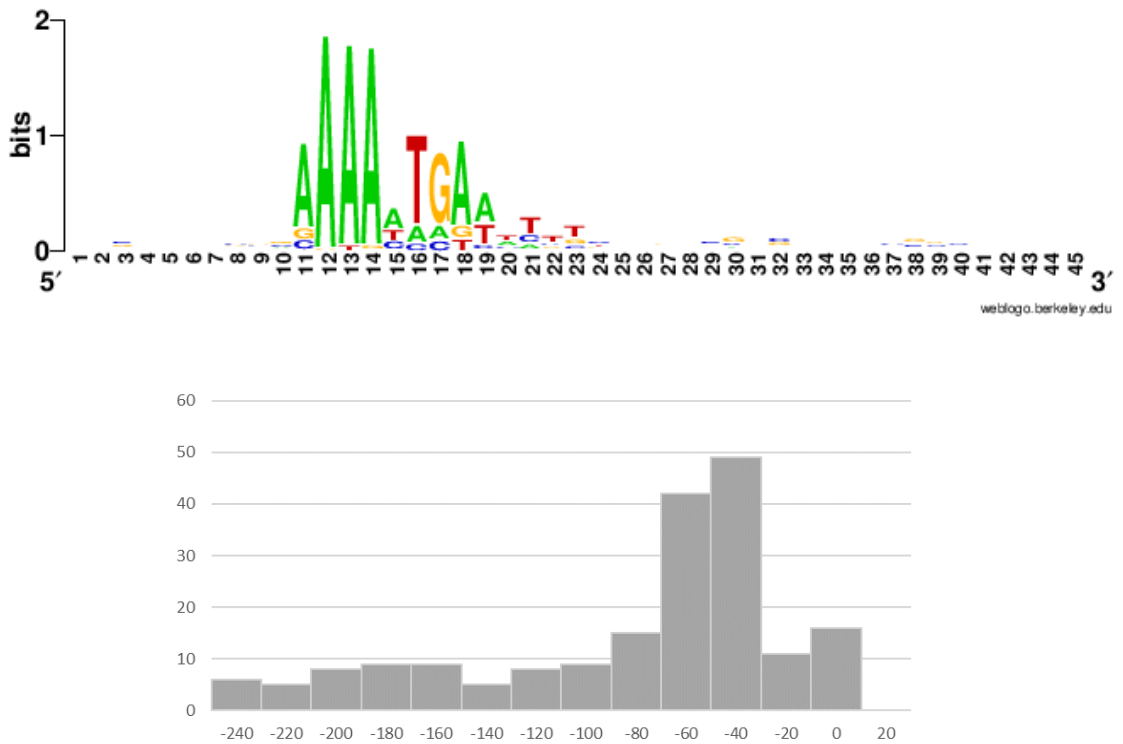



# Marseillevirus marseillevirus

428 fragments



## Motif #1 (305 sites)

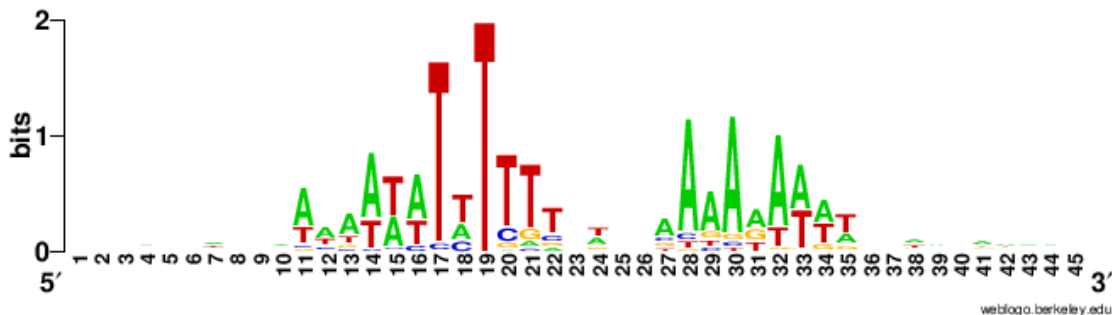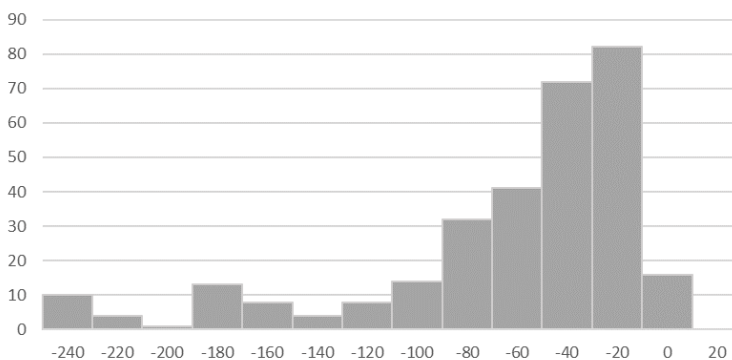

## Motif #2 (426 sites)

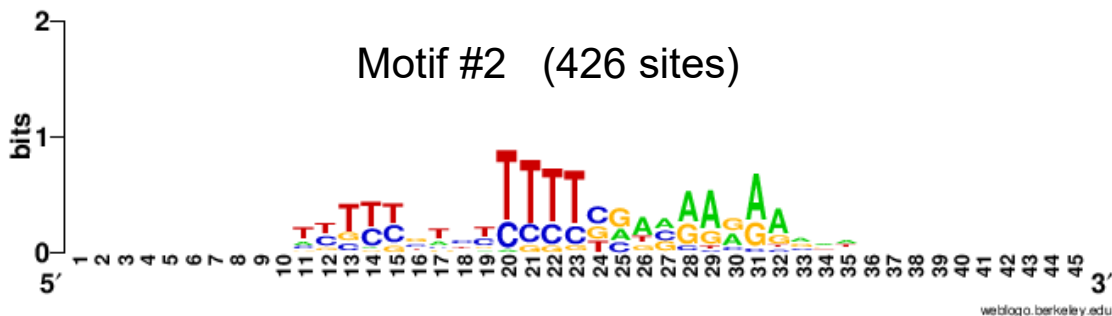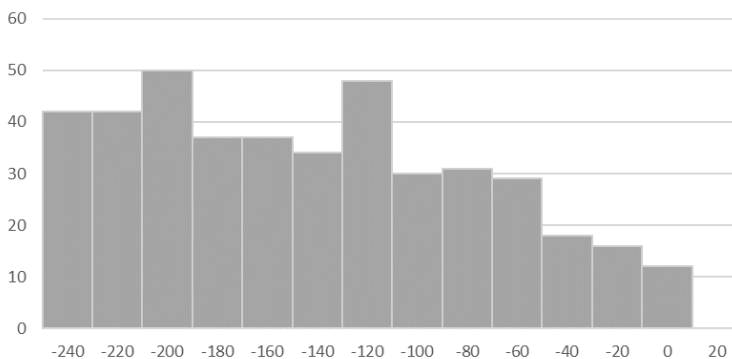



# Marseillevirus marseillevirus

428 fragments

## Motif #5 (122 sites)

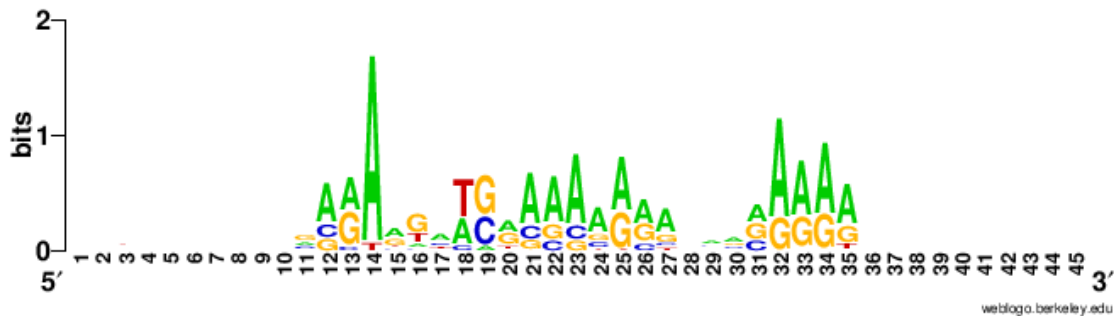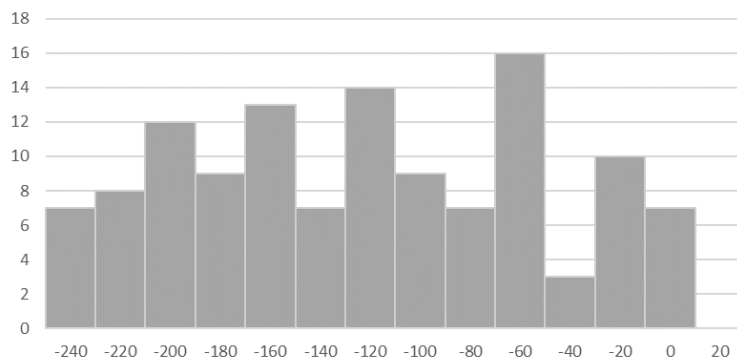

## Motif #6 (129 sites)

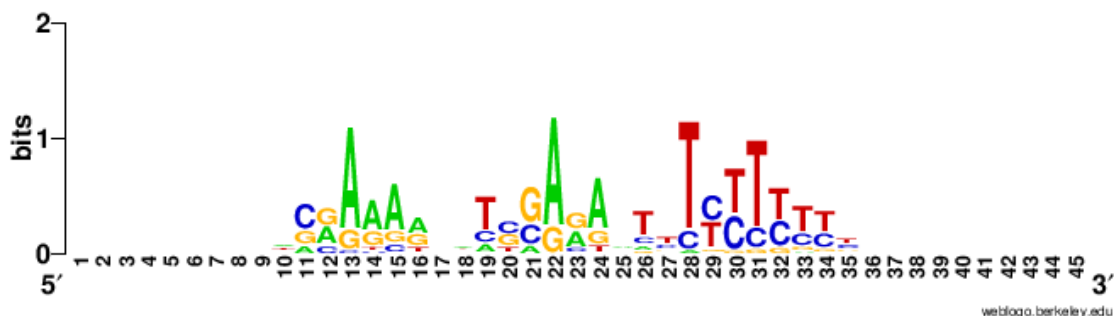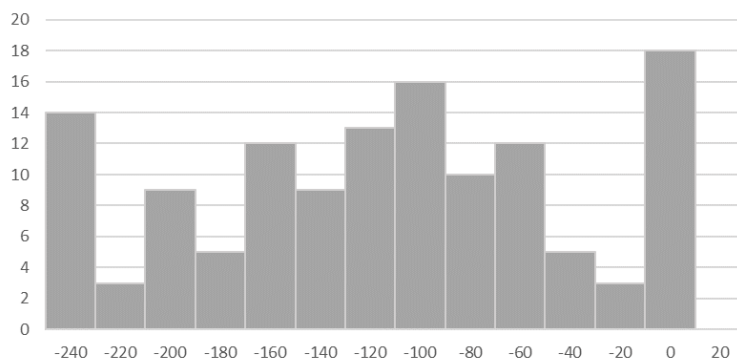

# LCIVAC

211 fragments

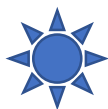

## Motif #1 (76 sites)

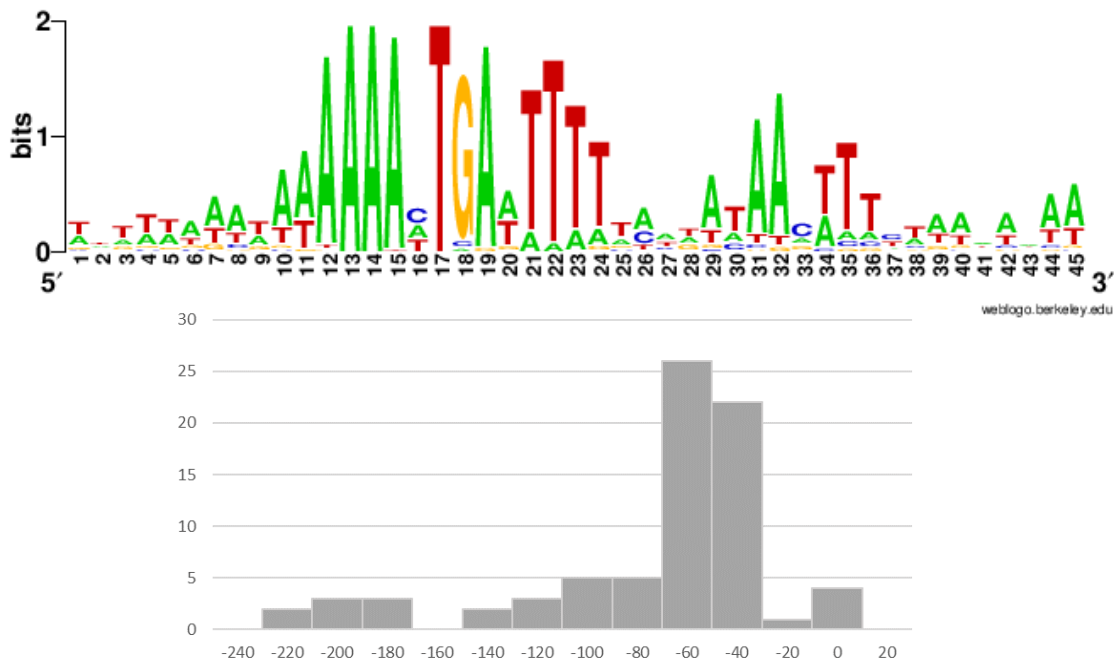

## Motif #3 (55 sites)

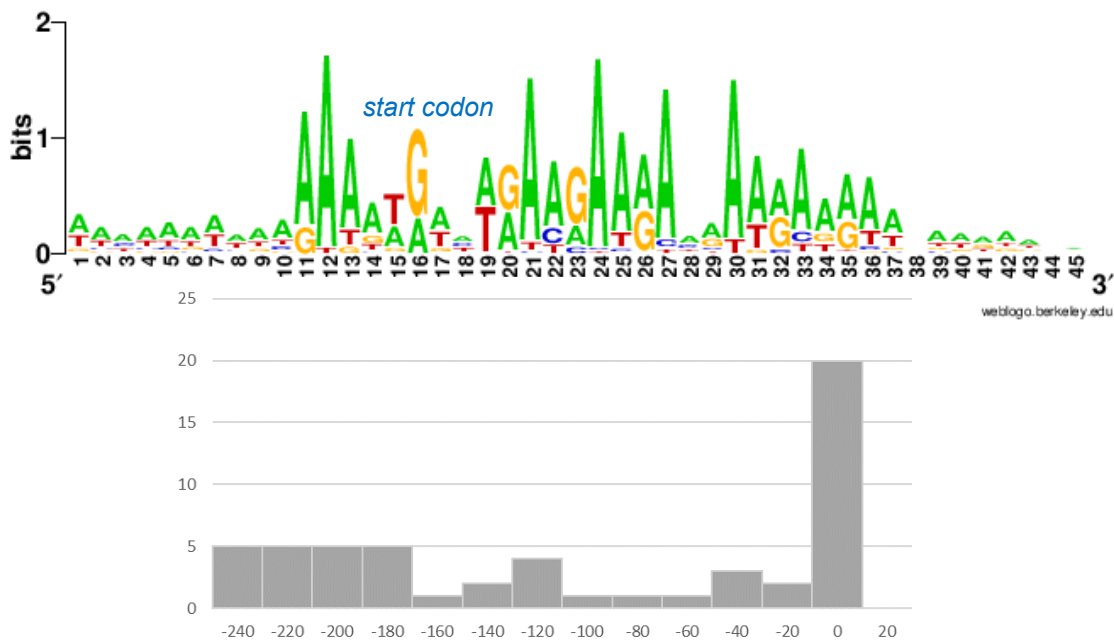

Supplement: mBio.02497-18-s0008.pdf [file mBio.02497-18-s0008.pdf]
