# Supplementary material for: Virus Genomes from Deep Sea Sediments Expand the Ocean Megavirome and Support Independent Origins of Viral Gigantism
Source: PubMed Central journal article supplement (PMC6401483; doi:10.1128/mbio.02497-18), 2019-03-05
Supplement: mBio.02497-18-s0002.pdf [file mBio.02497-18-s0002.pdf]

This file contains trees for conserved proteins used for the concatenated tree shown on Figure 2 (namely, DNA polymerase, major capsid protein, and A18-like helicase), and trees for translation proteins found in Loki Castle virus (LCV) genomes.

LCV translation proteins are marked with the star whenever at least one bona-fide NCLDV protein was found on the same contig as the translation protein (see the last two slides for the details).

The multiple sequence alignments and the trees in Newick format could be downloaded from here:

[ftp://ftp.ncbi.nih.gov/pub/yutin/Loki\\_Castle\\_NCLDV\\_2018/MCP\\_DNAp\\_A18hel\\_aln\\_trees/](ftp://ftp.ncbi.nih.gov/pub/yutin/Loki_Castle_NCLDV_2018/MCP_DNAp_A18hel_aln_trees/)

[ftp://ftp.ncbi.nih.gov/pub/yutin/Loki\\_Castle\\_NCLDV\\_2018/trans\\_aln\\_trees/](ftp://ftp.ncbi.nih.gov/pub/yutin/Loki_Castle_NCLDV_2018/trans_aln_trees/)

# DNAp

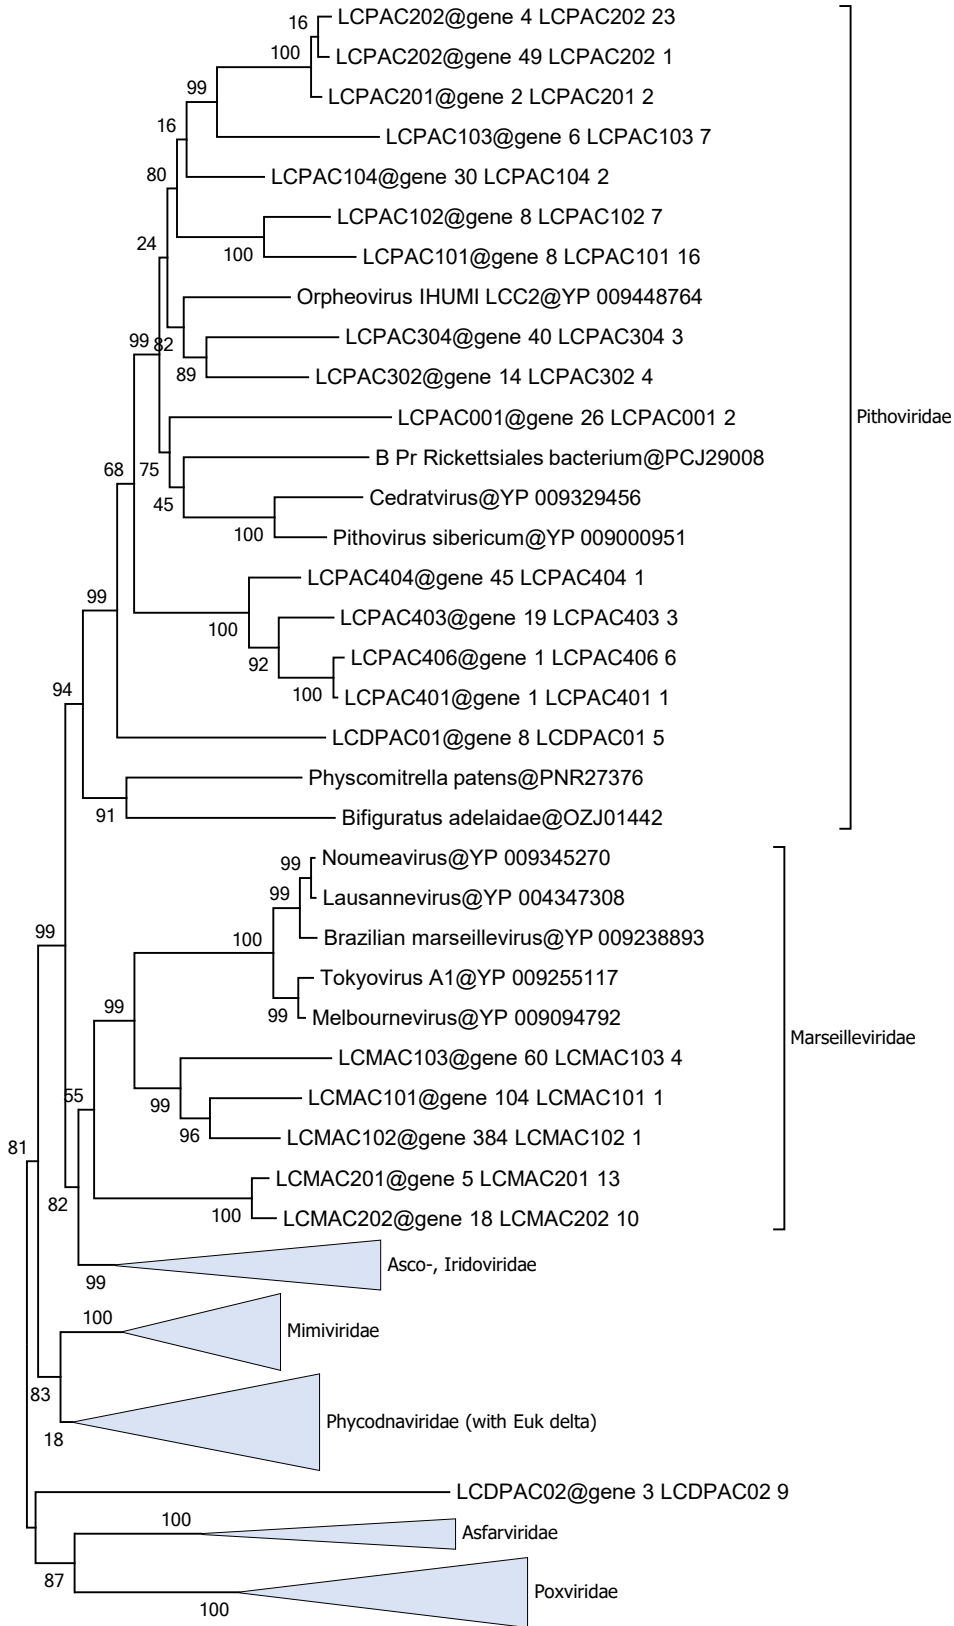

# MCP

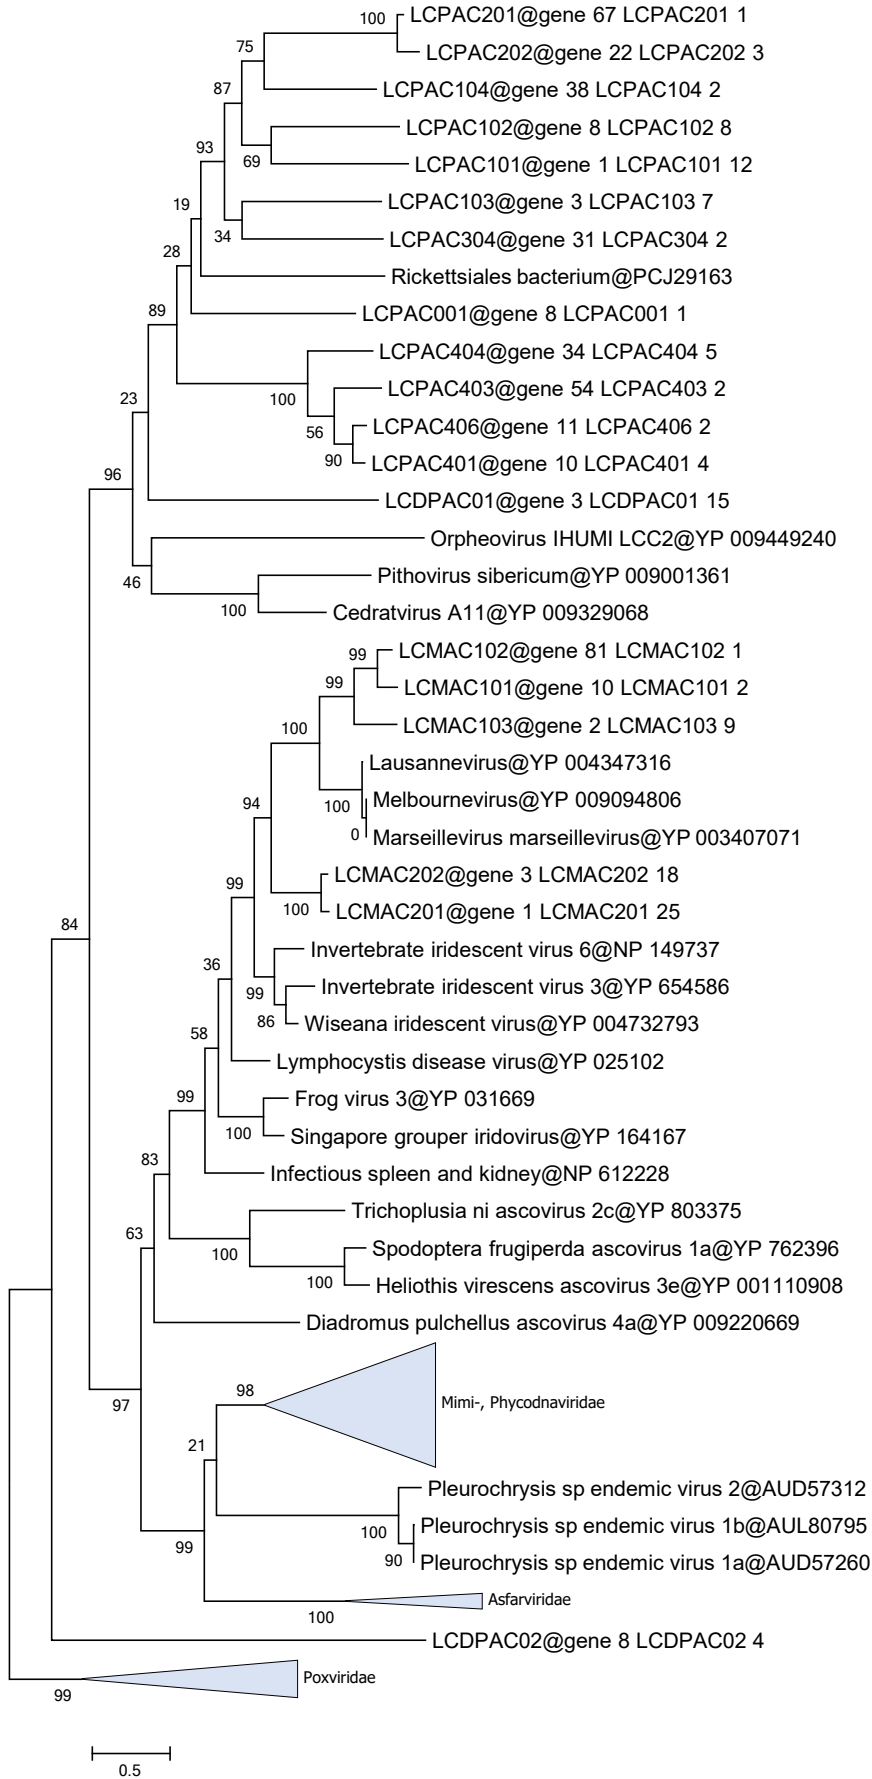

# A18-like helicase

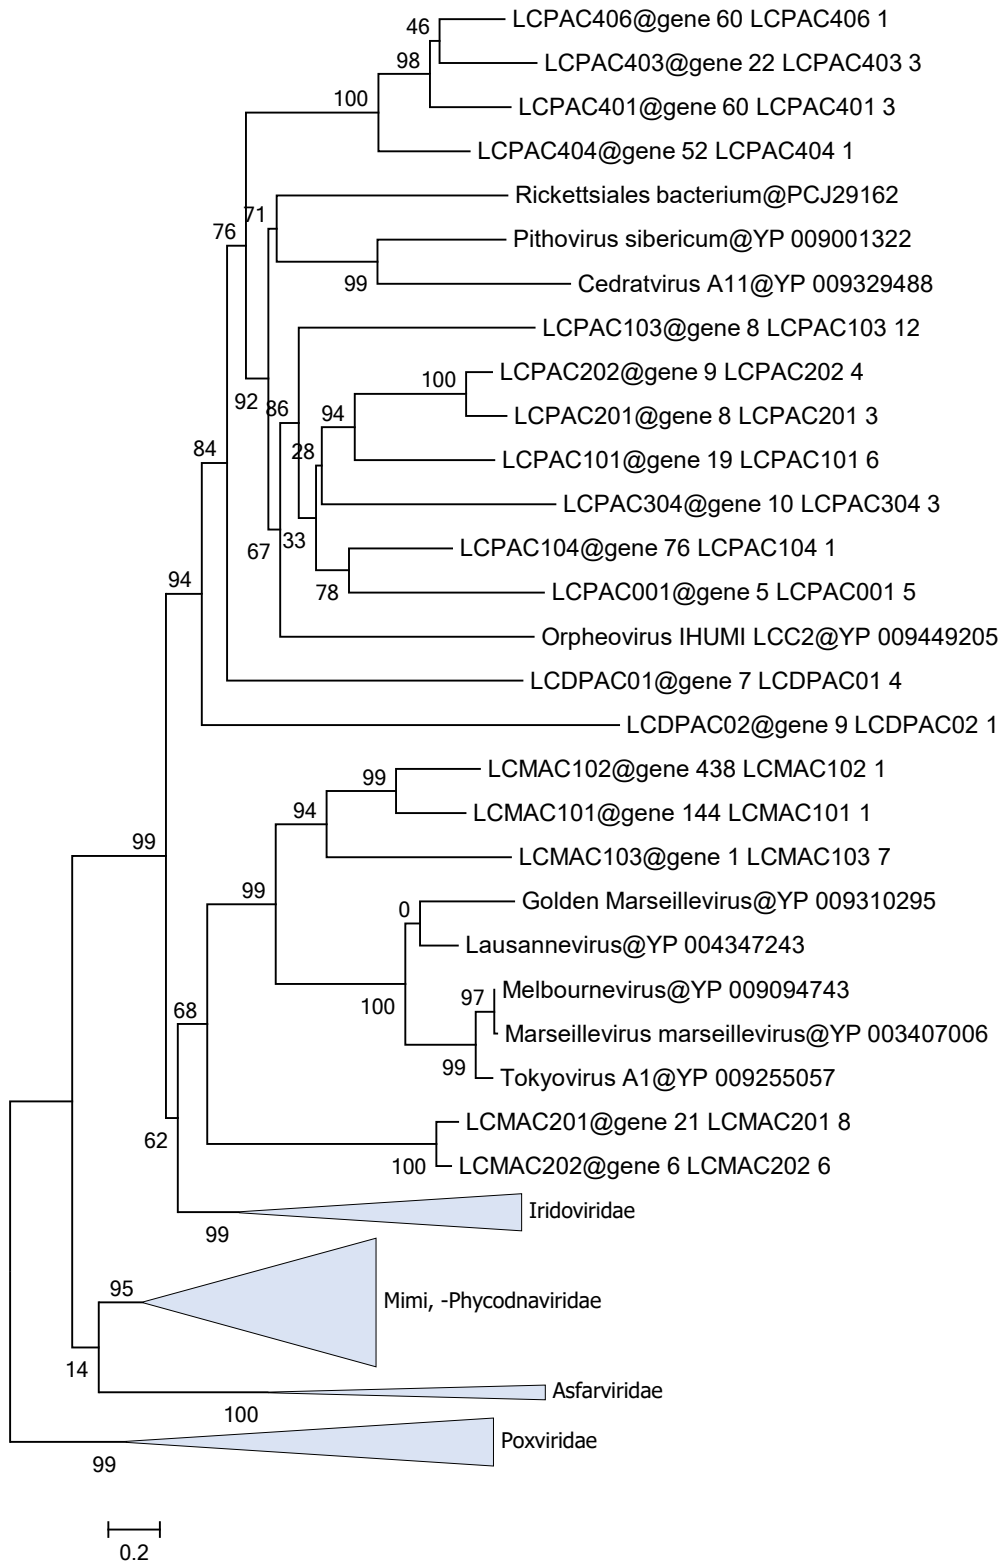

AlaS

Alanyl-tRNA synthetase

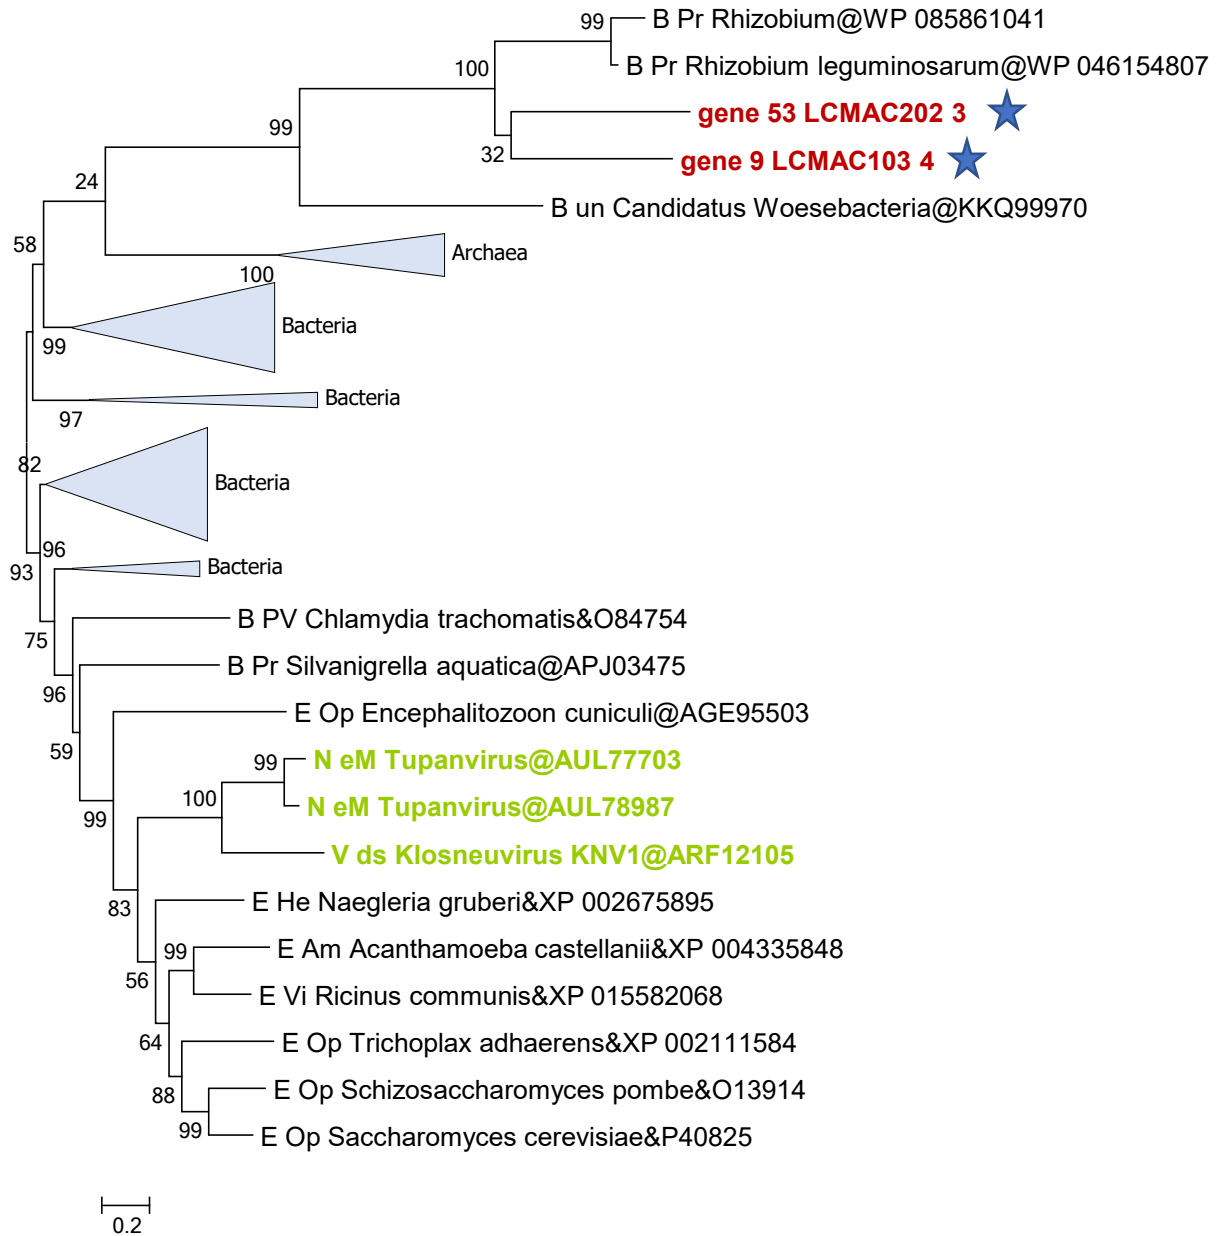

# AsnS Aspartyl/asparaginyl-tRNA synthetase

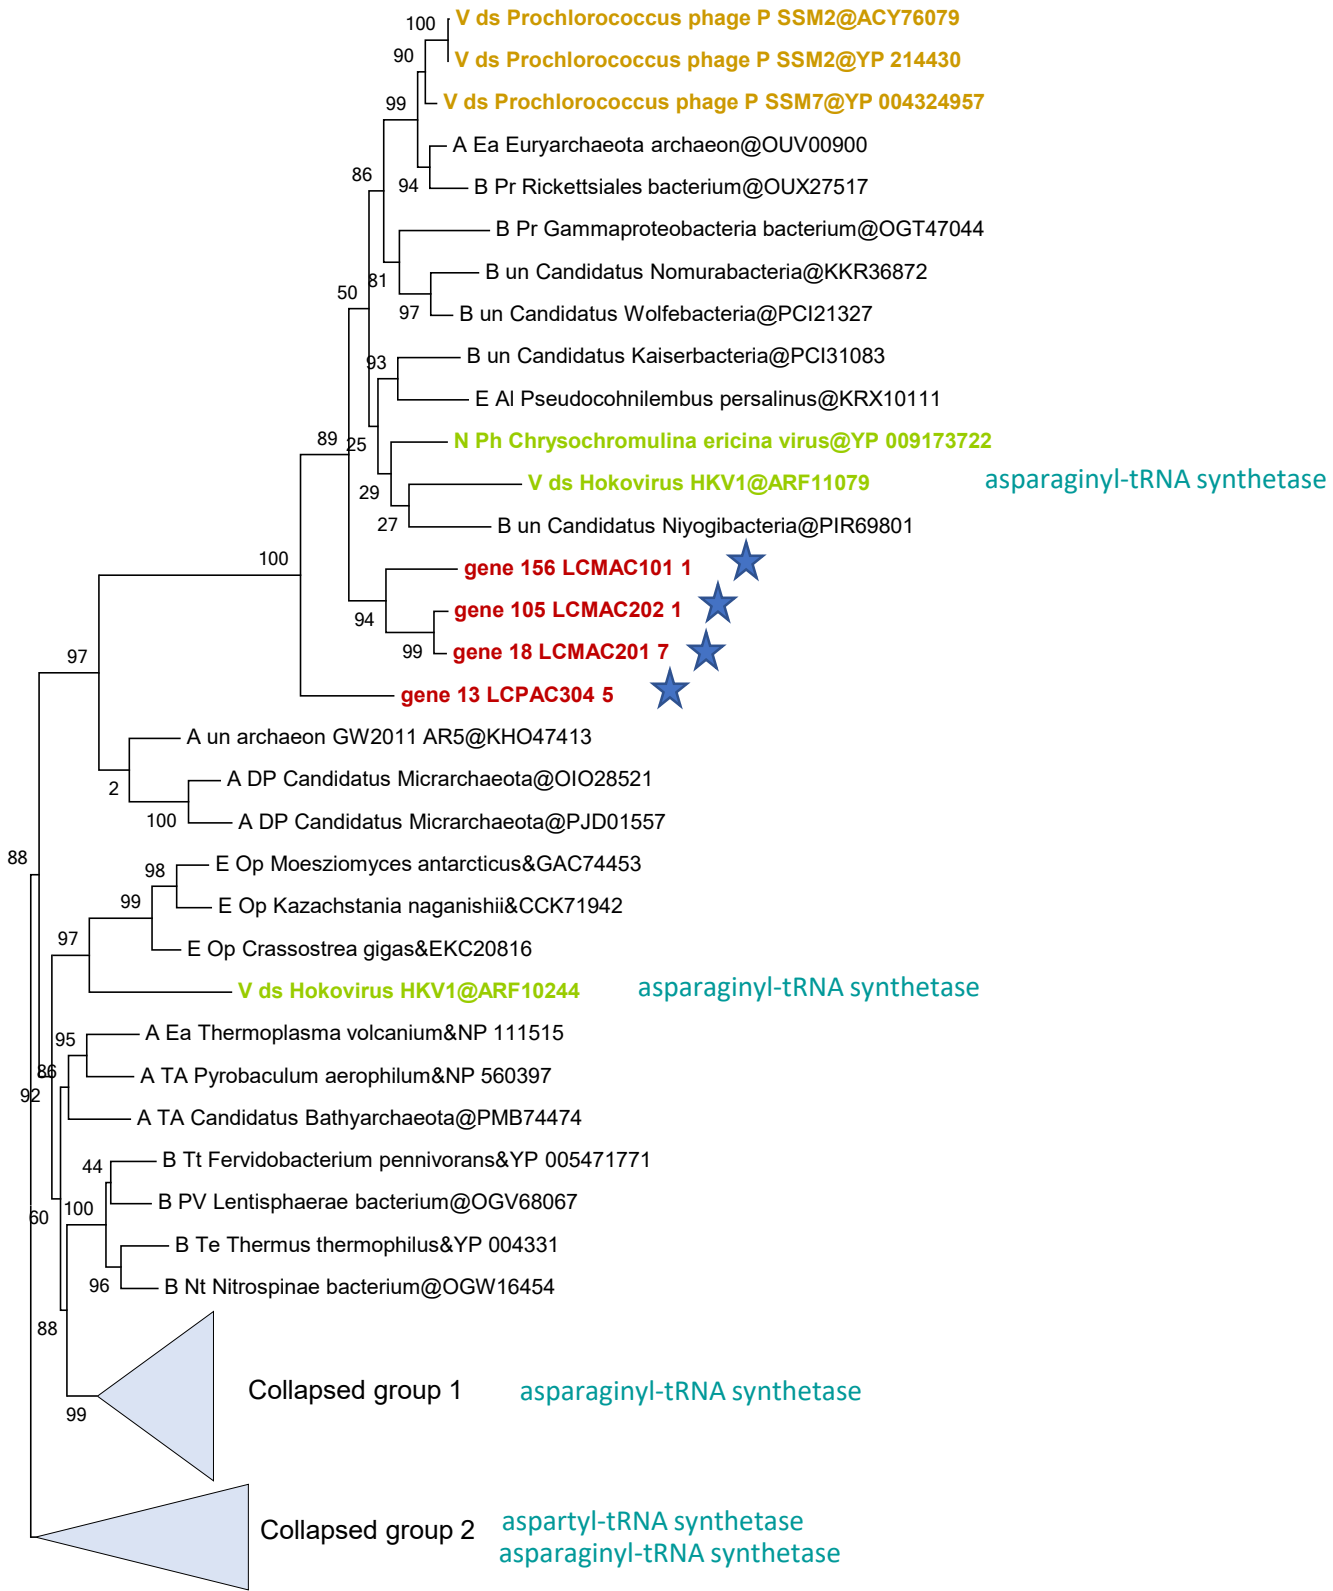

# AsnS Aspartyl/asparaginyl-tRNA synthetase

## Collapsed group 1

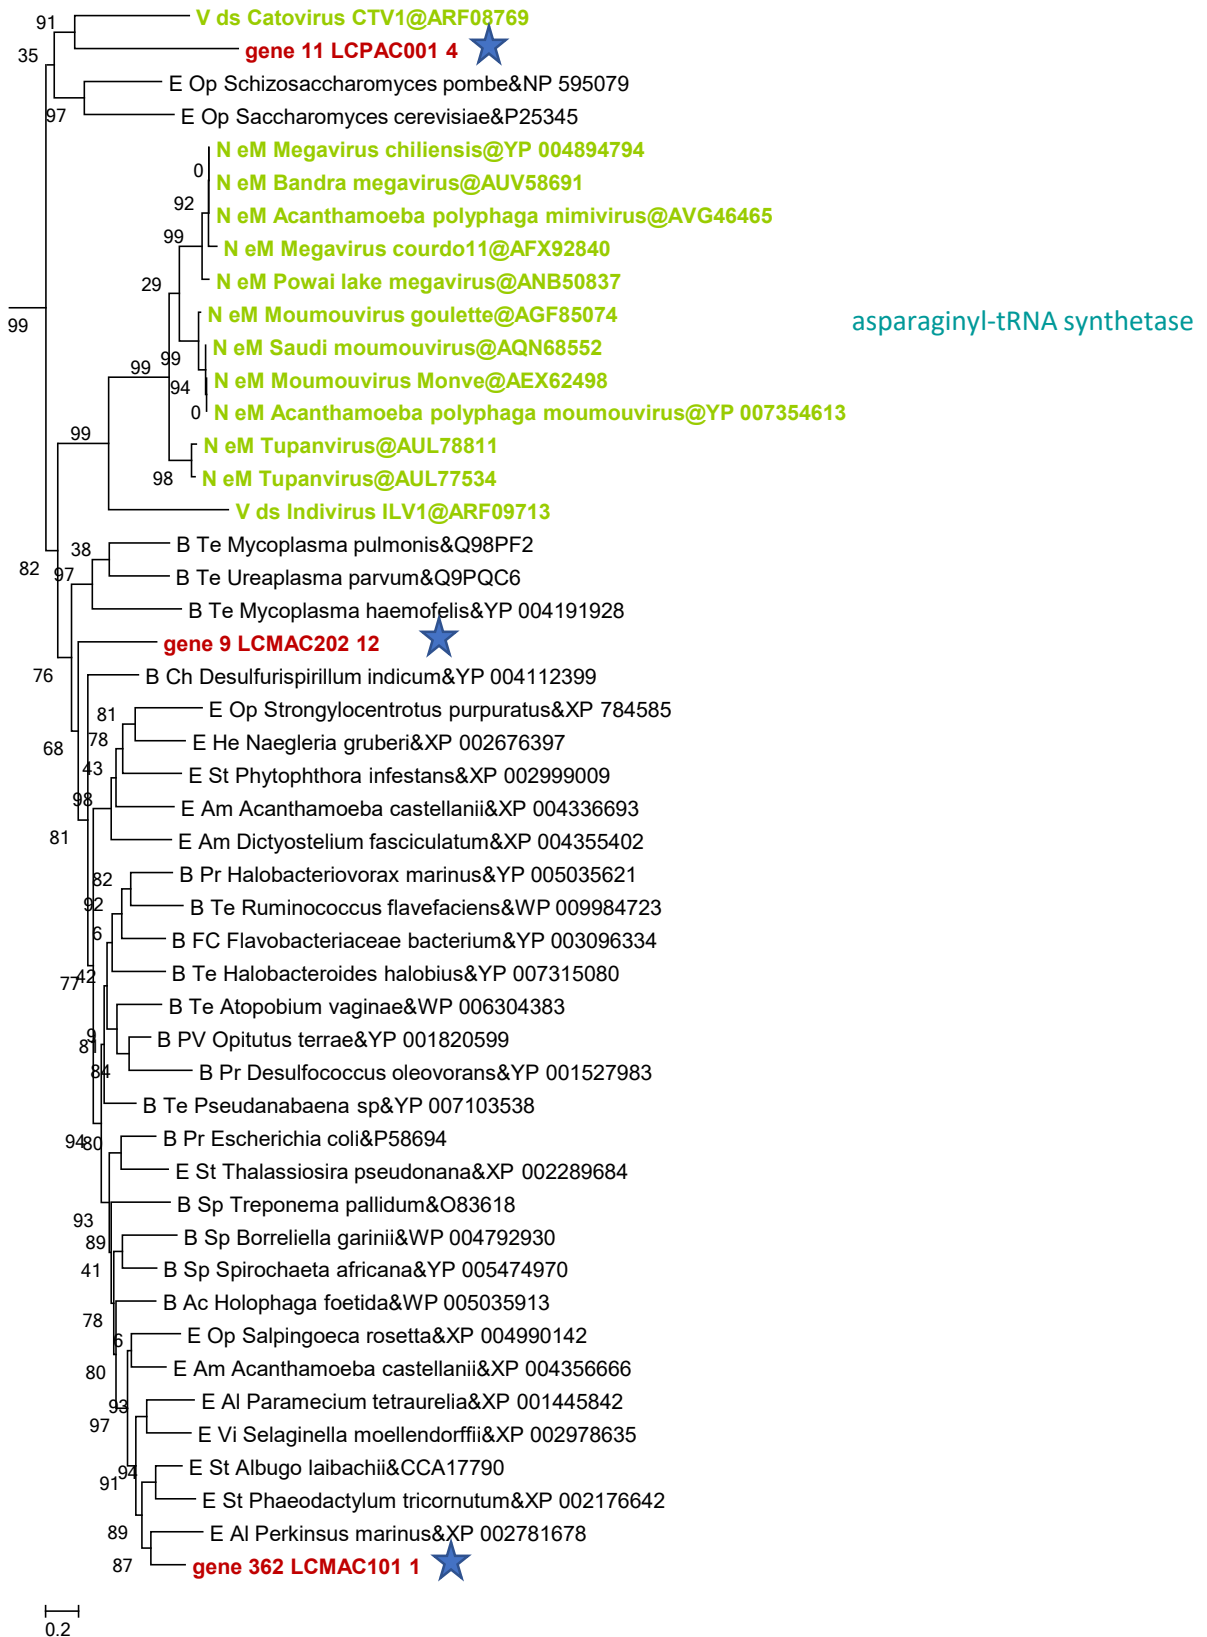

# AsnS Aspartyl/asparaginyl-tRNA synthetase

Collapsed group 2

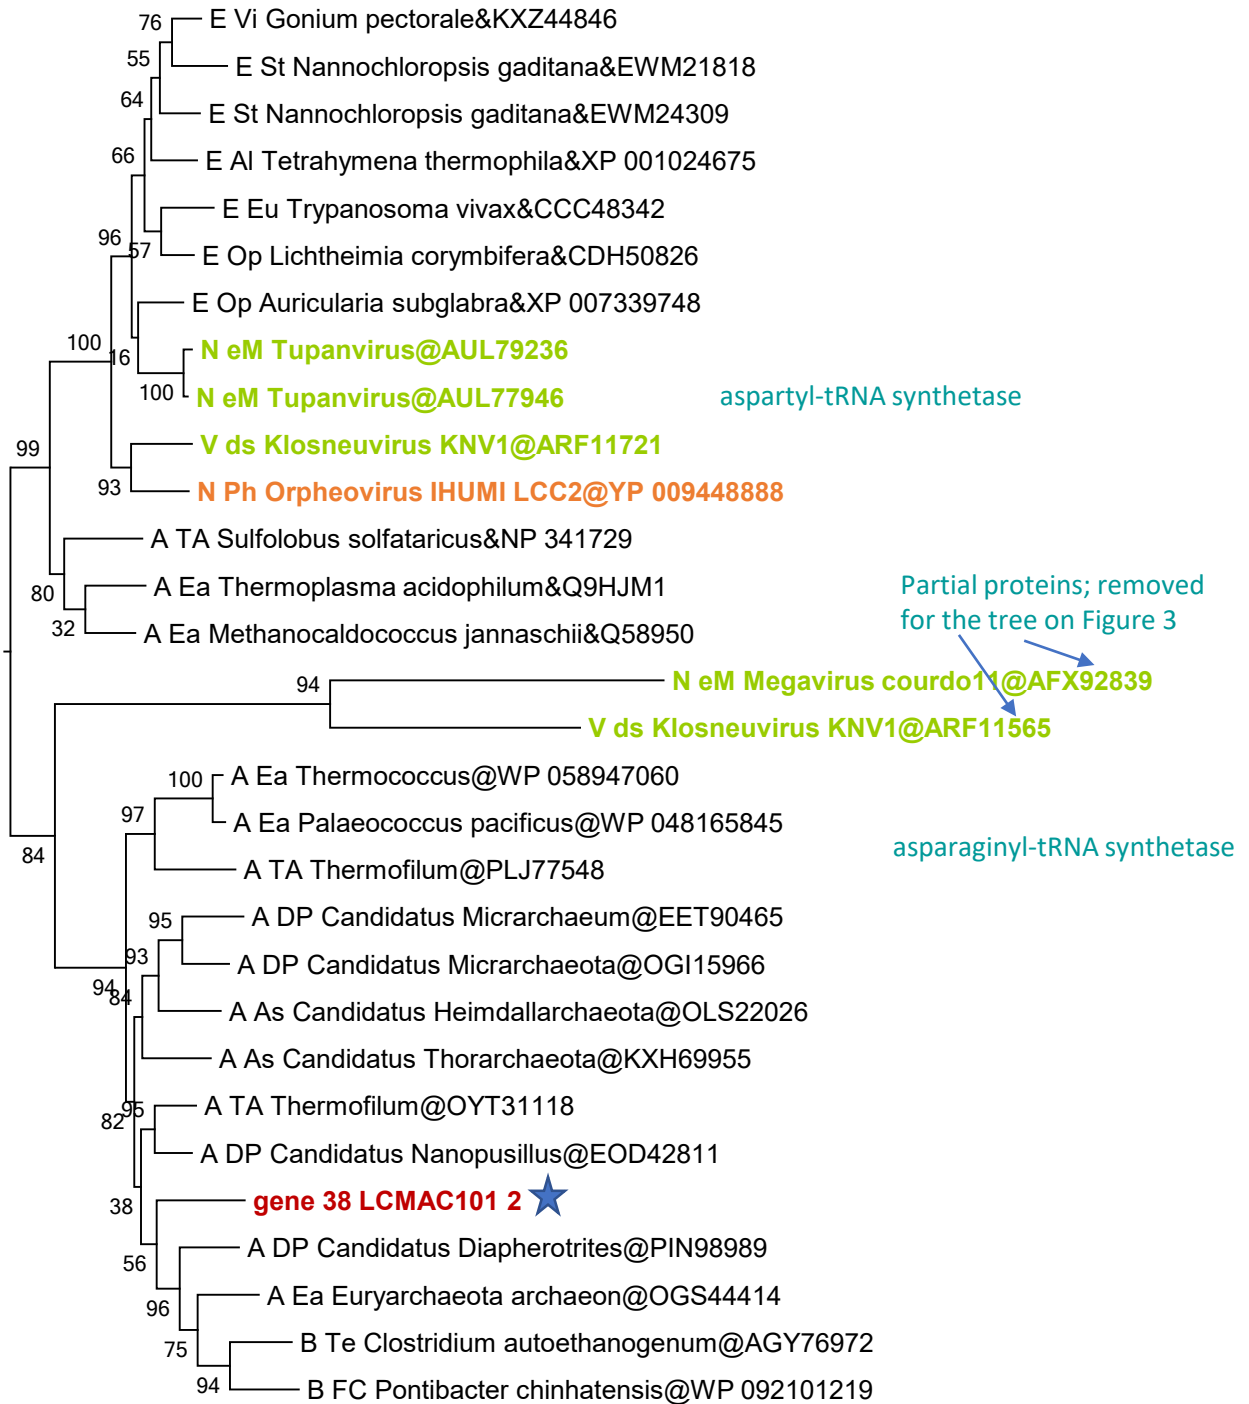

0.2



# GlnS Glutamyl- or glutaminyl-tRNA synthetase

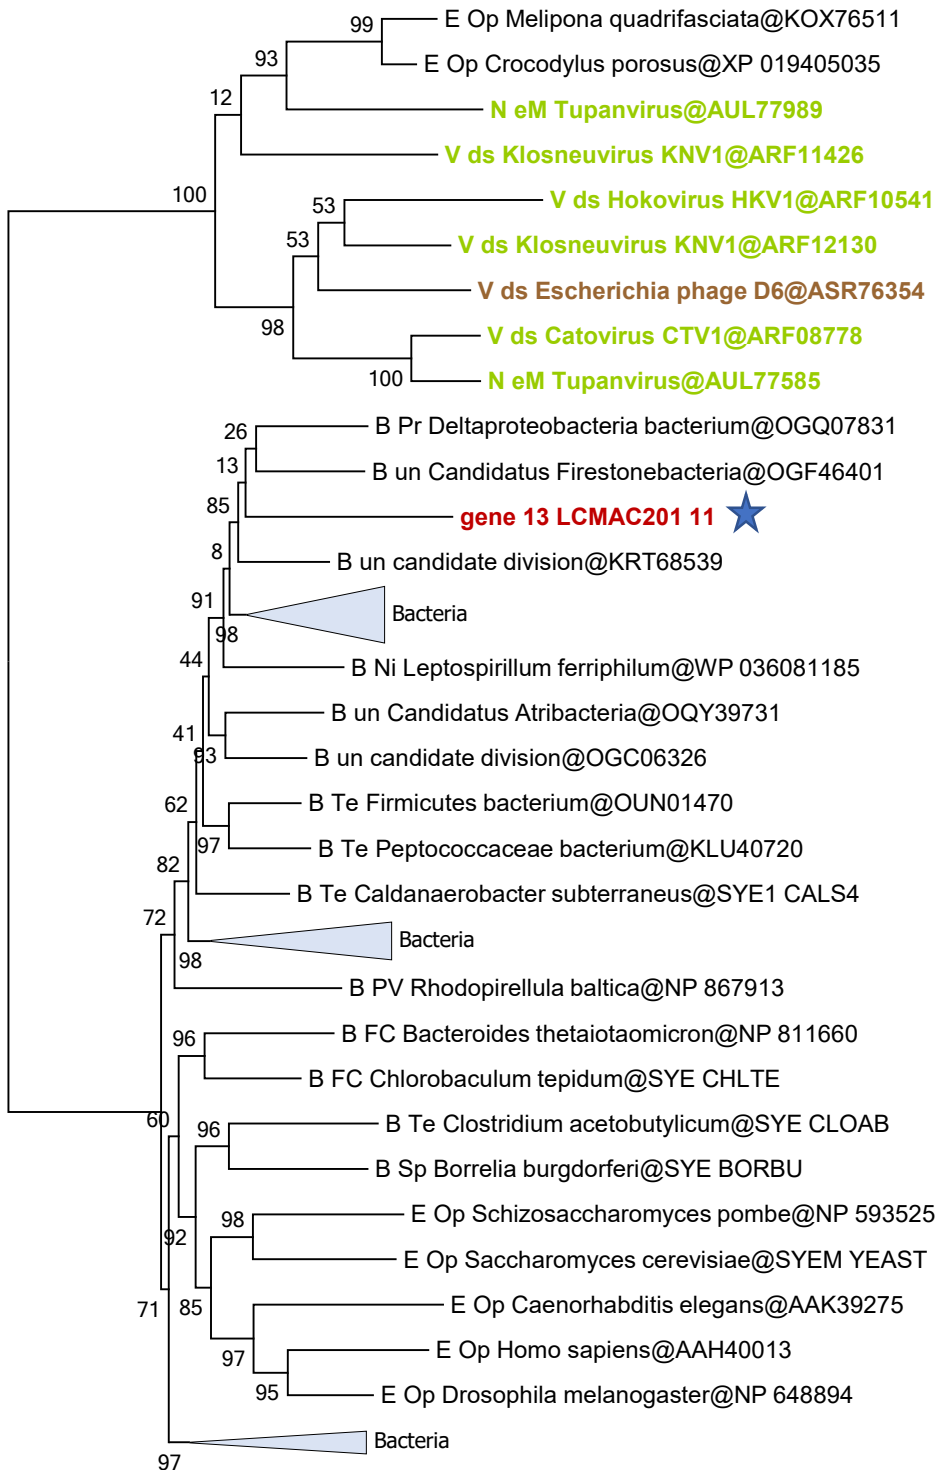

0.2

# GRS1 Glycyl-tRNA synthetase (class II)

Also Orpheovirus YP\_009448415

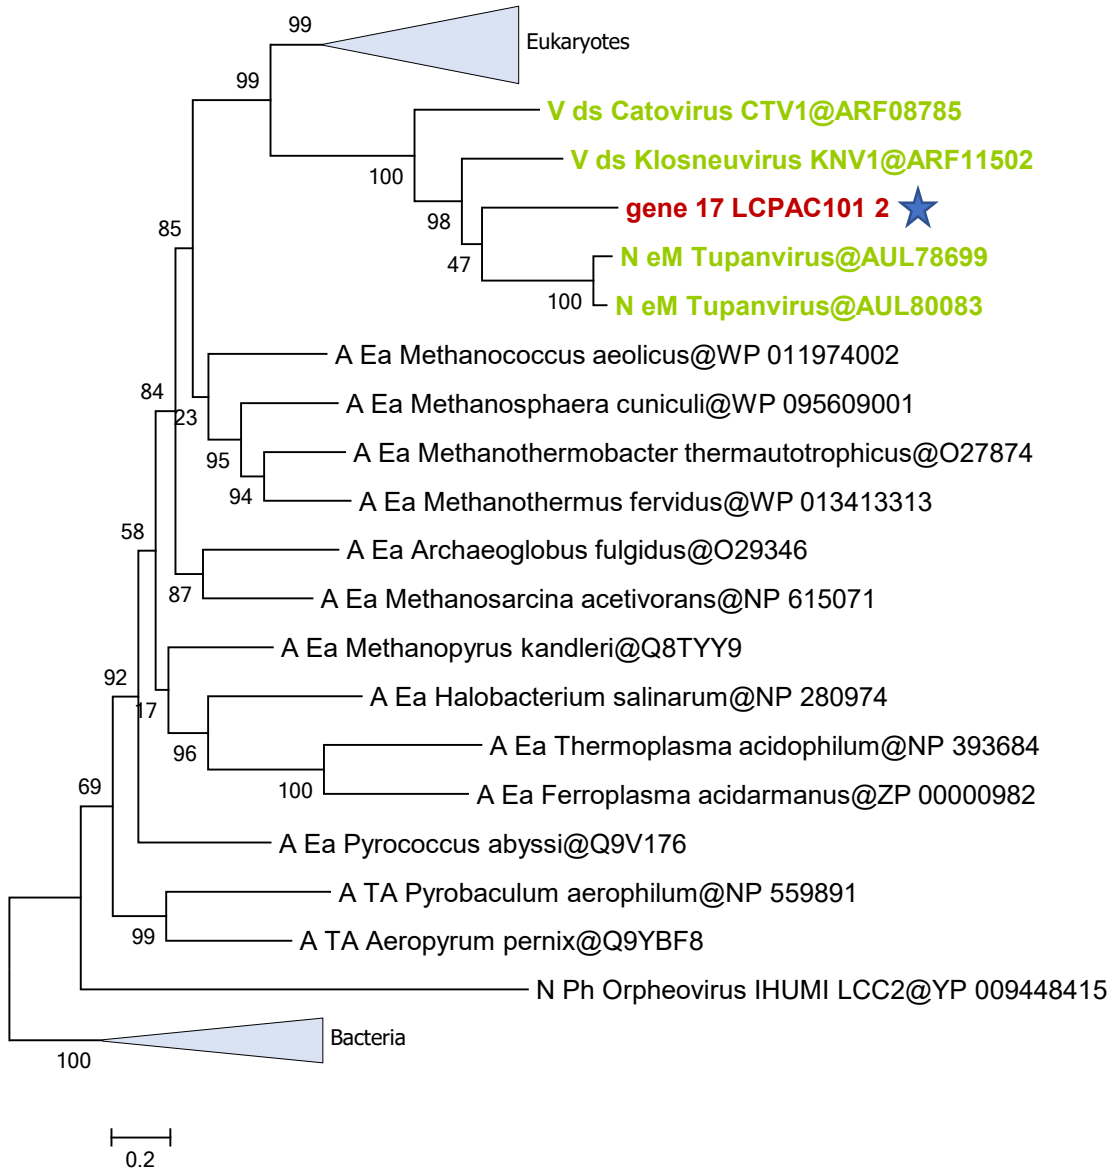

# HisS Histidyl-tRNA synthetase

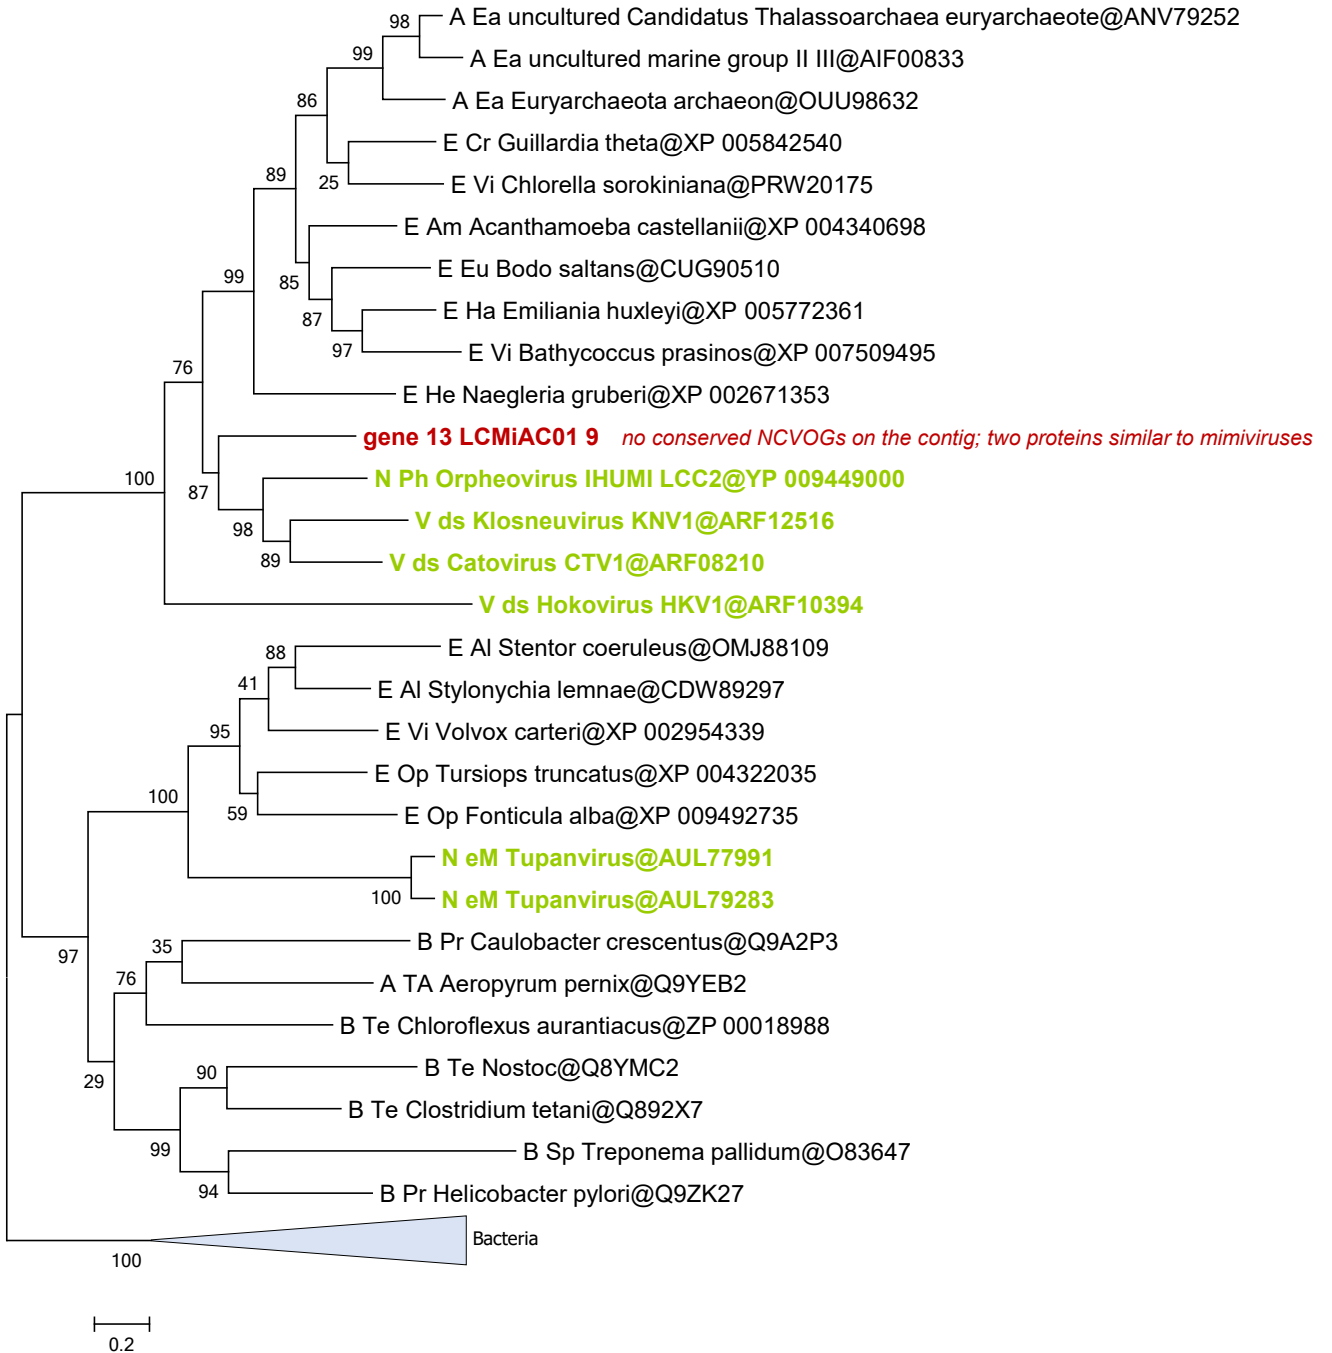

# IleS Isoleucyl-tRNA synthetase

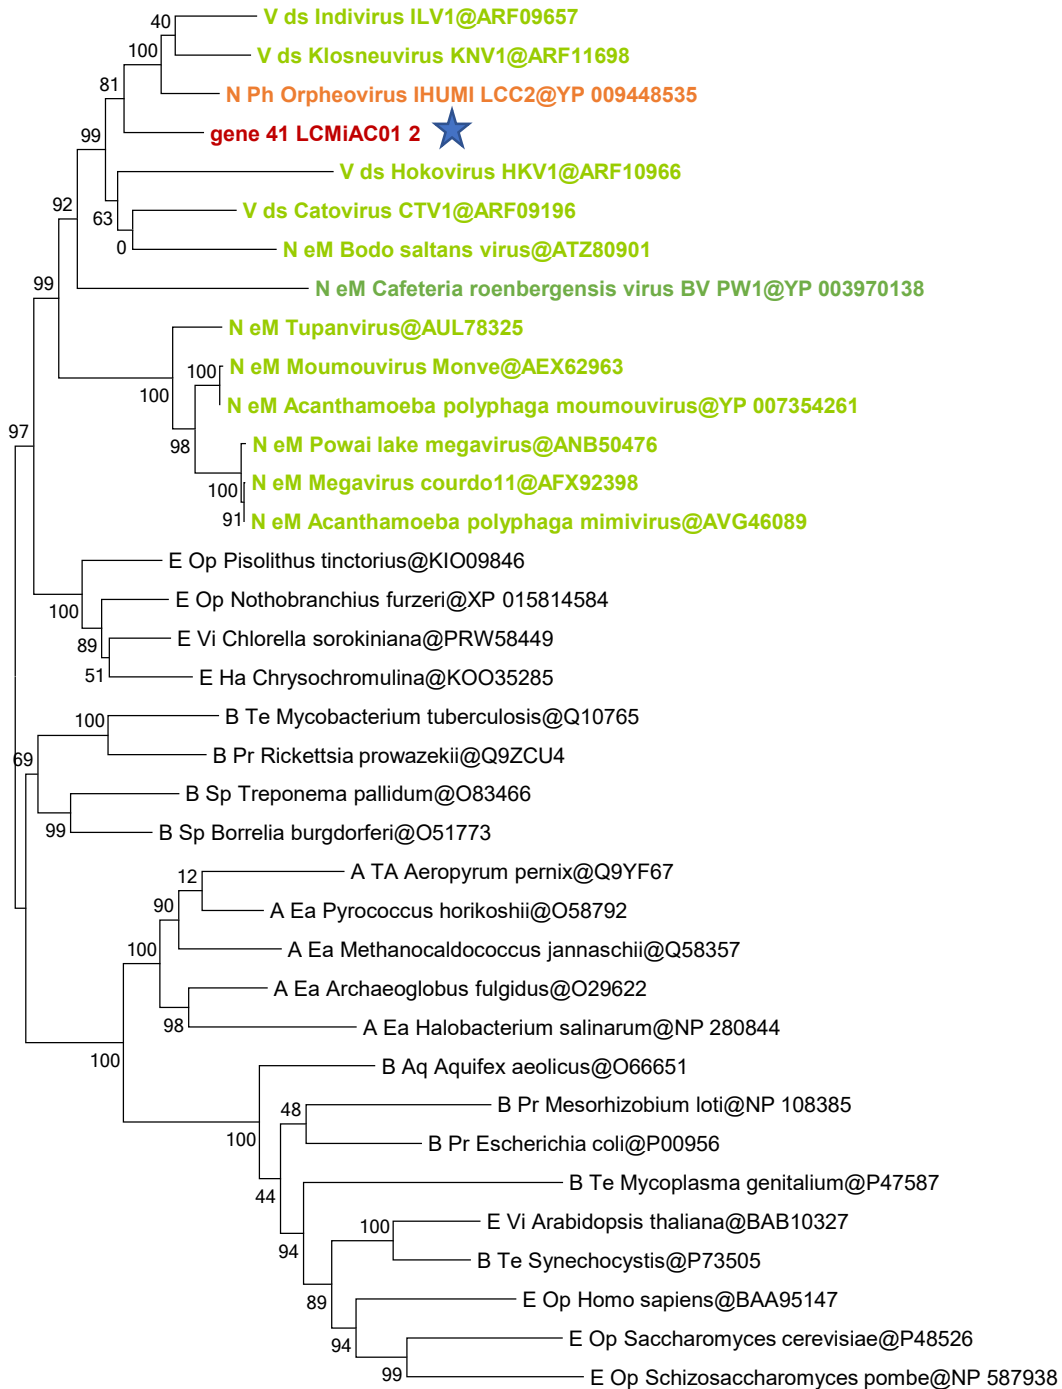

0.2

# MetS Methionyl-tRNA synthetase

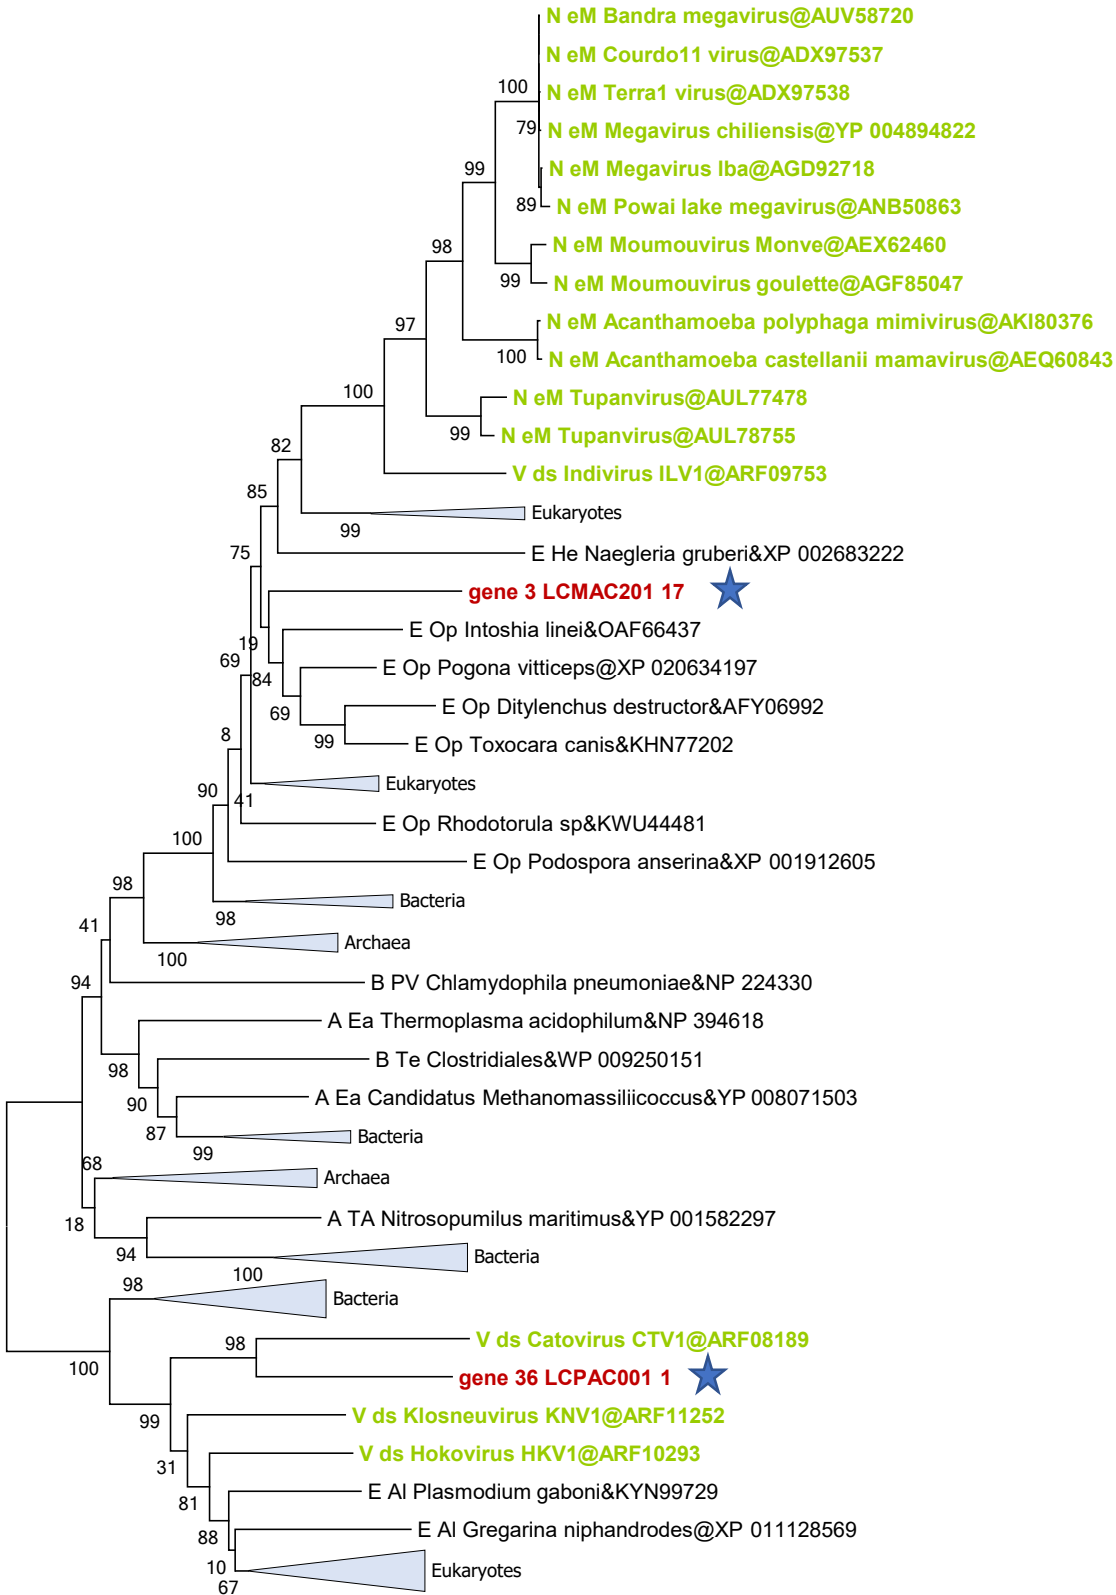

0.2

# ProS Prolyl-tRNA synthetase

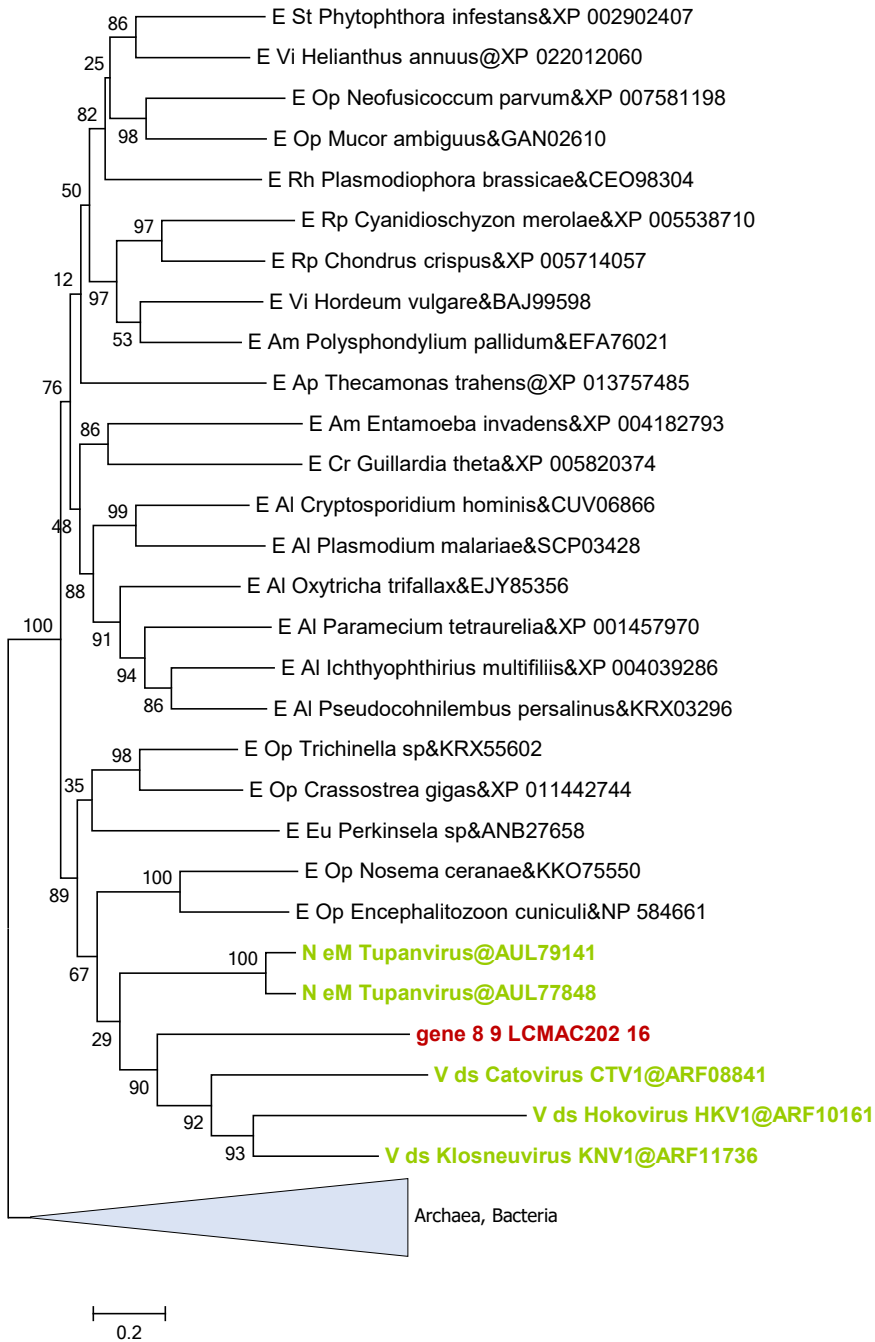

# ThrS Threonyl-tRNA synthetase

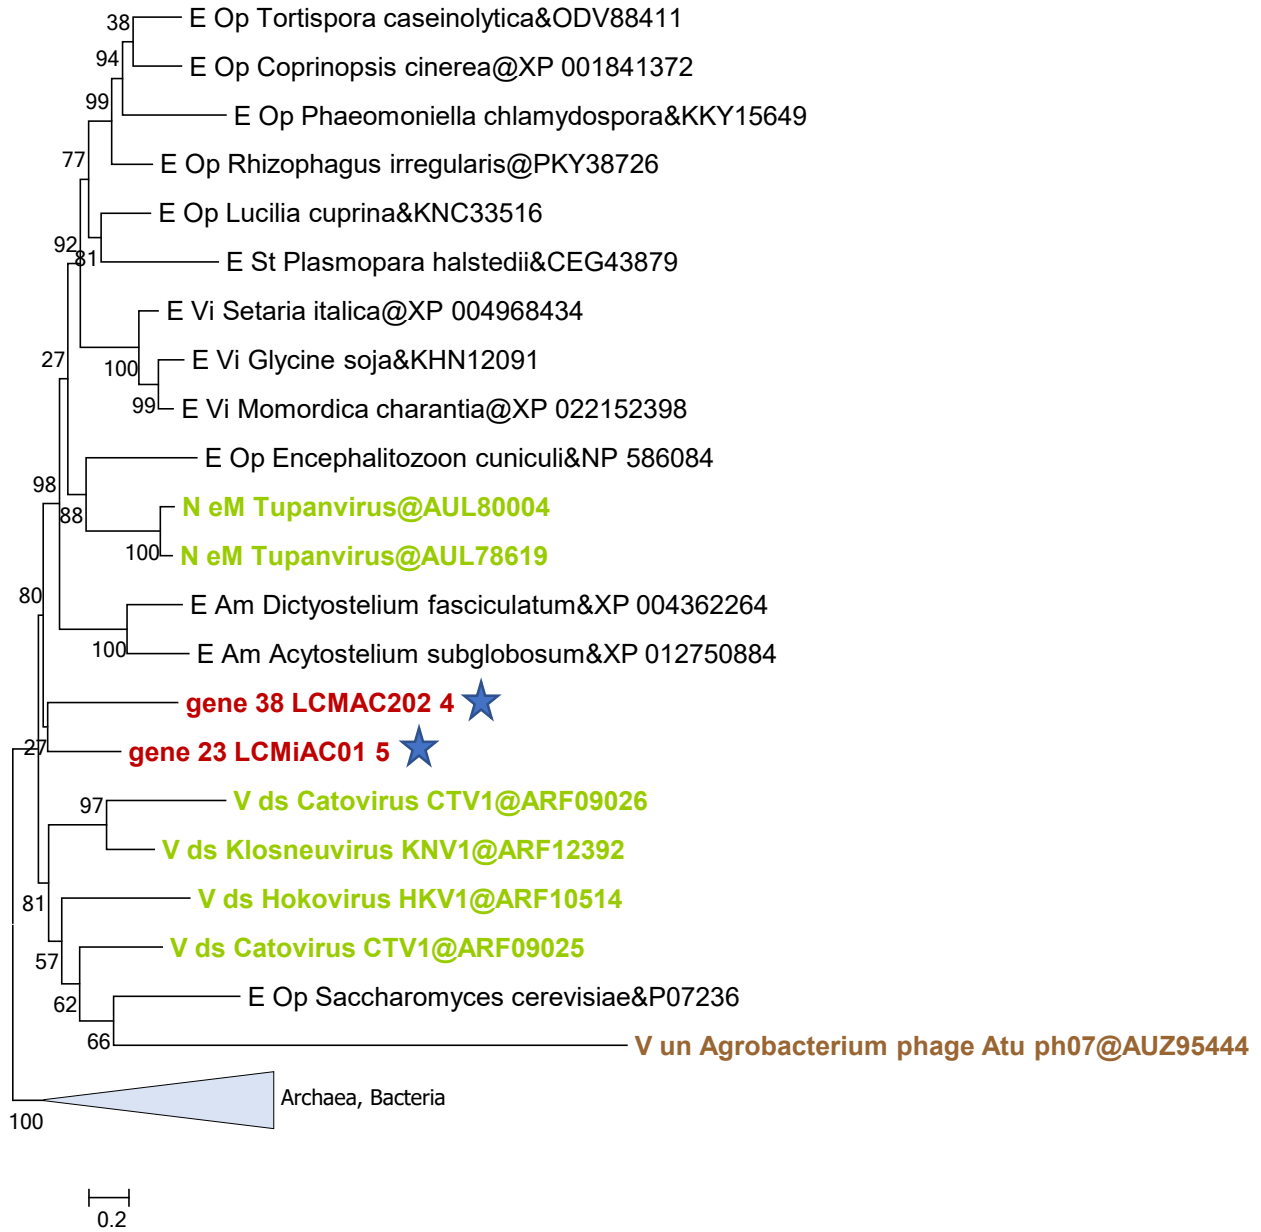

# TrpS Tryptophanyl-tRNA synthetase

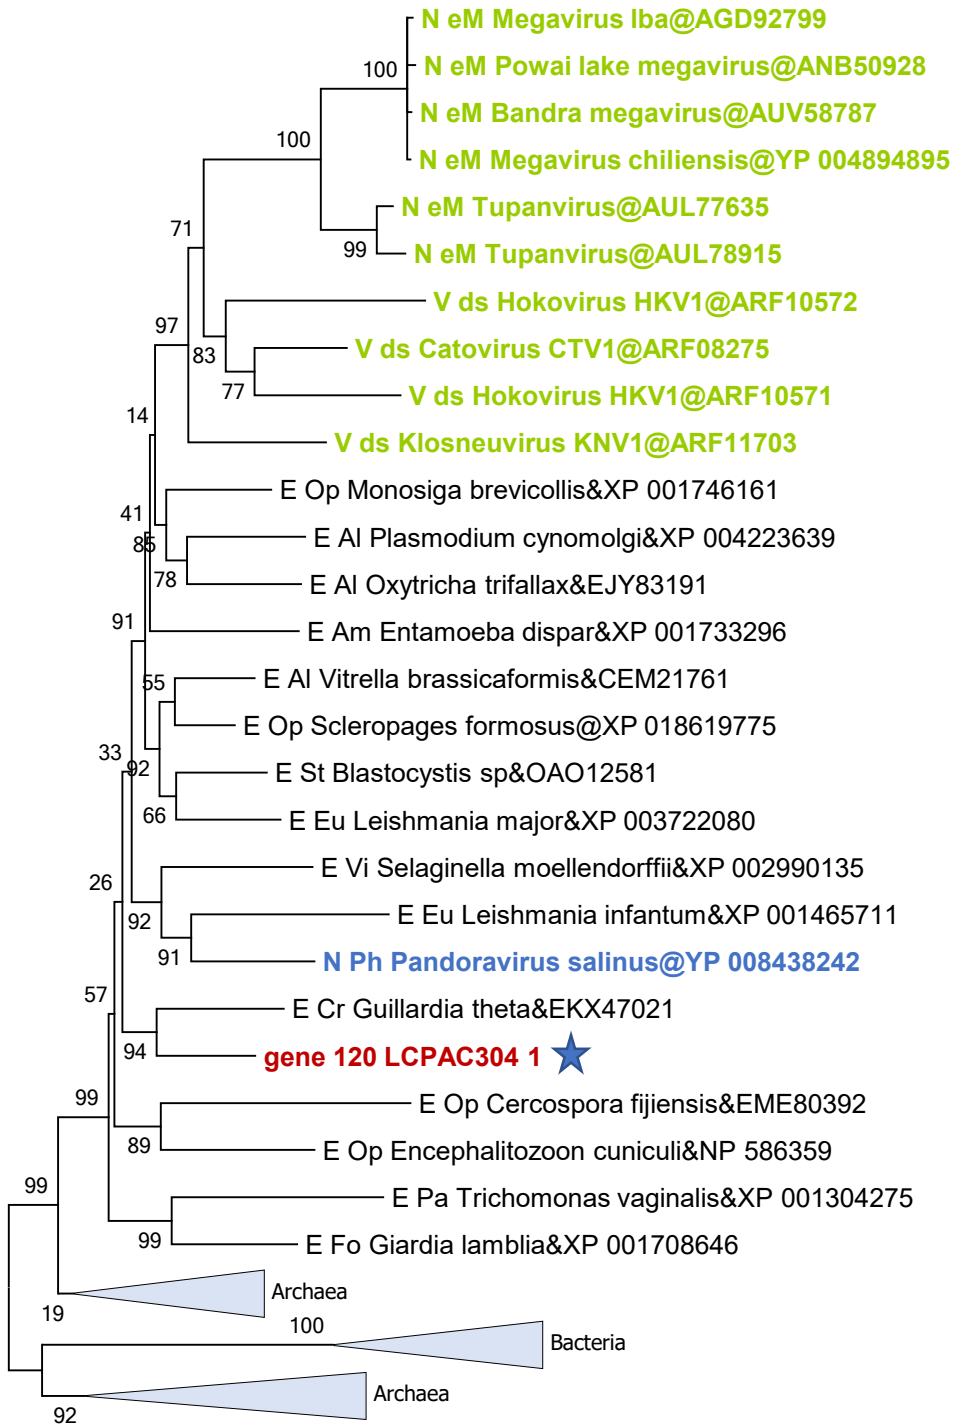



# TyrS Tyrosyl-tRNA synthetase

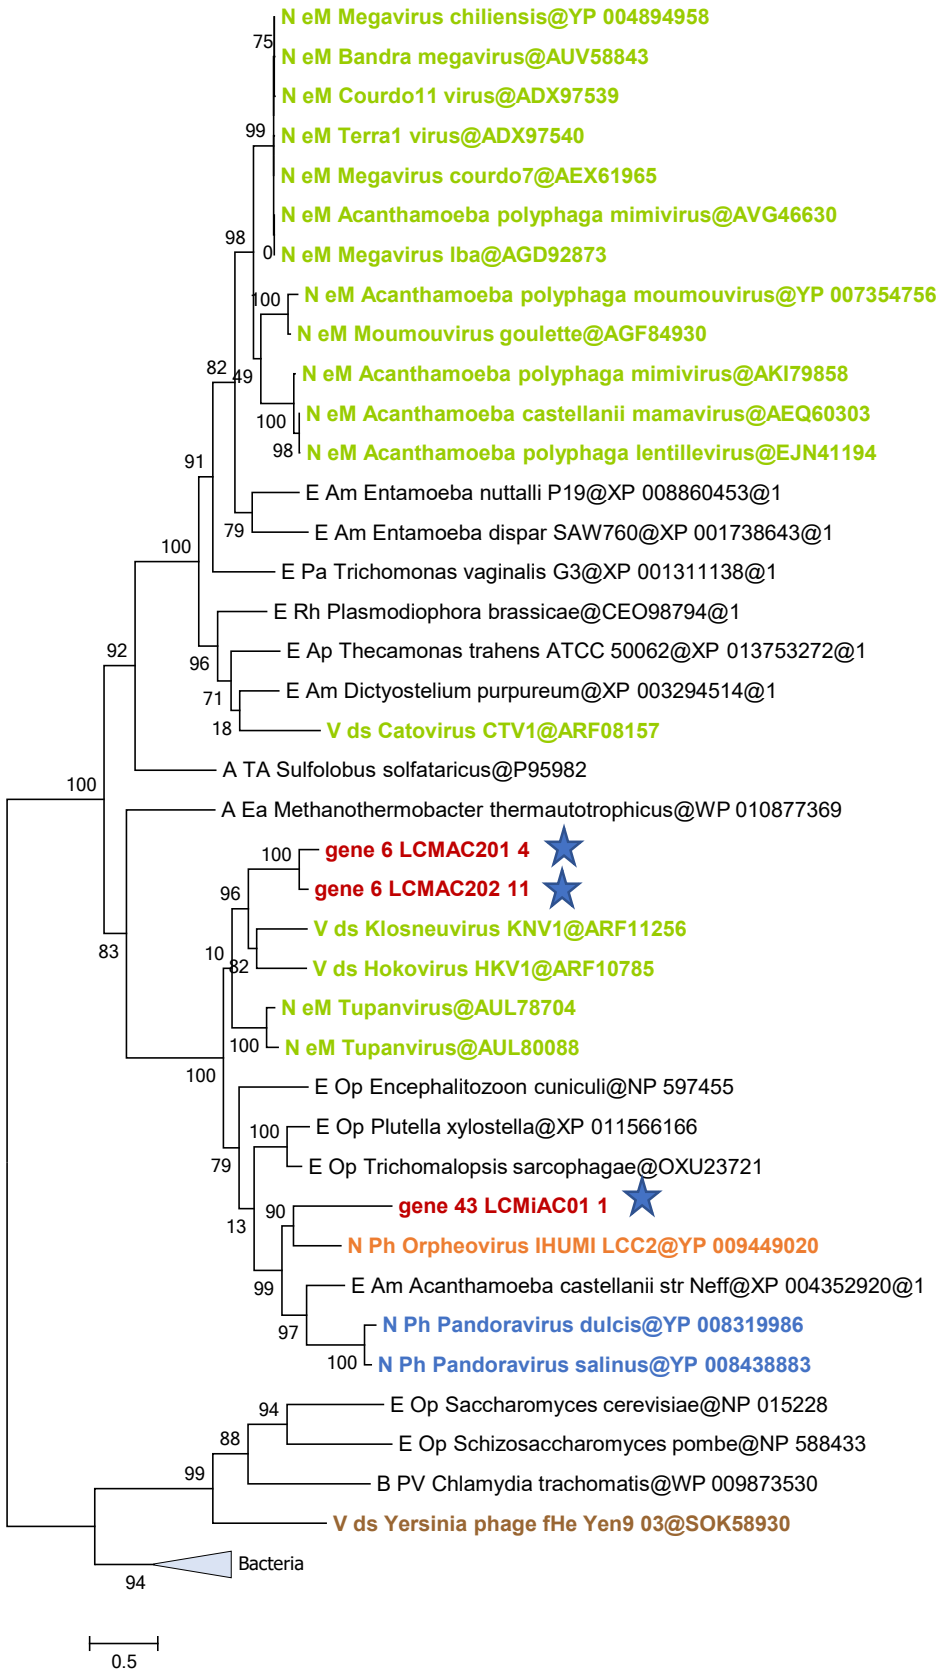

# Pth2 Peptidyl-tRNA hydrolase

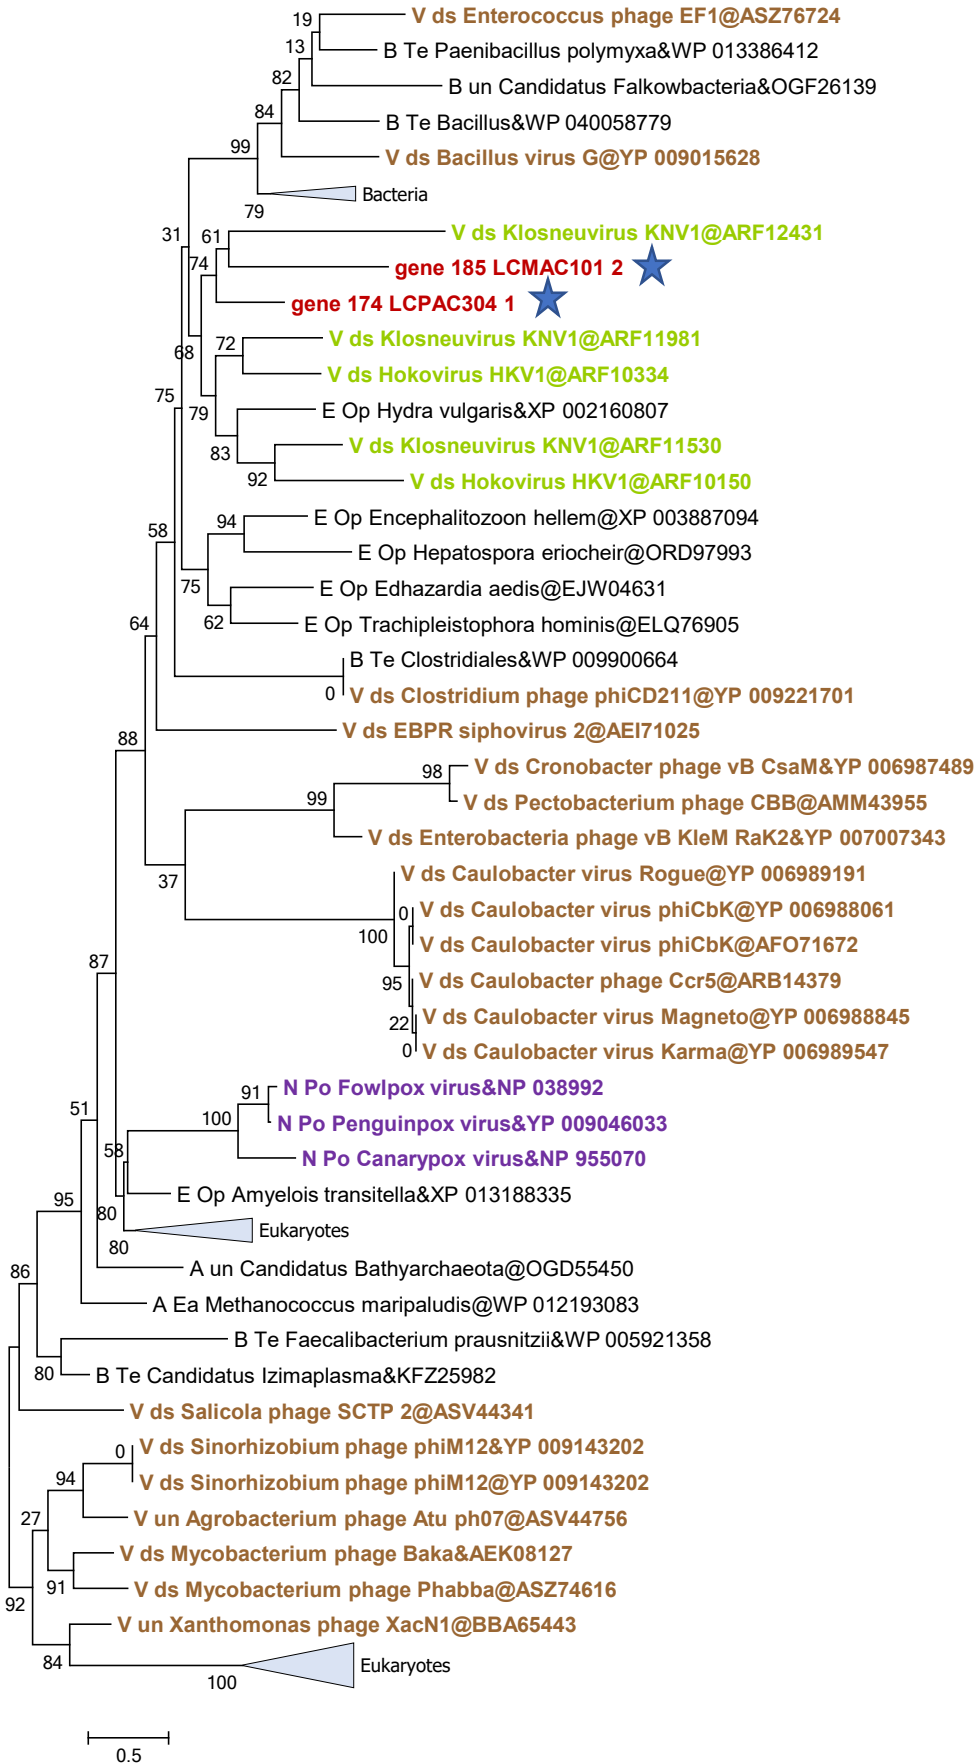

# eIF1 Translation initiation factor 1 (eIF-1/SUI1)

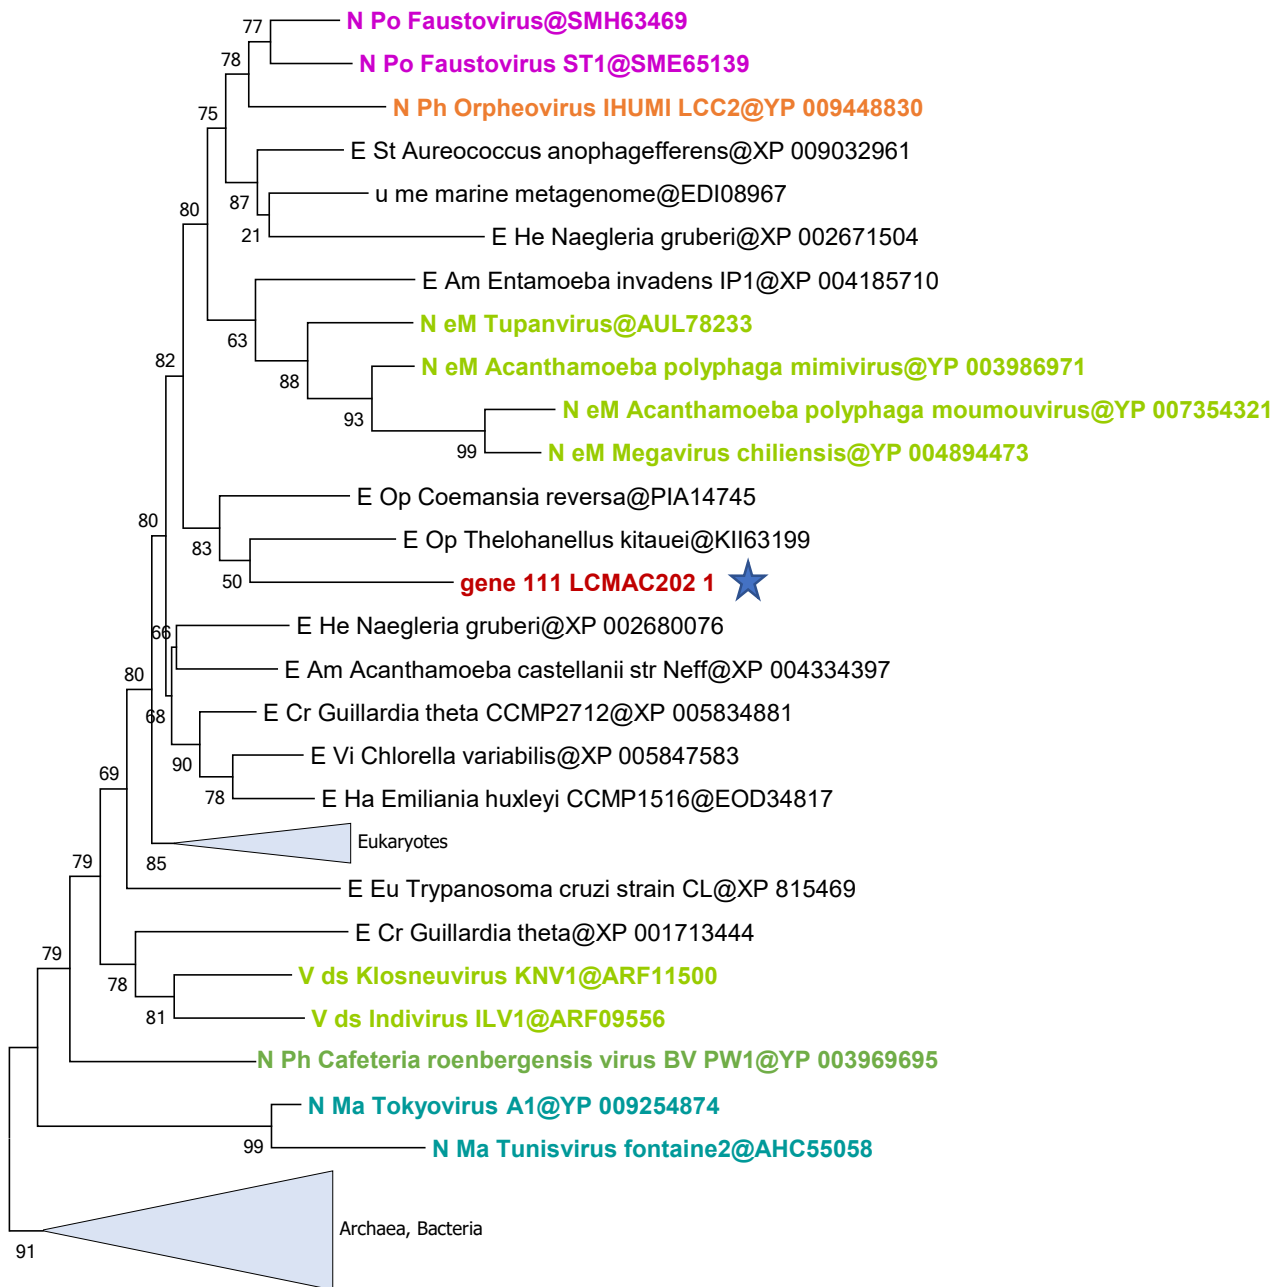

# eIF2a Translation initiation factor 2, alpha subunit (eIF-2alpha)

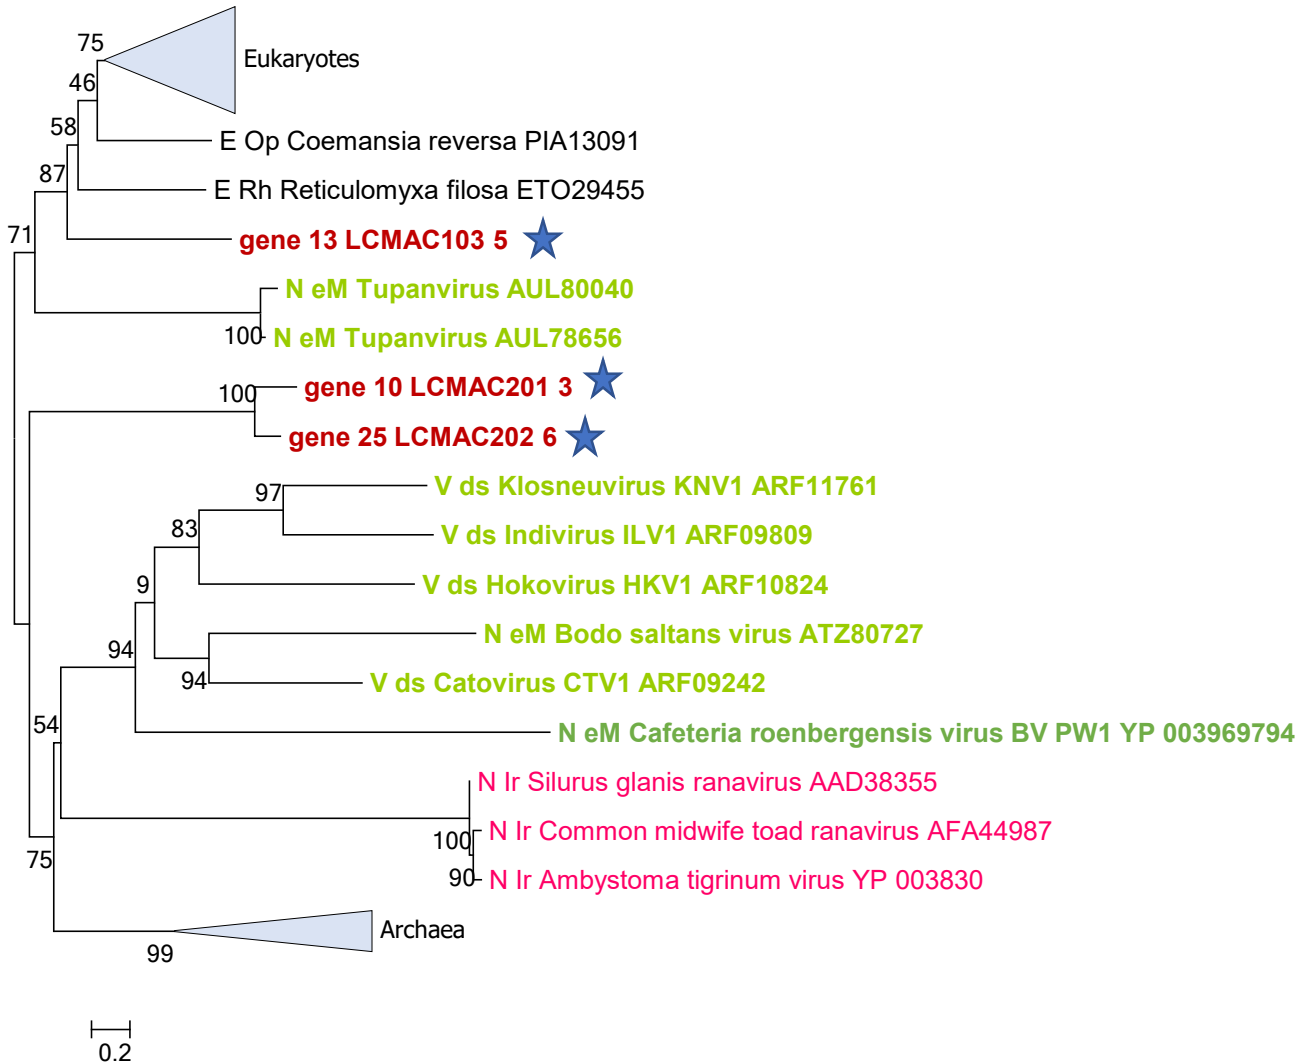

# eIF2b Translation initiation factor 2, beta subunit (eIF-2beta)/eIF-5 N-terminal domain

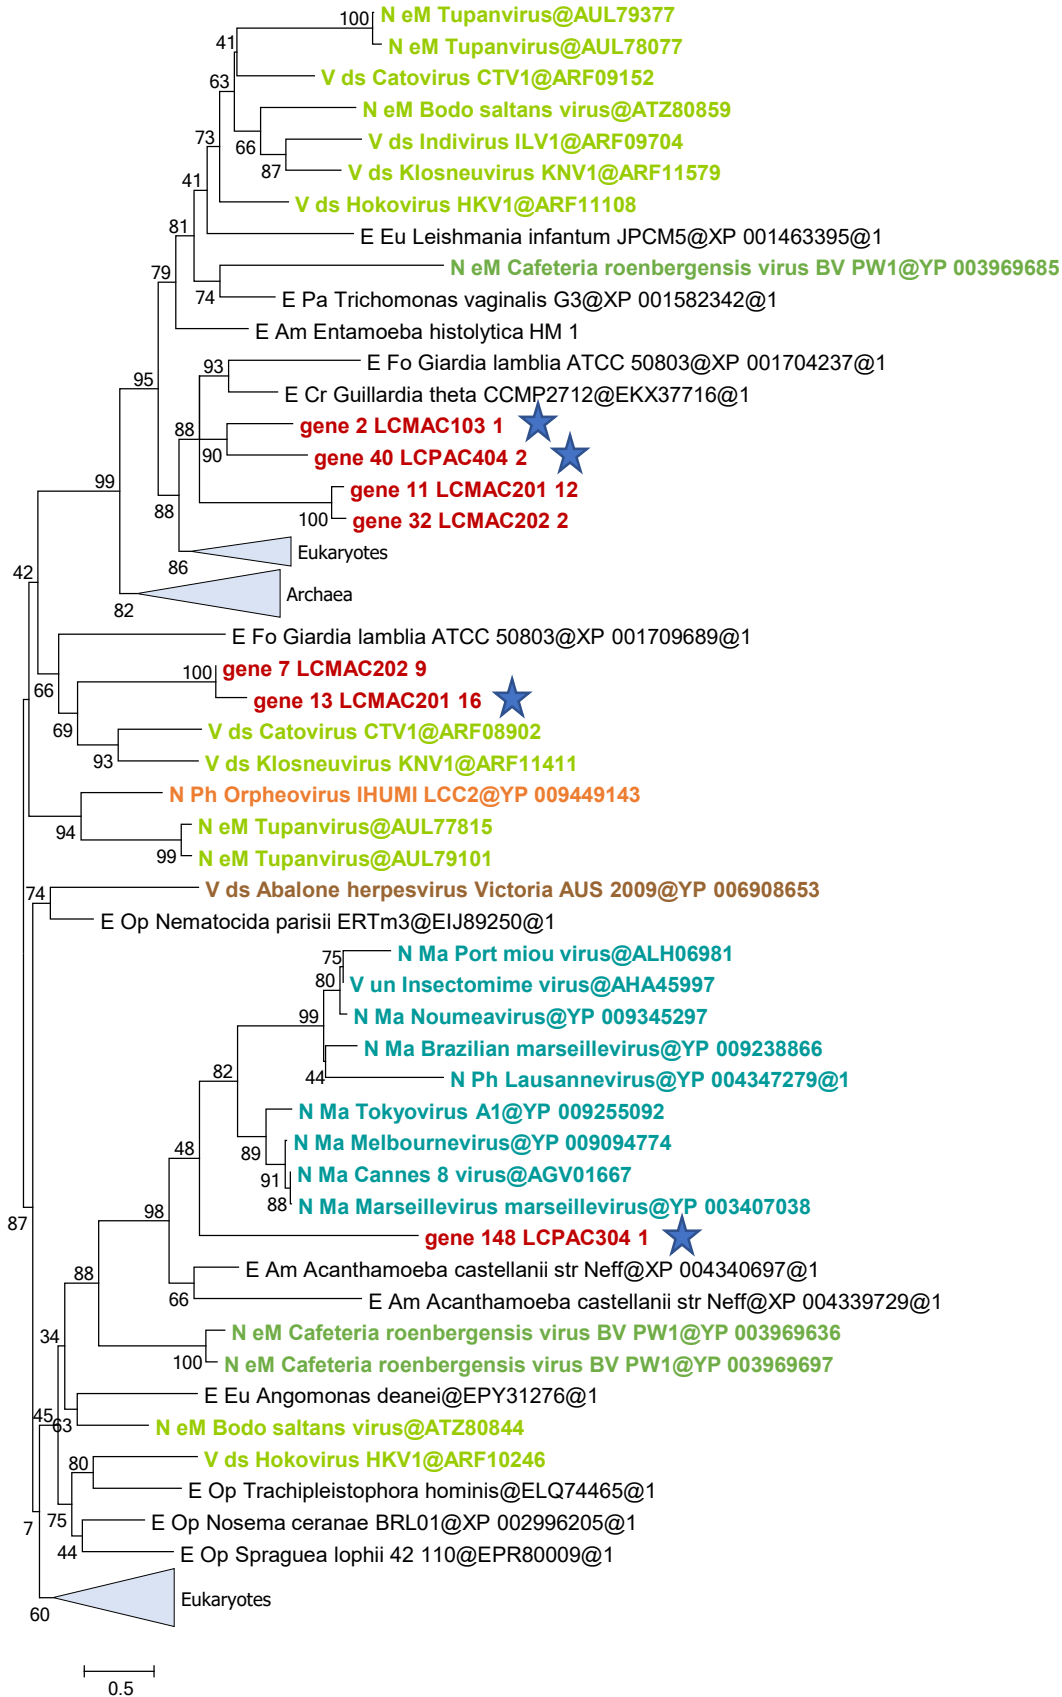

# eIF2g Translation initiation factor 2, gamma subunit (eIF-2gamma; GTPase)

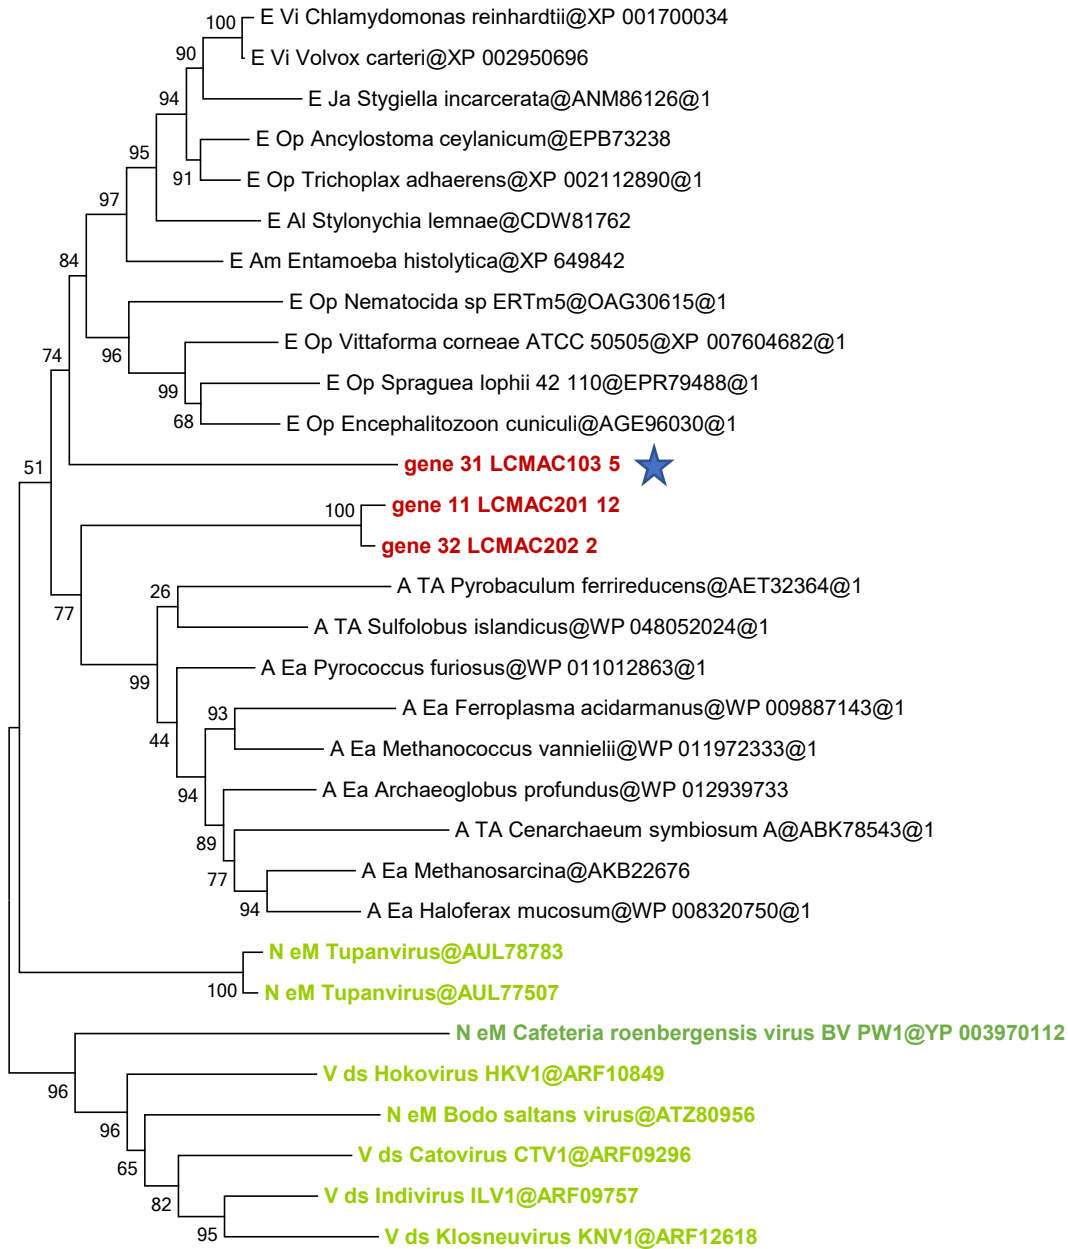

0.2

# eIF4e Translation initiation factor 4E (eIF-4E)

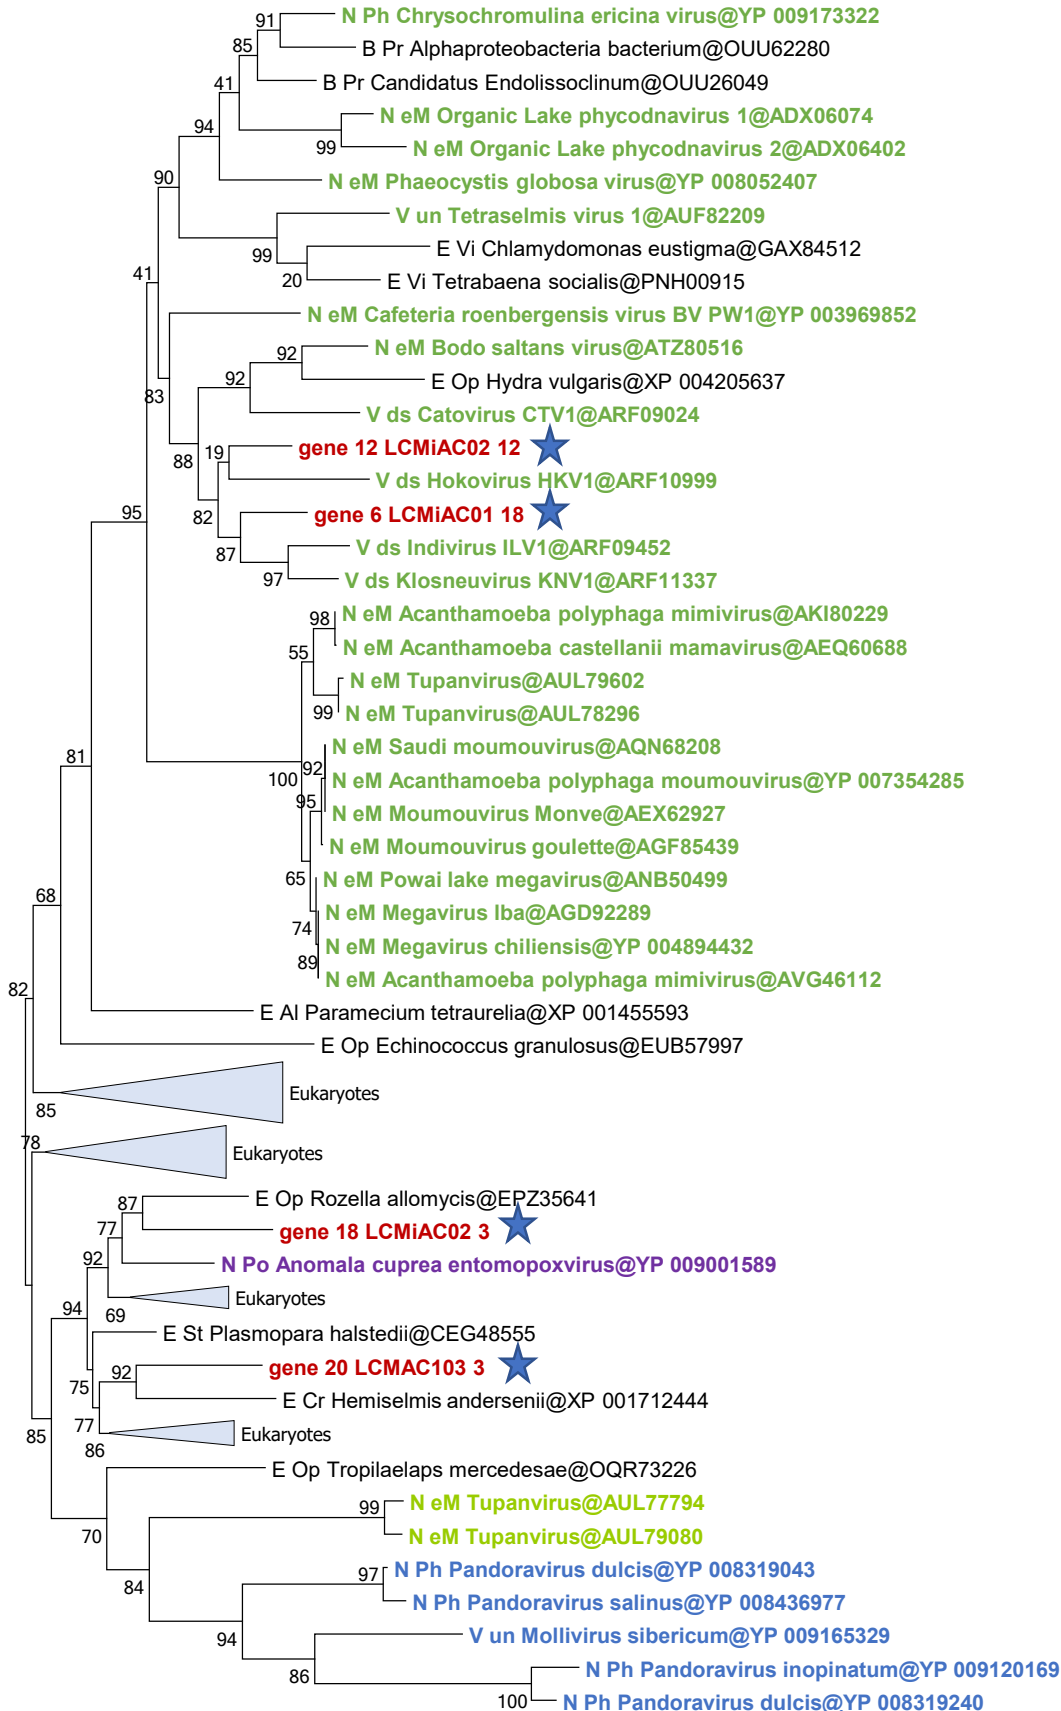

0.2

# eIF5B / IF2 Translation initiation factor IF-2

Initiation Factor 2 (IF2) eukaryotic Initiation Factor 5B (eIF5B) family; IF2/eIF5B

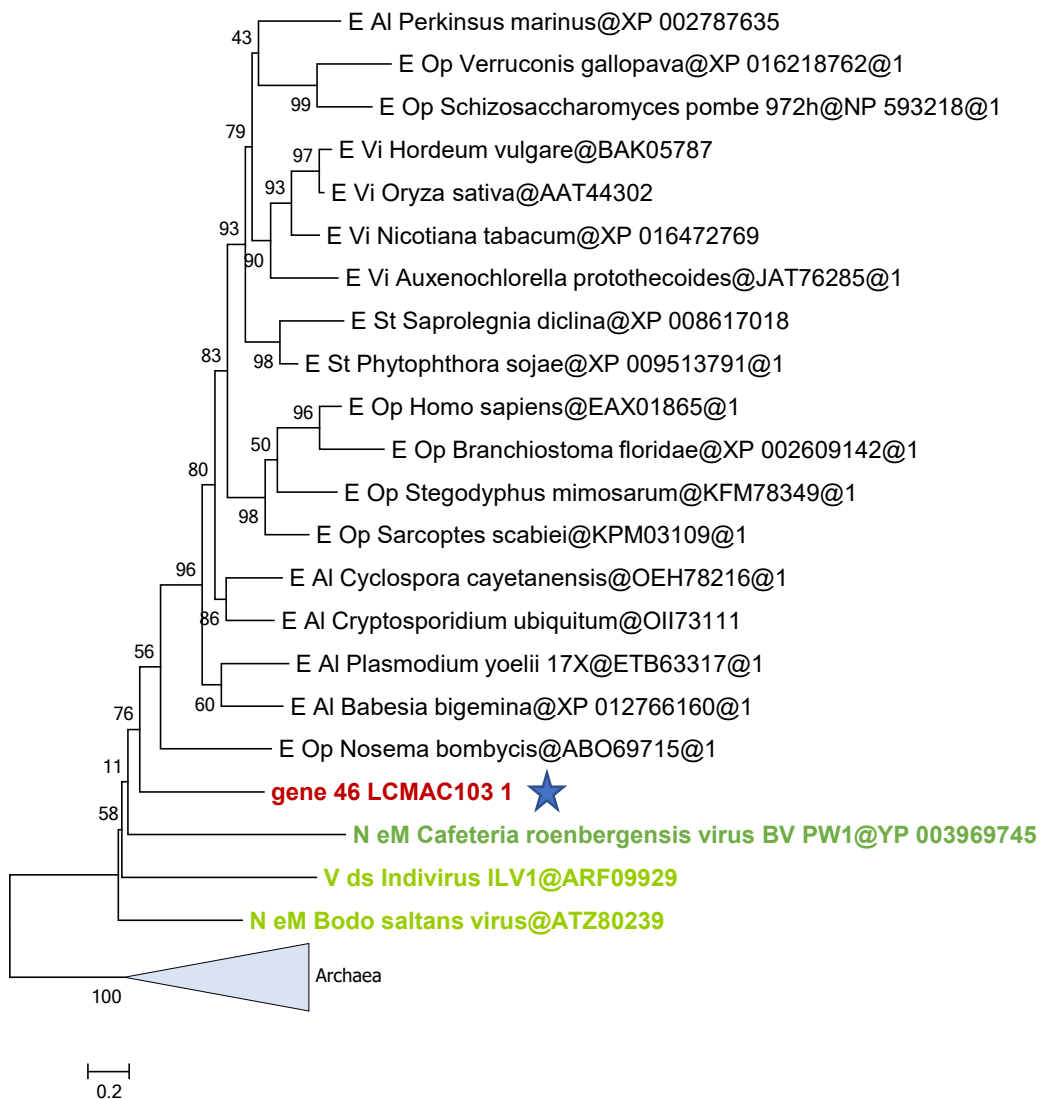



# eRF1 Peptide chain release factor 1 (eRF1)

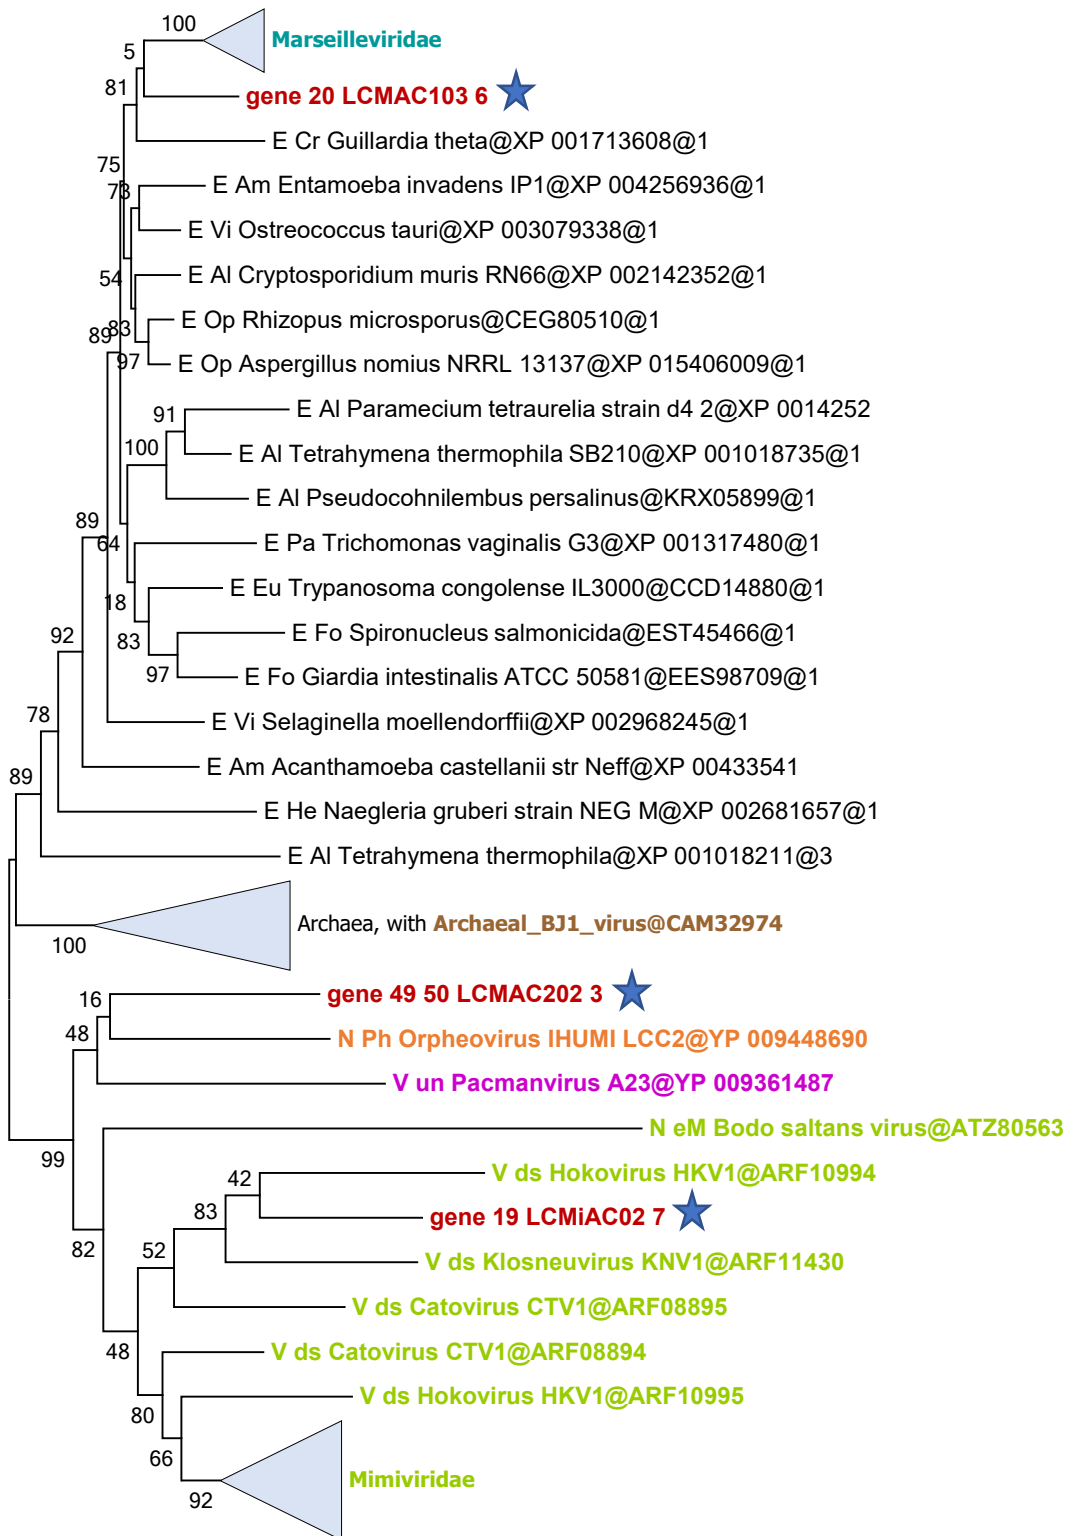

0.2

# RLI1 Translation initiation factor RLI1

in Archaea: ribosome biogenesis/translation initiation ATPase RLI

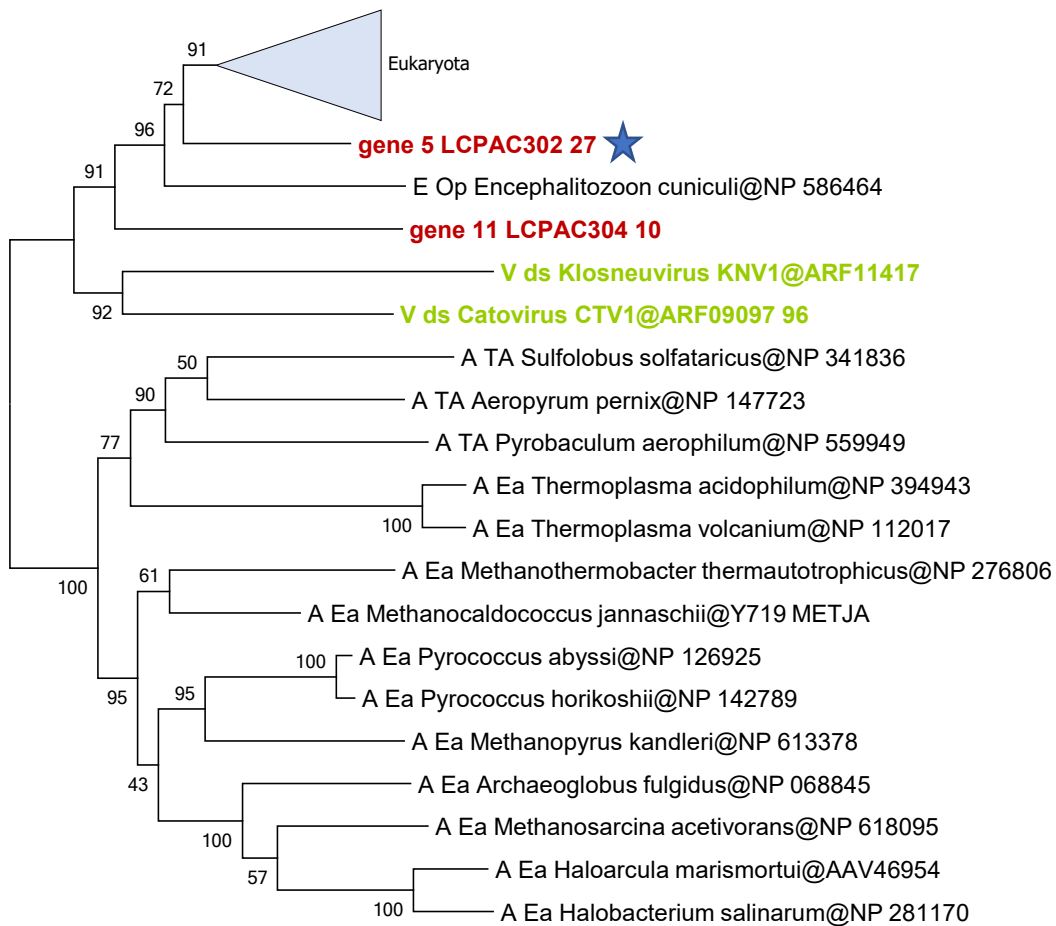

0.1

# eIF1a Translation initiation factor 1A / IF-1 (eIF-1A for eukaryotes)

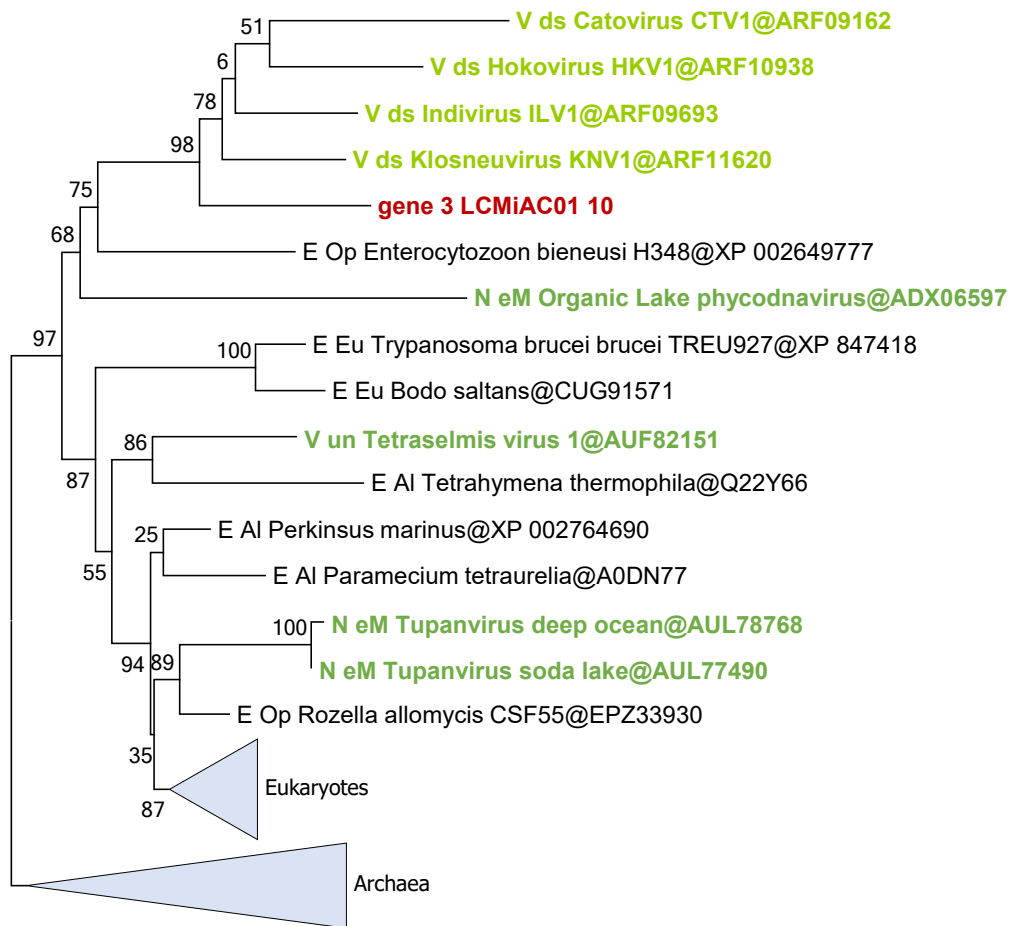

# LCV contigs containing a translation protein and a 'bona fide' NCLDV protein, as defined by PIM clusters

|             |                                                                                                                                     |         |             |         |
|-------------|-------------------------------------------------------------------------------------------------------------------------------------|---------|-------------|---------|
| LCMAC101_1  | pim0002,pim0003,pim0004,pim0007,pim0008,pim0011,pim0014,pim0022,<br>pim0027,pim0030,pim0031,pim0053,pim0054,pim0136,pim0142,pim0144 |         |             |         |
| LCMAC101_2  | pim0001,pim0005,pim0013                                                                                                             |         |             |         |
| LCMAC103_1  | pim0011,pim0027,pim0054                                                                                                             |         |             |         |
| LCMAC103_3  | pim0005,pim0142                                                                                                                     |         |             |         |
| LCMAC103_4  | pim0002,pim0003,pim0030                                                                                                             |         |             |         |
| LCPAC404_2  | pim0004,pim0005,pim0011,pim0013                                                                                                     |         |             |         |
| LCMAC201_11 | pim0004,pim0014                                                                                                                     |         |             |         |
| LCMAC202_1  | pim0004,pim0014,pim0022,pim0027,pim0144                                                                                             |         |             |         |
| LCMAC202_10 | pim0002,pim0031                                                                                                                     |         |             |         |
| LCMAC202_18 | pim0001,pim0013                                                                                                                     |         |             |         |
| LCMAC202_3  | pim0004,pim0014,pim0054                                                                                                             |         |             |         |
| LCMAC202_4  | pim0007,pim0053,pim0136                                                                                                             |         |             |         |
| LCMAC202_6  | pim0003,pim0008,pim0011,pim0030                                                                                                     |         |             |         |
| LCPAC001_1  | pim0001,pim0016,pim0030,pim0136                                                                                                     |         |             |         |
| LCPAC001_11 | pim0004,pim0019                                                                                                                     |         |             |         |
| LCPAC101_2  | pim0027,pim0030,pim0035                                                                                                             |         |             |         |
| LCMAC103_5  | pim0004                                                                                                                             |         |             |         |
| LCMAC201_16 | pim0054                                                                                                                             |         |             |         |
| LCMAC201_3  | LCPAC103_3                                                                                                                          | pim0042 | LCMAC202_12 | pim0224 |
| LCMAC201_4  | LCMAC202_1                                                                                                                          | pim0042 | LCMAC101_1  | pim0224 |
| LCPAC101_20 | LCPAC202_5                                                                                                                          | pim0042 | LCMAC103_6  | pim0224 |
| LCPAC101_21 | LCPAC302_16                                                                                                                         | pim0042 | LCDPAC01_16 | pim0224 |
| LCPAC304_1  | LCPAC102_1                                                                                                                          | pim0042 | LCPAC401_2  | pim0015 |
| LCPAC304_11 | LCPAC201_4                                                                                                                          | pim0042 | LCPAC403_1  | pim0015 |
| LCPAC304_5  | LCMAC101_1                                                                                                                          | pim0042 | LCPAC104_1  | pim0015 |
| LCPAC202_1  | CPAC101_5                                                                                                                           | pim0042 | LCMAC101_5  | pim0015 |
| LCPAC201_6  | LCMAC102_1                                                                                                                          | pim0042 | LCDPAC02_3  | pim0015 |
| LCPAC101_1  | LCMAC201_17                                                                                                                         | pim0042 | LCPAC202_1  | pim0015 |
| LCPAC302_27 | LCPAC104_2                                                                                                                          | pim0042 | LCPAC201_6  | pim0015 |
| LCPAC104_3  | LCPAC304_2                                                                                                                          | pim0042 | LCPAC304_7  | pim0015 |
| LCPAC103_11 | LCMAC202_10                                                                                                                         | pim0071 | LCPAC103_1  | pim0015 |
| LCPAC304_5  | LCPAC202_1                                                                                                                          | pim0071 | LCMAC201_4  | pim0015 |
| LCPAC201_3  | LCMAC101_1                                                                                                                          | pim0071 | LCIVAC01_1  | pim0015 |
| LCPAC202_4  | LCPAC201_1                                                                                                                          | pim0071 | LCPAC101_2  | pim0015 |
| LCPAC403_2  | LCIVAC01_6                                                                                                                          | pim0071 | LCMAC102_1  | pim0015 |
| LCPAC001_4  | LCDPAC02_1                                                                                                                          | pim0071 | LCPAC406_7  | pim0015 |
| LCPAC103_11 | LCDPAC01_10                                                                                                                         | pim0071 | LCPAC404_1  | pim0015 |
| LCPAC101_2  | LCMAC201_7                                                                                                                          | pim0071 | LCMAC103_8  | pim0015 |
| LCPAC401_3  | LCPAC103_7                                                                                                                          | pim0071 | LCMAC202_11 | pim0015 |
| LCPAC406_1  | LCMAC201_10                                                                                                                         | pim0224 | LCPAC001_6  | pim0015 |
| LCPAC001_4  | LCMAC102_1                                                                                                                          | pim0224 | LCPAC302_19 | pim0015 |
| LCDPAC01_7  | LCPAC304_5                                                                                                                          | pim0224 | LCDPAC01_8  | pim0015 |

## PIM cluster annotations

|         |                                                                 |
|---------|-----------------------------------------------------------------|
| pim0001 | NCLDV major capsid protein                                      |
| pim0002 | DNA polymerase elongation subunit family B                      |
| pim0003 | packaging ATPase                                                |
| pim0004 | DNA-directed RNA polymerase subunit alpha                       |
| pim0005 | DNA-directed RNA polymerase subunit beta                        |
| pim0007 | DNA-directed RNA polymerase subunit 5                           |
| pim0008 | A18-like helicase                                               |
| pim0011 | Flap endonuclease                                               |
| pim0013 | Poxvirus Late Transcription Factor VLTF3                        |
| pim0014 | Erv1/Alr family disulfide (thiol) oxidoreductase                |
| pim0015 | DNA topoisomerase II                                            |
| pim0016 | YqaJ viral recombinase                                          |
| pim0019 | DNA primase                                                     |
| pim0022 | D5-like helicase-primase                                        |
| pim0027 | mRNA capping enzyme                                             |
| pim0030 | T4 phage RNA ligase with polynucleotide kinase domain           |
| pim0031 | RuvC, Holliday junction resolvases (HJRs)                       |
| pim0035 | FtsJ-like methyltransferase                                     |
| pim0042 | Ribonuclease III                                                |
| pim0053 | ribonucleoside diphosphate reductase, large subunit             |
| pim0054 | ribonucleoside diphosphate reductase, beta subunit              |
| pim0071 | deoxynucleotide monophosphate kinase                            |
| pim0116 | pfam03003: Pox_G9-A16 ; Pox virus entry-fusion-complex G9/A16   |
| pim0134 | uncharacterized transmembrane protein conserved in pithoviruses |
| pim0136 | Poxvirus early transcription factor (VETF), large subunit       |
| pim0142 | L1R_F9L; Lipid membrane protein of large eukaryotic DNA viruses |
| pim0144 | transcription initiation factor IIB                             |
| pim0192 | protein kinase conserved in pithoviruses                        |
| pim0224 | thermonuclease/nuclease                                         |

## LCV contigs containing a translation protein and a 'bona fide' NCLDV protein, as defined by NCVOG and/or top blastp hits

|             |                                                                           |
|-------------|---------------------------------------------------------------------------|
| LCMiAC02_3  | D5-like helicase-primase (NCVOG0023)                                      |
| LCMiAC01_1  | NCLDV major capsid protein (NCVOG0022)                                    |
| LCMiAC02_12 | DNA-directed RNA polymerase subunit alpha (NCVOG0274)                     |
| LCMiAC01_18 | DNA-directed RNA polymerase subunit alpha (NCVOG0274)                     |
| LCMiAC01_2  | mRNA capping enzyme (NCVOG1451)                                           |
| LCMiAC01_5  | Phosphoinositide 3-kinase (NCVOG0242)                                     |
| LCMiAC01_9  | gene_16_LCMiAC01_9 is similar to TROVE domain protein [Klosneuvirus KNV1] |
| LCMiAC02_7  | polynucleotide kinase-3'-phosphatase (NCVOG0243)                          |
