# Supplementary material for: Virus Genomes from Deep Sea Sediments Expand the Ocean Megavirome and Support Independent Origins of Viral Gigantism
Source: PubMed Central journal article supplement (PMC6401483; doi:10.1128/mbio.02497-18), 2019-03-05
Supplement: mBio.02497-18-s0005.pdf [file mBio.02497-18-s0005.pdf]

This file contains data on frequencies of the most conserved motif (probable early promoter) through contigs of Loki Marseillevirus and Mimivirus bins (namely, LCMAC101,102,103, LCMAC201, 202, and LCMiAC01 and 02)

# Loki Marseillevirus promoter

# LCMAC101, 102, 103

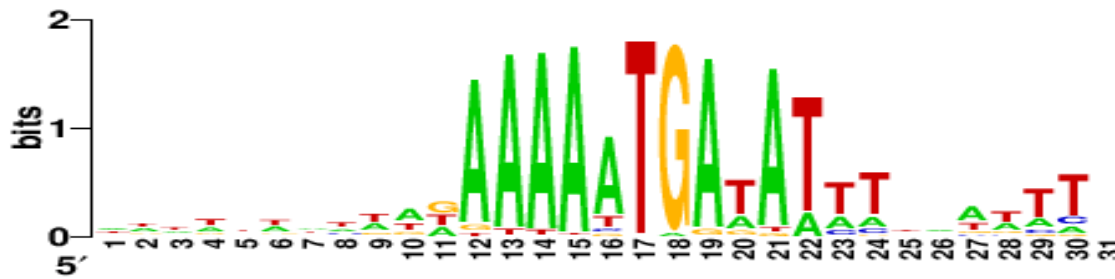

| bin/org  | # of contigs | min contig length, nt | max contig length, nt | total genome length, nt | # of proteins |
|----------|--------------|-----------------------|-----------------------|-------------------------|---------------|
| LCMAC101 | 7            | 15190                 | 393561                | 763048                  | 793           |
| LCMAC102 | 1            | 395459                | 395459                | 395459                  | 465           |
| LCMAC103 | 9            | 14346                 | 69824                 | 389984                  | 427           |

| contig   | upstream regions | upstr.reg.with promoter | percent |
|----------|------------------|-------------------------|---------|
| MAC102_1 | 464              | 208                     | 45      |
| MAC101_1 | 392              | 140                     | 36      |
| MAC101_2 | 231              | 66                      | 29      |
| MAC101_3 | 62               | 24                      | 39      |
| MAC101_4 | 32               | 16                      | 50      |
| MAC101_5 | 26               | 3                       | 12      |
| MAC101_6 | 29               | 9                       | 31      |
| MAC101_7 | 15               | 8                       | 53      |
| MAC103_1 | 82               | 34                      | 41      |
| MAC103_2 | 61               | 23                      | 38      |
| MAC103_3 | 57               | 27                      | 47      |
| MAC103_4 | 75               | 31                      | 41      |
| MAC103_5 | 43               | 15                      | 35      |
| MAC103_6 | 47               | 17                      | 36      |
| MAC103_7 | 25               | 15                      | 60      |
| MAC103_8 | 15               | 7                       | 47      |
| MAC103_9 | 17               | 6                       | 35      |

# Loki Marseillevirus promoter

# LCMAC101, 102, 103

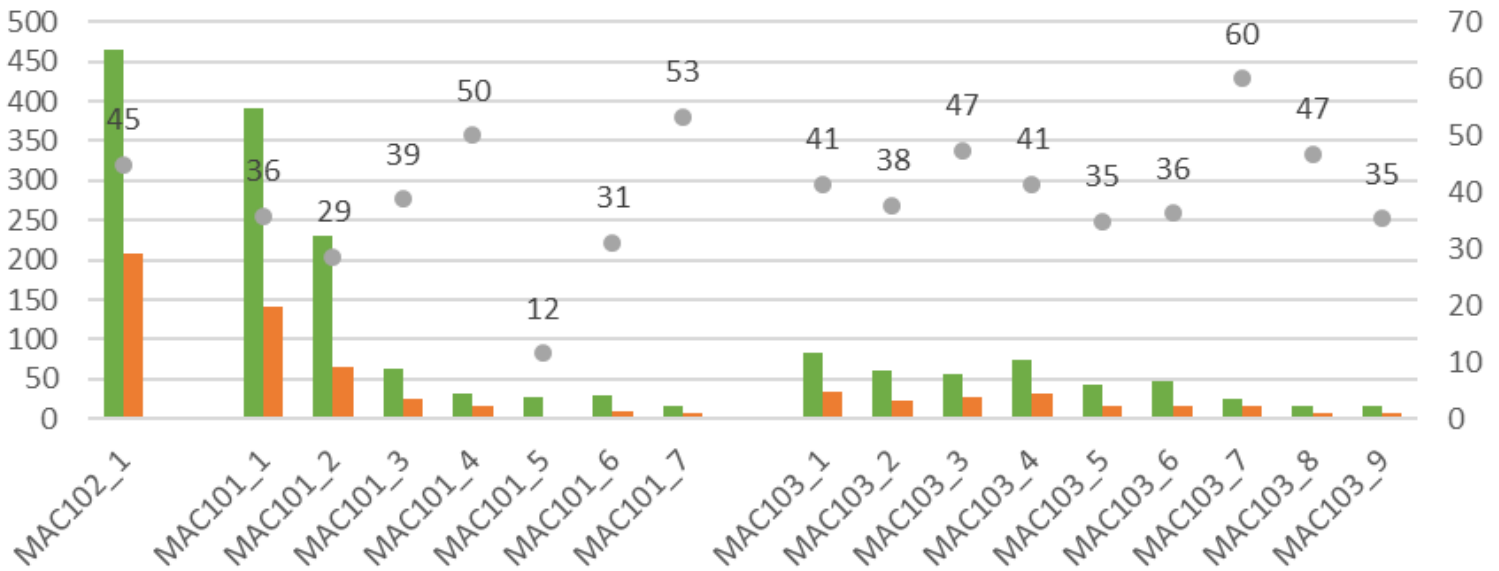

- # of upstream regions
- # of upstream regions with the promoter
- percent

| contig   | upstream regions | upstr.reg.with promoter | percent |
|----------|------------------|-------------------------|---------|
| MAC102_1 | 464              | 208                     | 45      |
| MAC101_1 | 392              | 140                     | 36      |
| MAC101_2 | 231              | 66                      | 29      |
| MAC101_3 | 62               | 24                      | 39      |
| MAC101_4 | 32               | 16                      | 50      |
| MAC101_5 | 26               | 3                       | 12      |
| MAC101_6 | 29               | 9                       | 31      |
| MAC101_7 | 15               | 8                       | 53      |
| MAC103_1 | 82               | 34                      | 41      |
| MAC103_2 | 61               | 23                      | 38      |
| MAC103_3 | 57               | 27                      | 47      |
| MAC103_4 | 75               | 31                      | 41      |
| MAC103_5 | 43               | 15                      | 35      |
| MAC103_6 | 47               | 17                      | 36      |
| MAC103_7 | 25               | 15                      | 60      |
| MAC103_8 | 15               | 7                       | 47      |
| MAC103_9 | 17               | 6                       | 35      |

# Loki Marseillevirus promoter

# LCMAC201, 202 – “deep” marseilleviruses

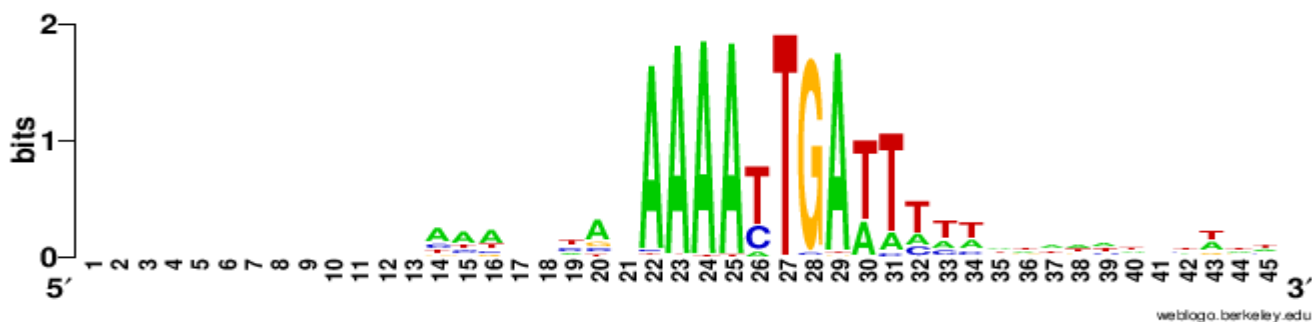

| bin/org  | # of contigs | min contig length, nt | max contig length, nt | total genome length, nt | # of proteins |
|----------|--------------|-----------------------|-----------------------|-------------------------|---------------|
| LCMAC201 | 25           | 6728                  | 57873                 | 565697                  | 566           |
| LCMAC202 | 19           | 6906                  | 153726                | 705352                  | 672           |

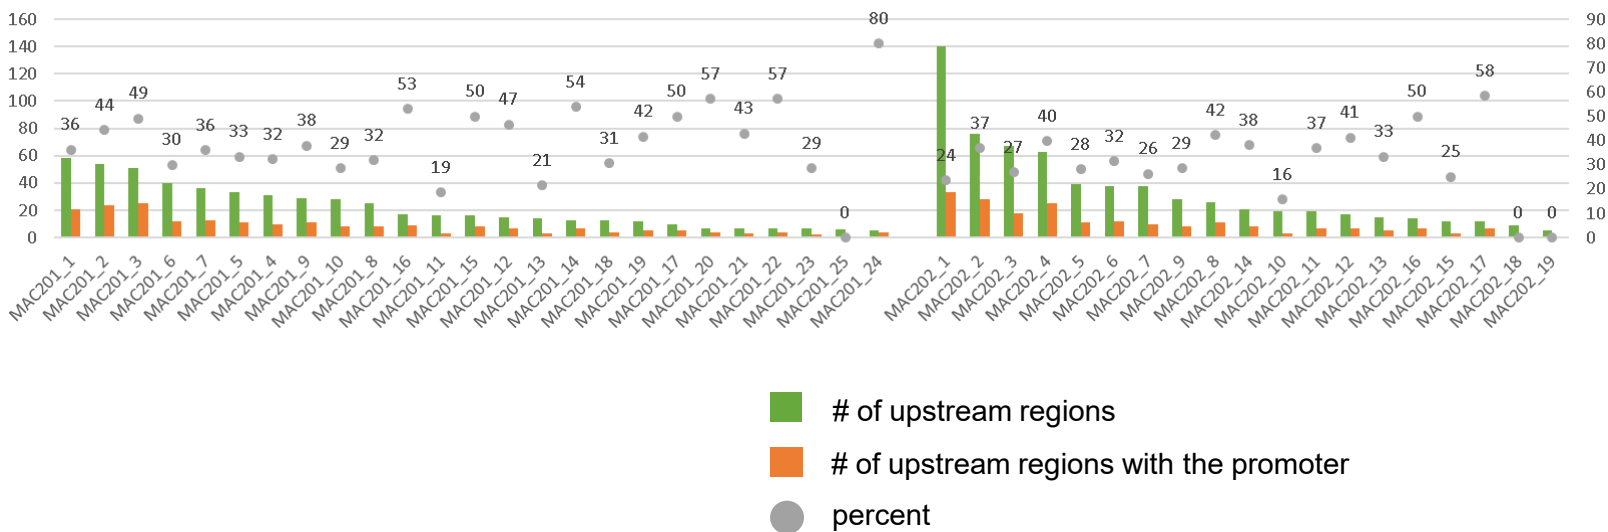

# Loki Mimivirus promoter

# LCMiAC01, 02

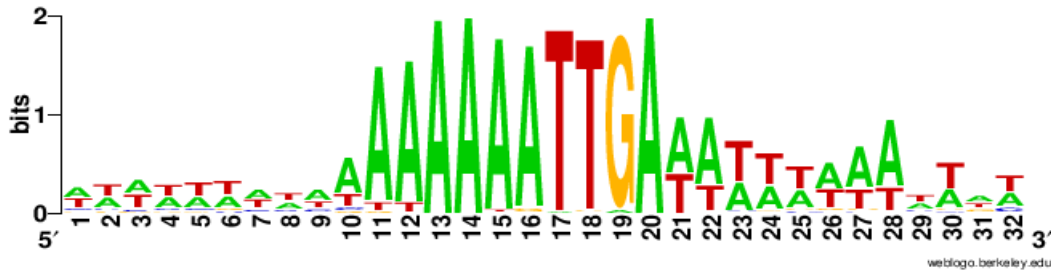

| bin/org  | # of contigs | min contig length, nt | max contig length, nt | total genome length, nt | # of proteins |
|----------|--------------|-----------------------|-----------------------|-------------------------|---------------|
| LCMiAC01 | 18           | 8458                  | 85120                 | 672112                  | 571           |
| LCMiAC02 | 21           | 8237                  | 131456                | 642939                  | 583           |

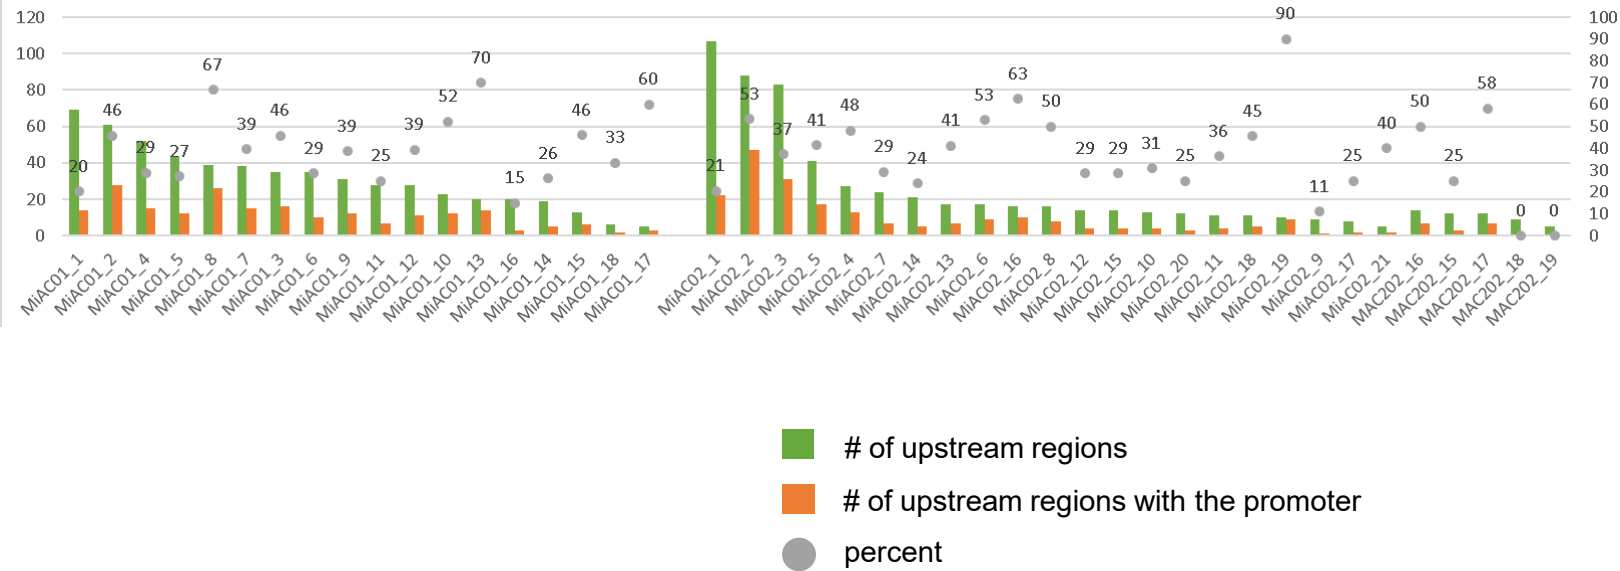

- # of upstream regions
- # of upstream regions with the promoter
- percent
