# Supplementary material for: Virus Genomes from Deep Sea Sediments Expand the Ocean Megavirome and Support Independent Origins of Viral Gigantism
Source: PubMed Central journal article supplement (PMC6401483; doi:10.1128/mbio.02497-18), 2019-03-05
Supplement: mBio.02497-18-s0007.pdf [file mBio.02497-18-s0007.pdf]

This file contains meme motif search results for Loki Castle Viruses of Pithovirus group

Pithovirus sibericum (NC\_023423.1), Cedratvirus A11 (NC\_032108.1), and Orpheovirus (NC\_036594.1) are included

The 'upstream' regions are from -250 to 30 nt related to the start codon; the regions shorter than 50 nt are filtered out

Meme search was set to 25 nt of motif width

Upstream region sequences and meme output files can be found at:  
[ftp://ftp.ncbi.nih.gov/pub/yutin/Loki\\_Castle\\_NCLDV\\_2018/meme\\_motif\\_search](ftp://ftp.ncbi.nih.gov/pub/yutin/Loki_Castle_NCLDV_2018/meme_motif_search)

Conserved motifs AAA(T/A)TGA are marked with the 'sun' sign  
Conserved AT-rich motifs are marked with the 'moon' sign

*note: on all Logo images, the detected motif starts from position #11*



# LCPAC201\_202

654 fragments

## Motif #3 (70 sites)

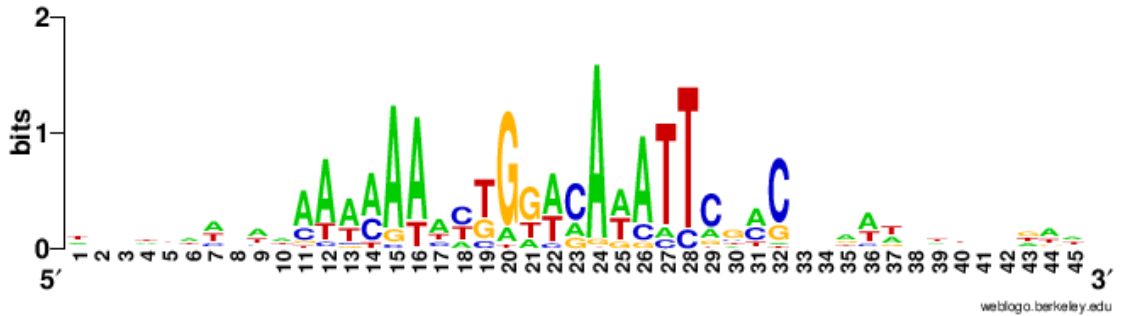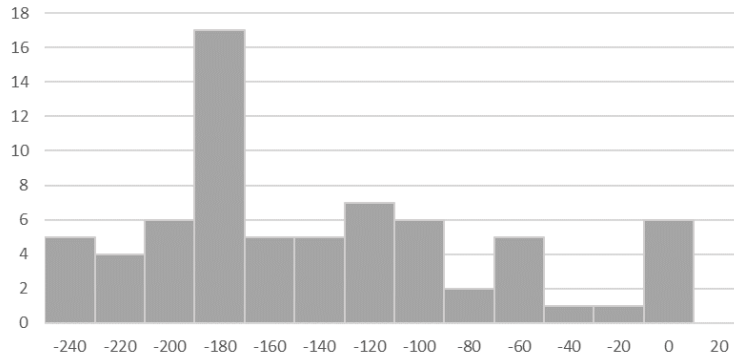

## Motif #4 (70 sites)

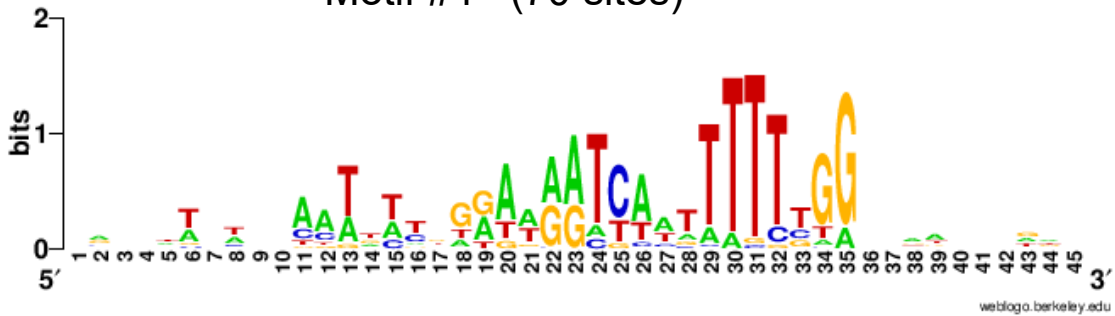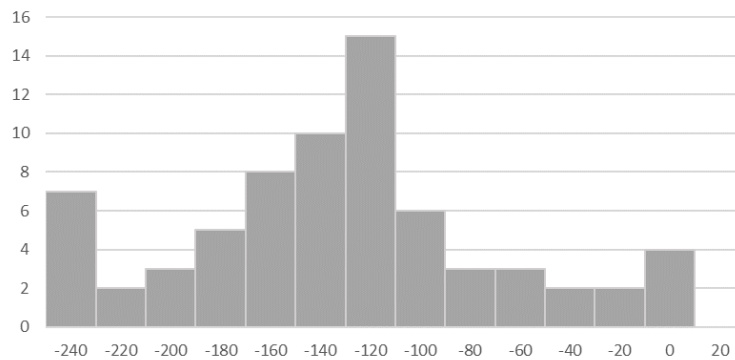



# LCPAC104

763 fragments

## Motif #1 (54 sites)

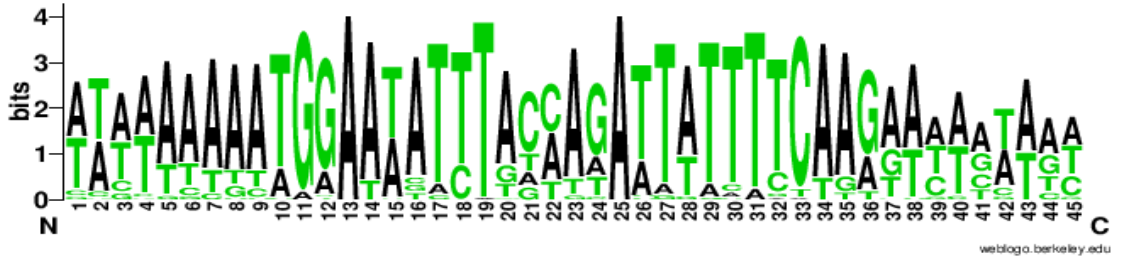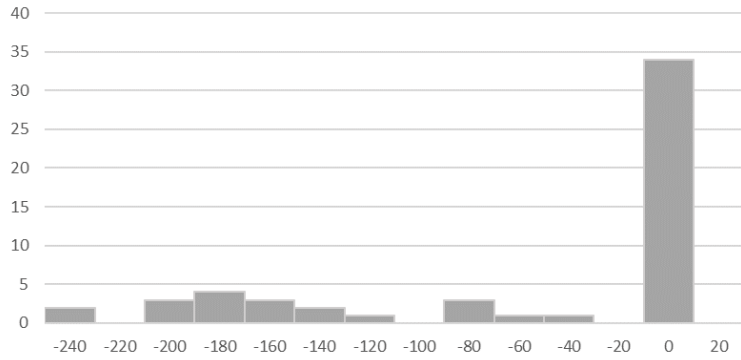

## Motif #2 (86 sites)

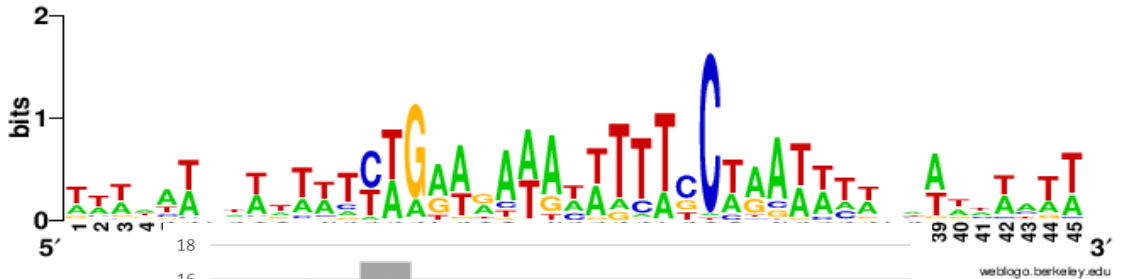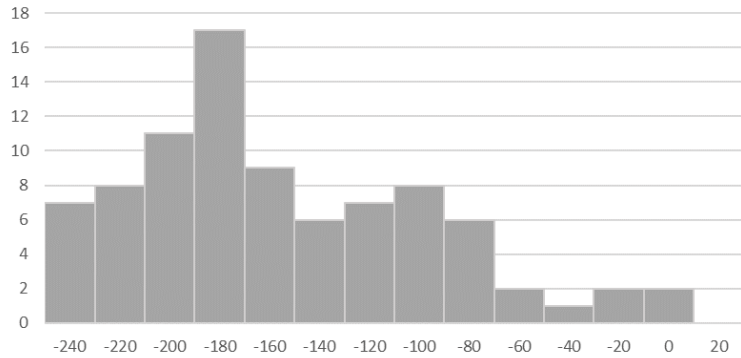

# LCPAC104

763 fragments

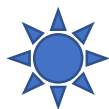

## Motif #3 (151 sites)

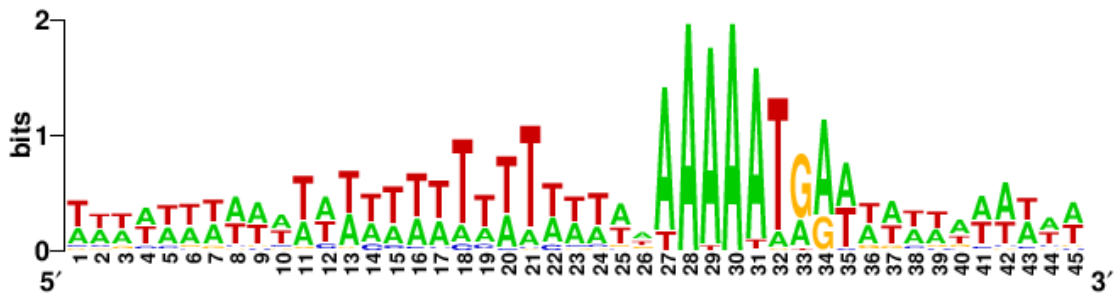

weblogo.berkeley.edu

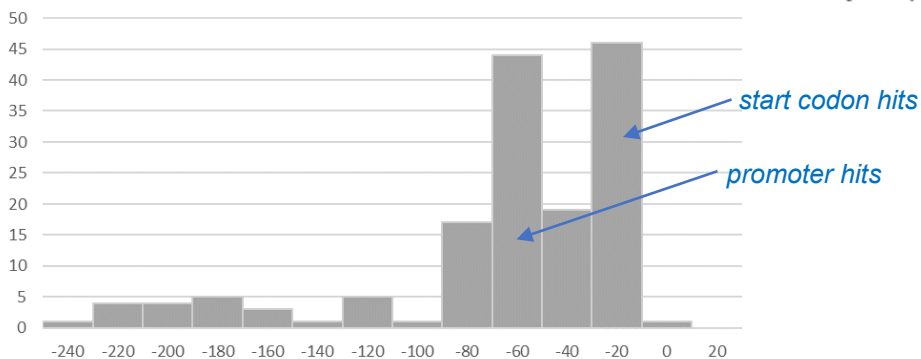

## Motif #7 (53 sites)

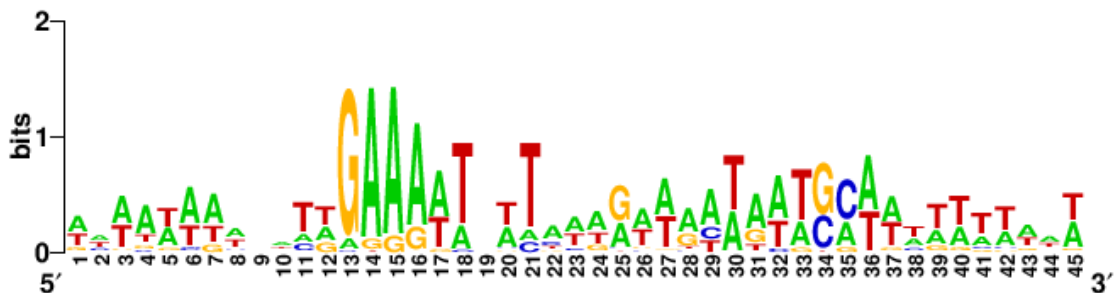

weblogo.berkeley.edu

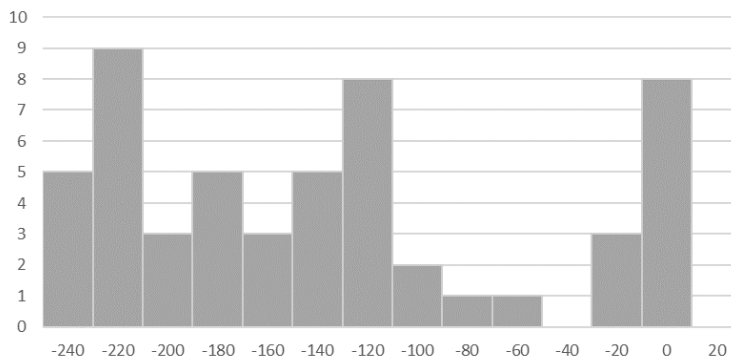

# LCPAC101\_102\_103

763 fragments

## Motif #1 (247 sites)

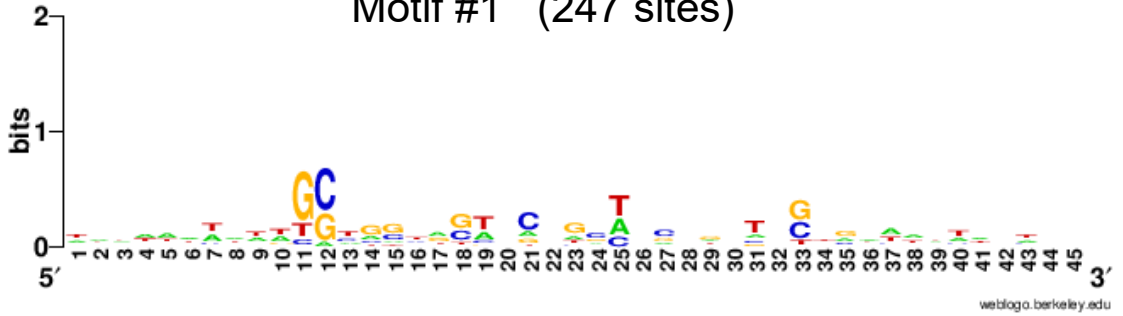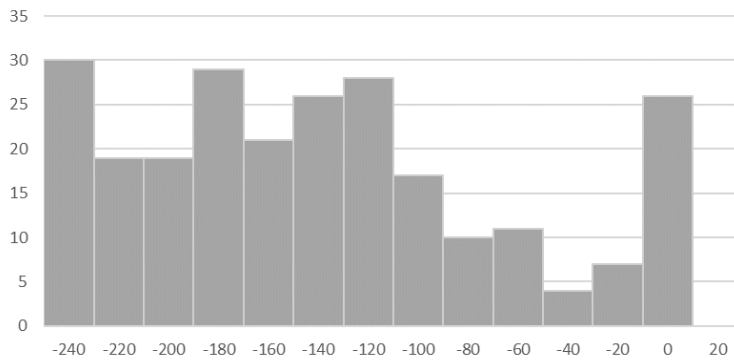

## Motif #2 (540 sites)

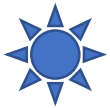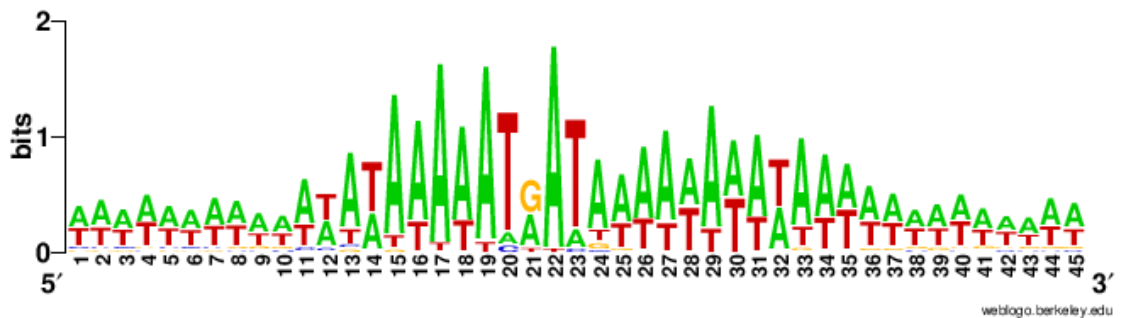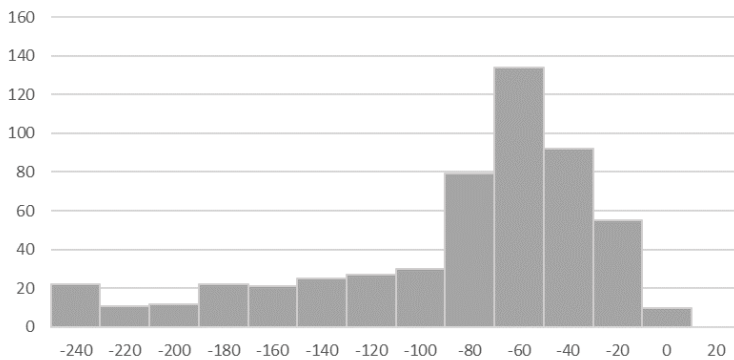

# LCPAC101\_102\_103

763 fragments

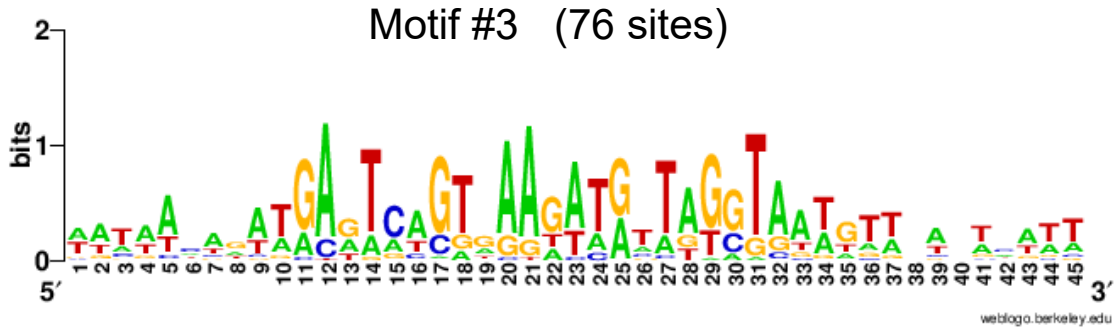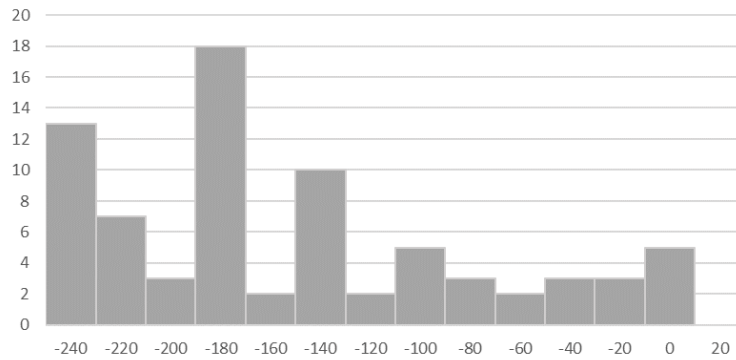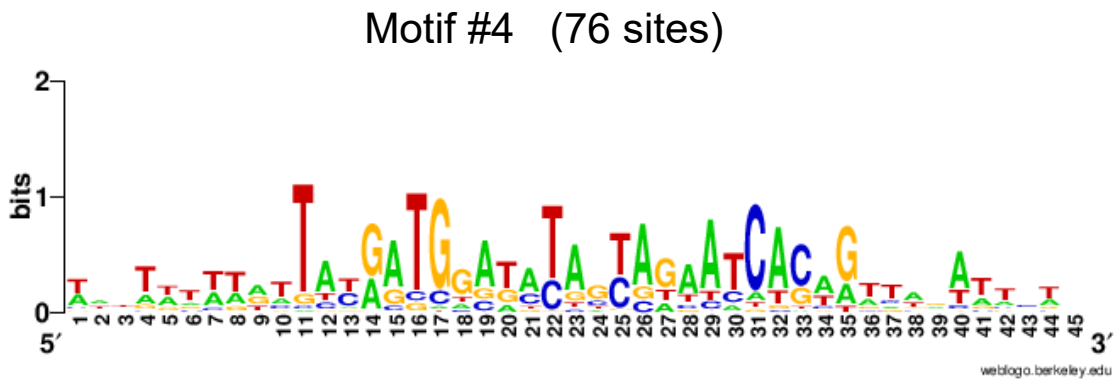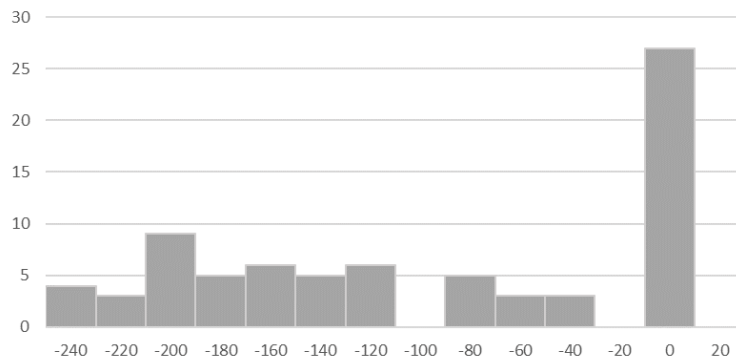



# LCPAC101\_102\_103

763 fragments

## Motif #5 (76 sites)

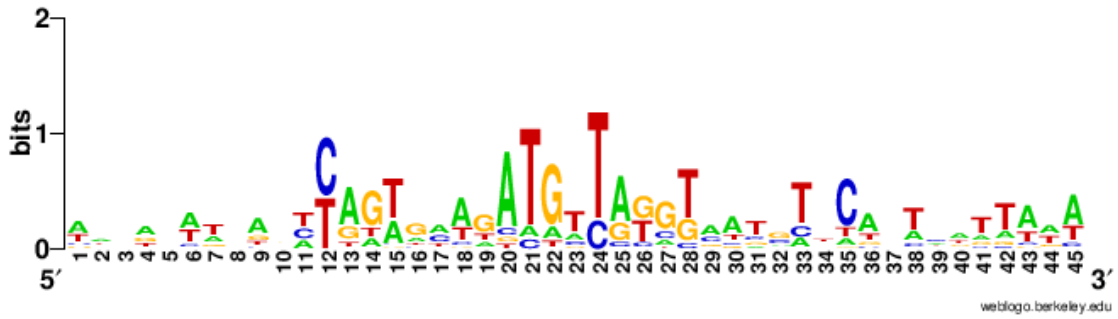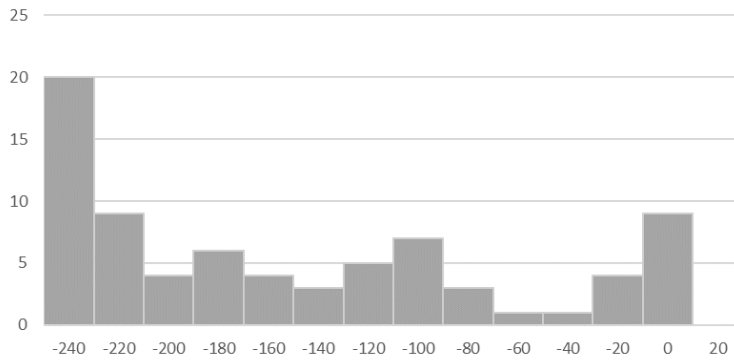

## Motif #6 (443 sites)

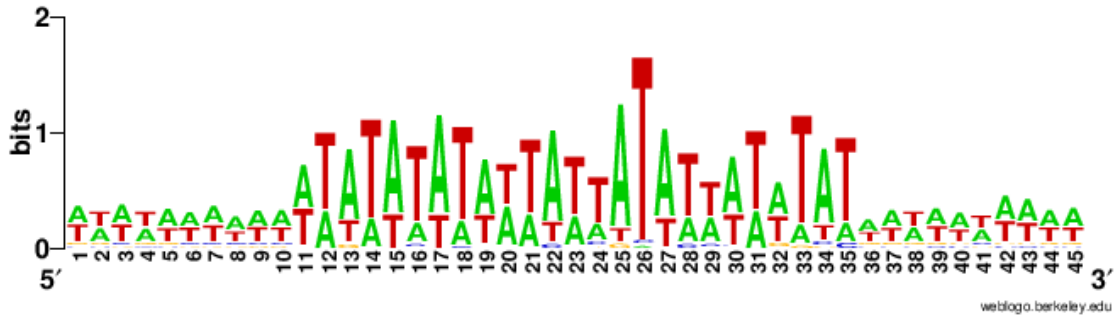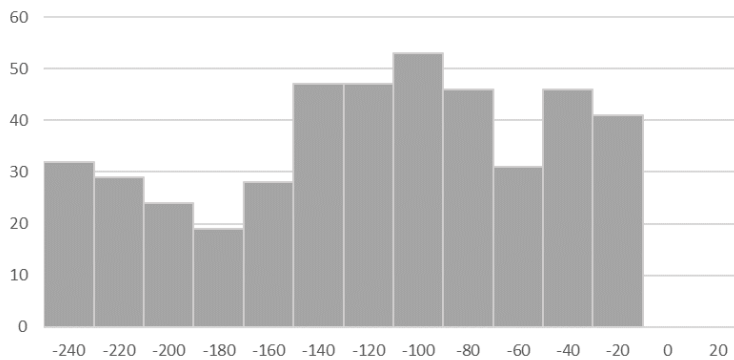

# LCPAC103

177 fragments

## Motif #1 (50 sites)

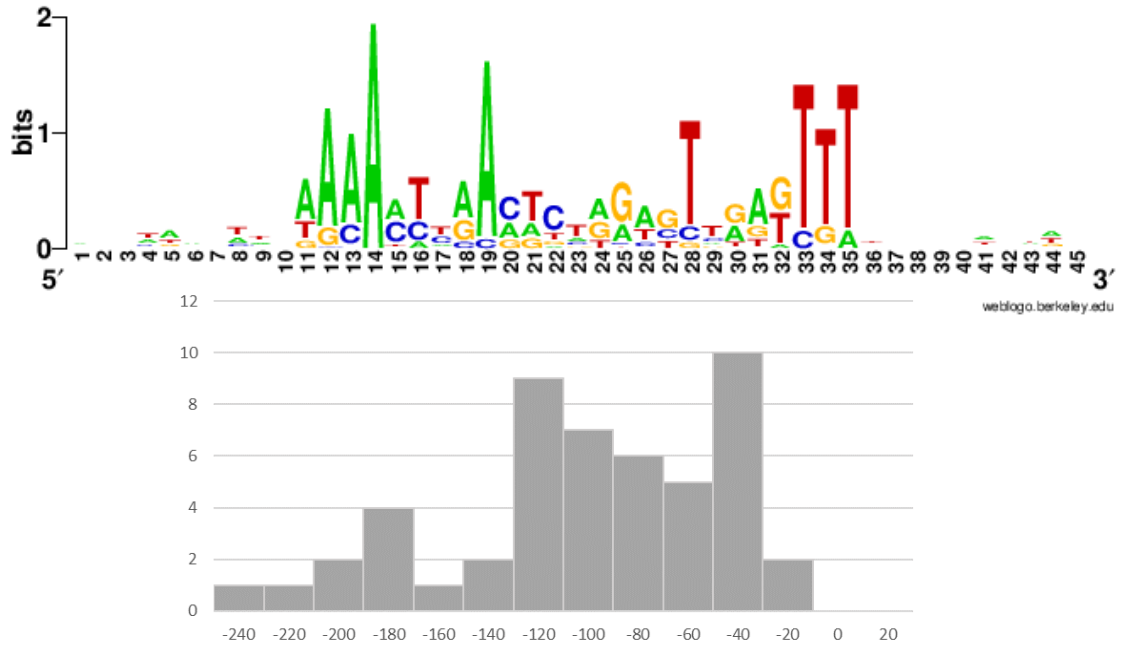

## Motif #2 (61 sites)

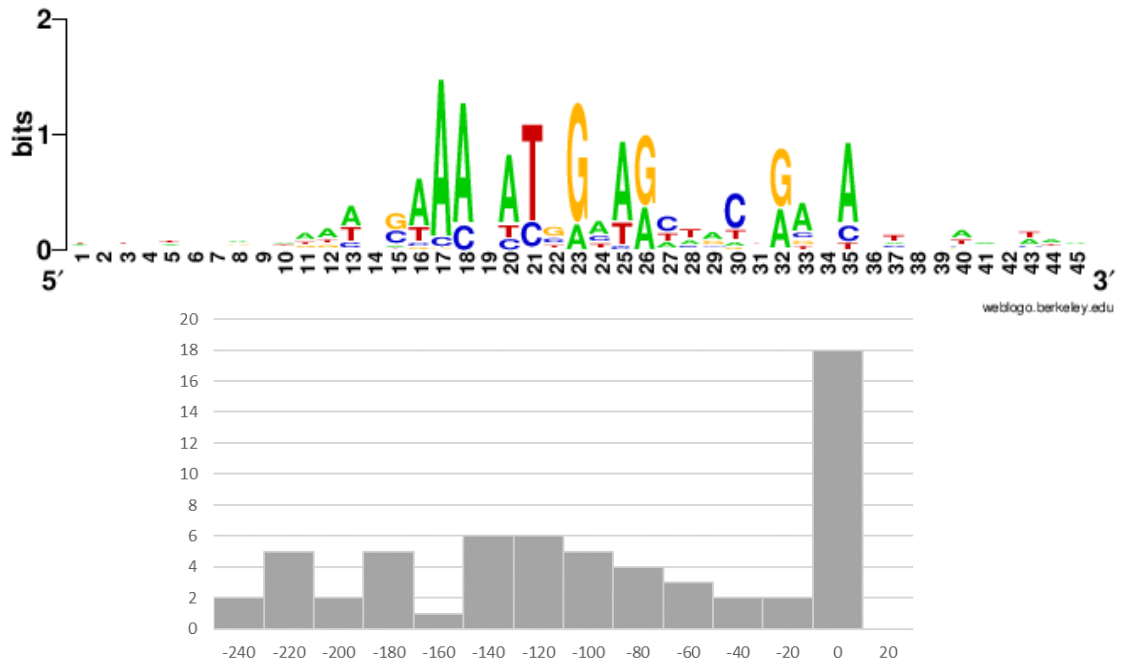

# LCPAC103

177 fragments

## Motif #3 (59 sites)

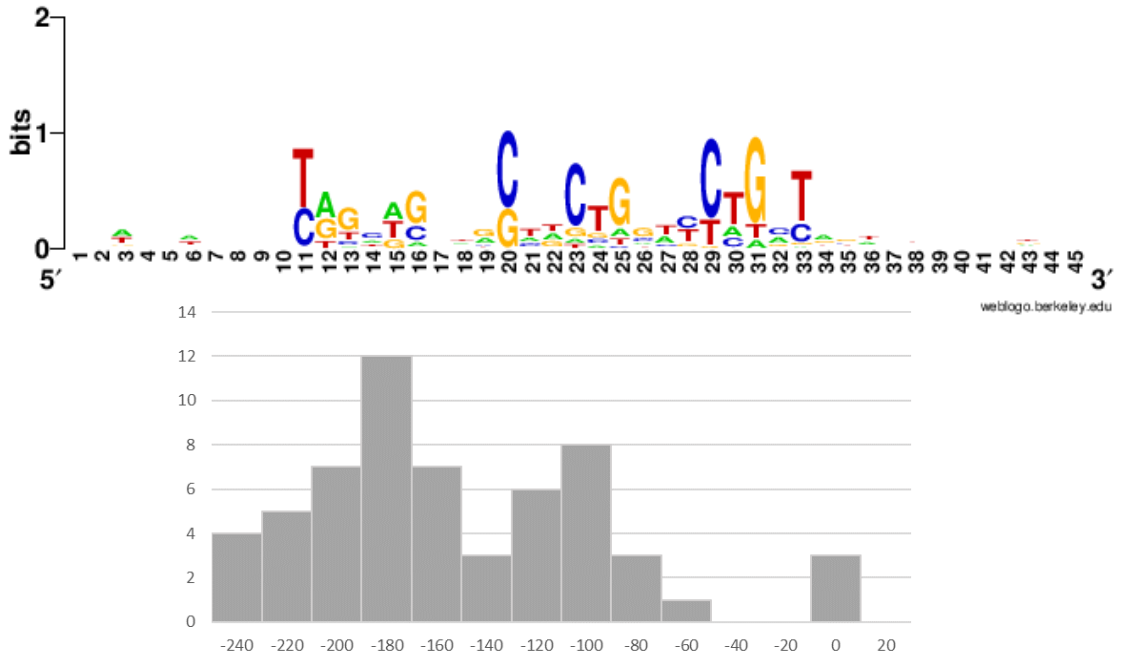

## Motif #4 (62 sites)

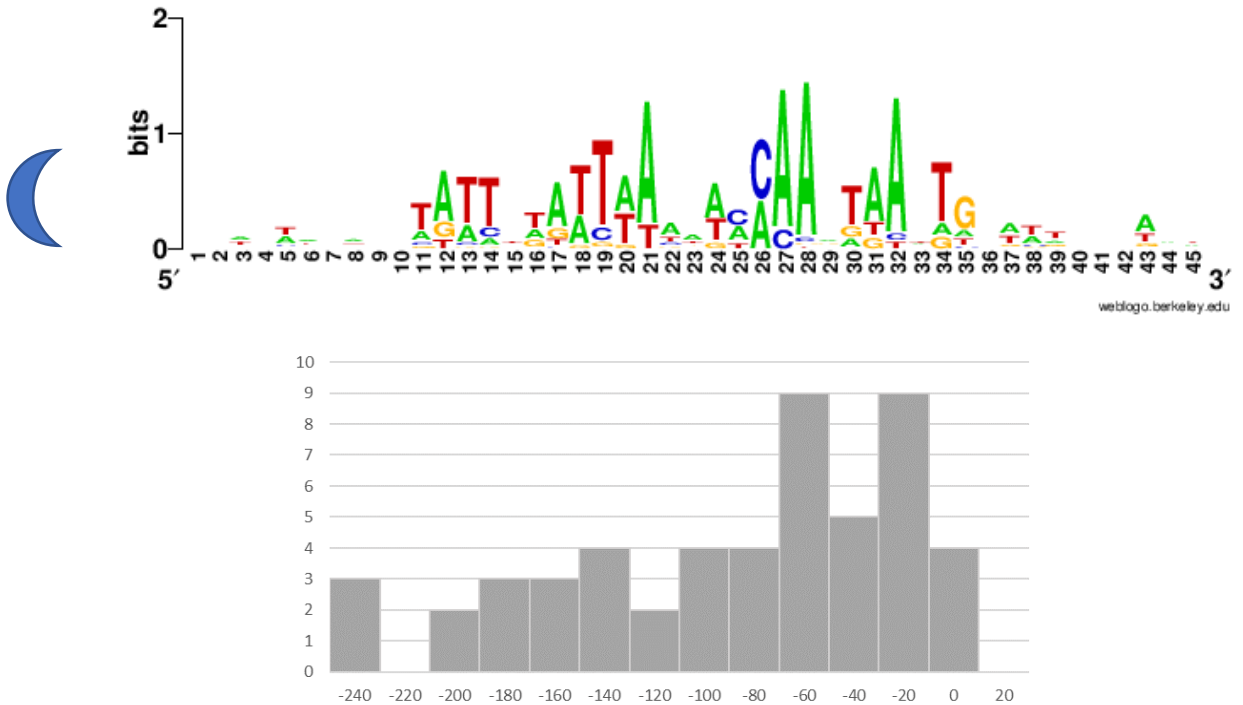

# LCPAC103

177 fragments

## Motif #5 (52 sites)

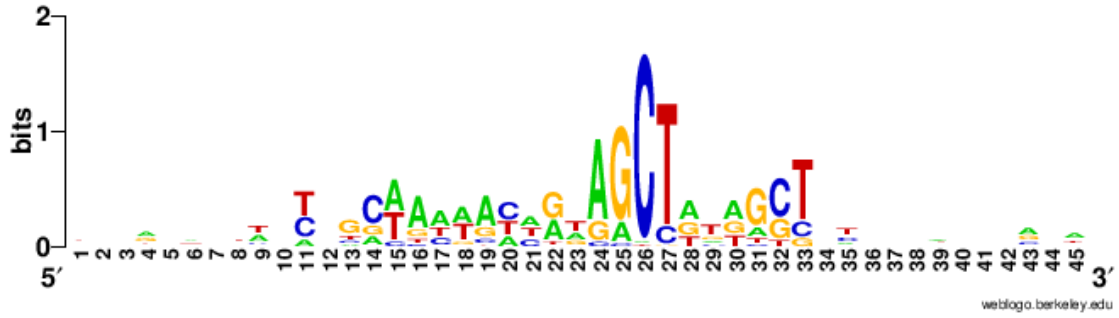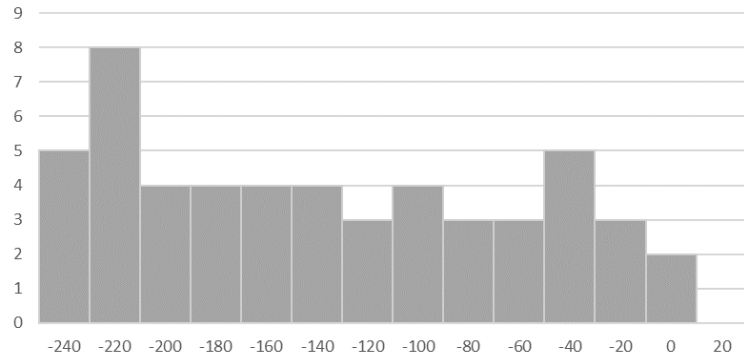



# LCPAC101\_102

586 fragments

## Motif #3 (103 sites)

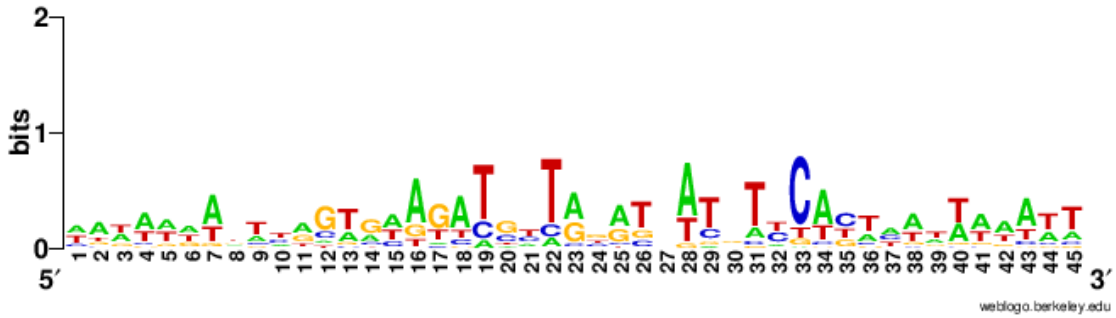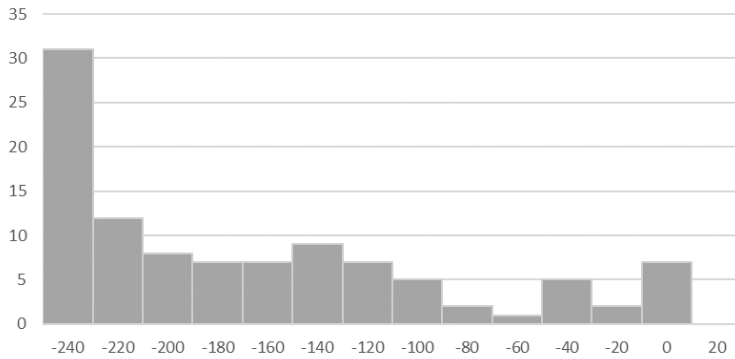

## Motif #4 (101 sites)

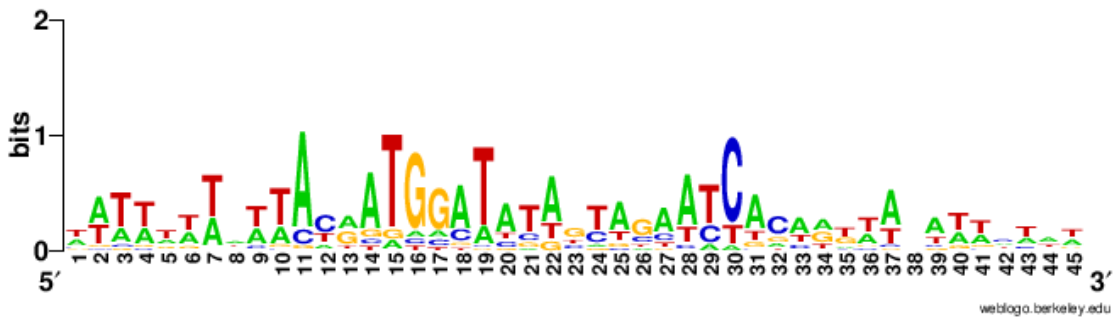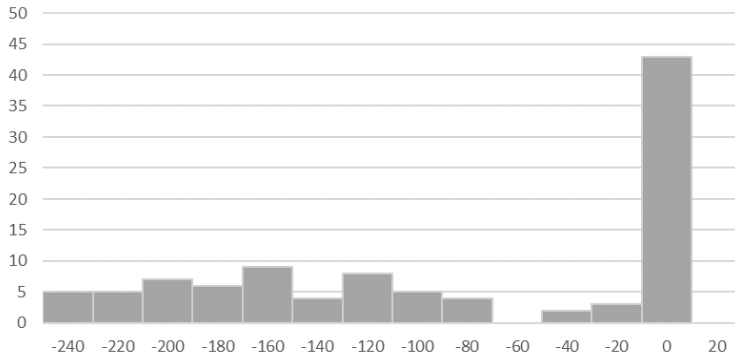

# LCPAC101\_102

586 fragments

## Motif #5 (374 sites)

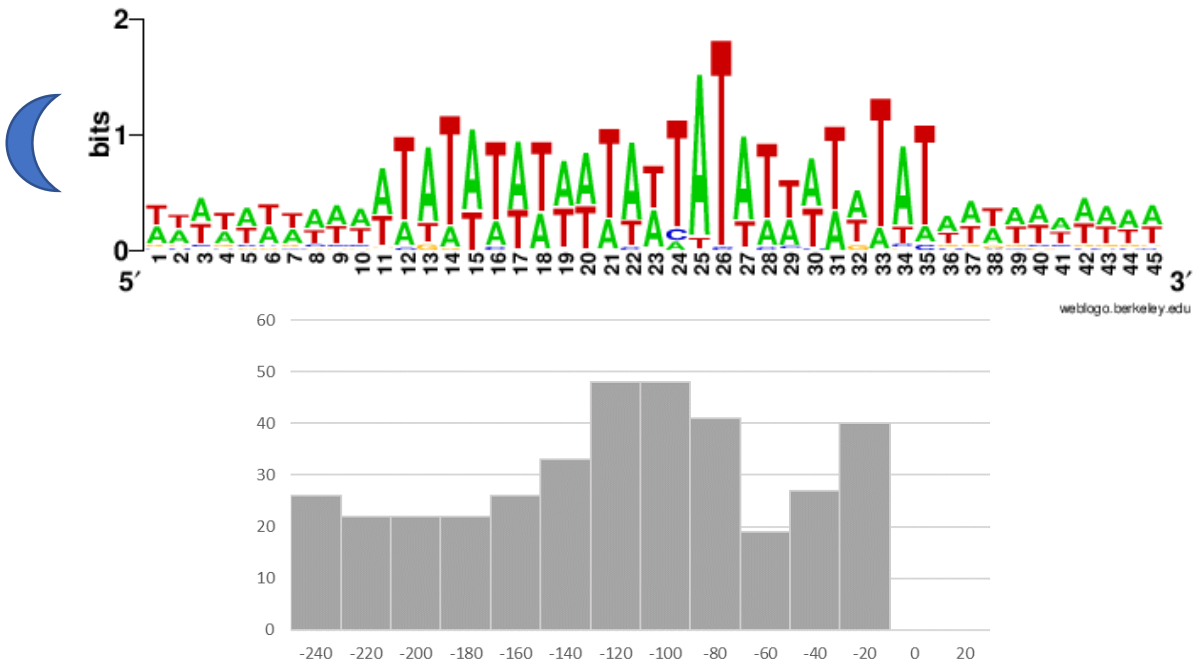

## Motif #9 (101 sites)

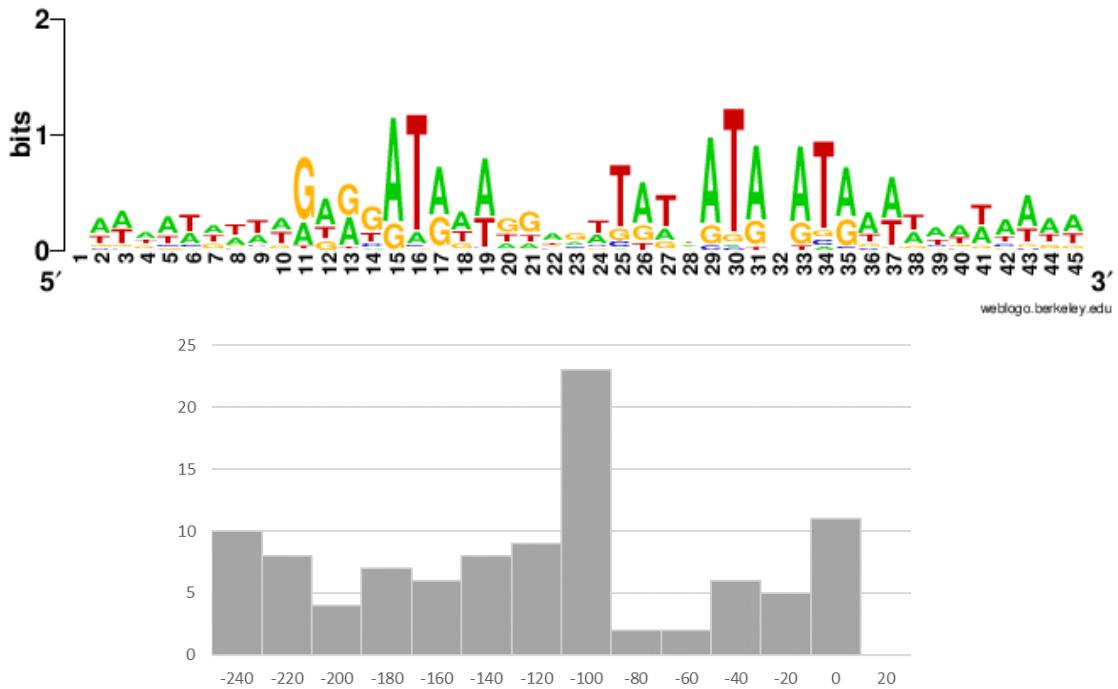

# LCPAC302\_304

949 fragments

## Motif #1 (211 sites)

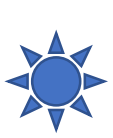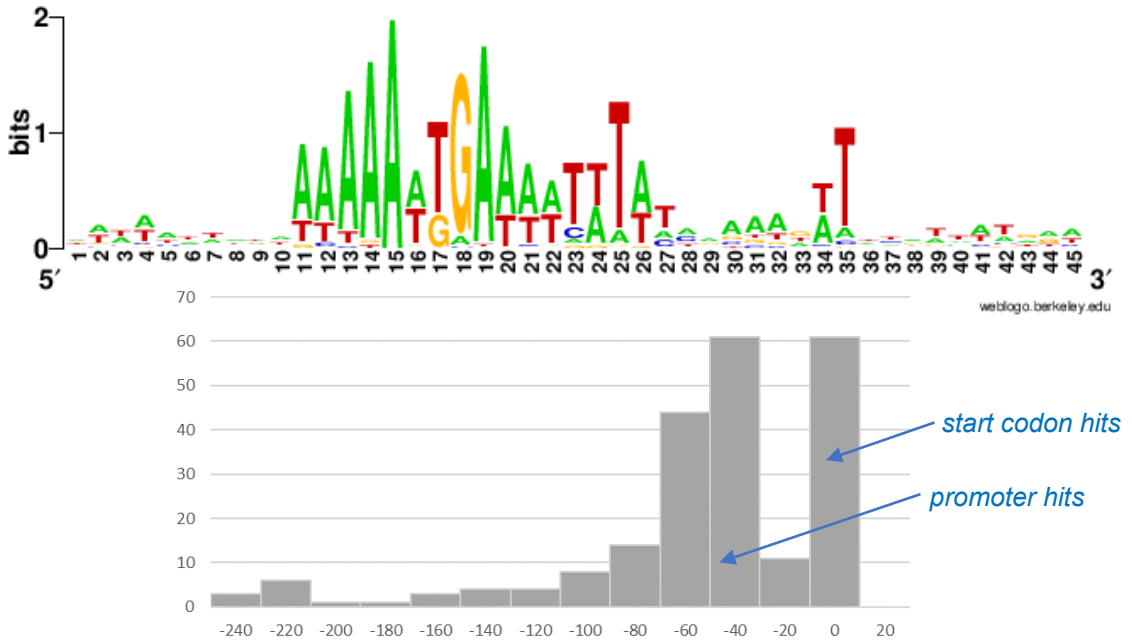

## Motif #2 (110 sites)

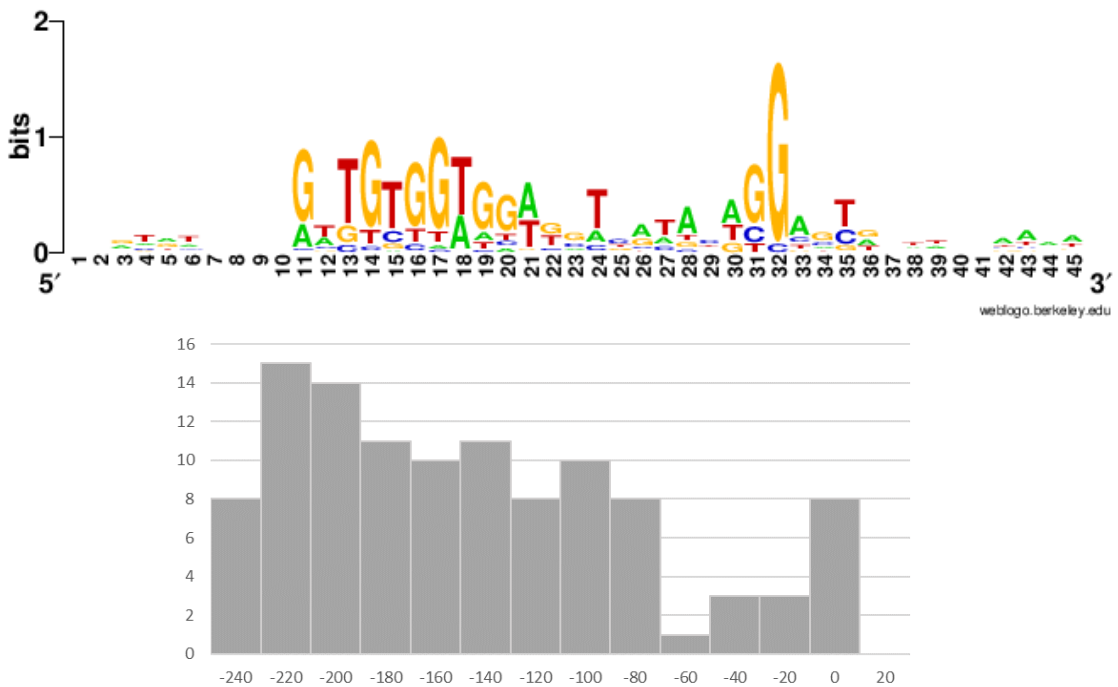



# LCPAC302\_304

949 fragments

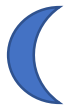

## Motif #3 (263 sites)

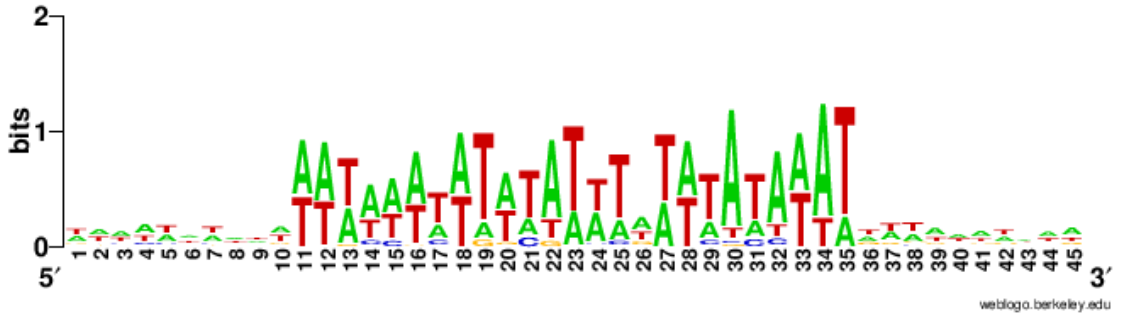

weblogo.berkeley.edu

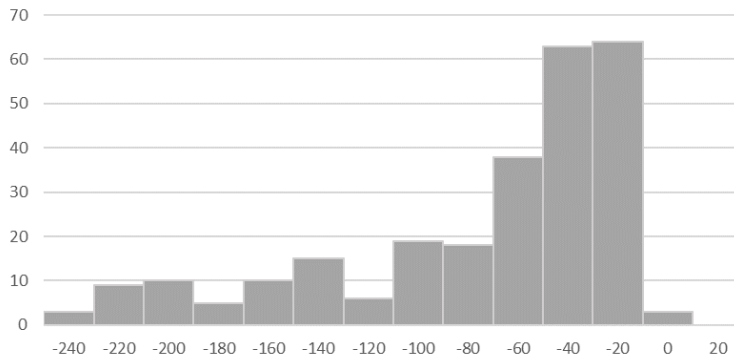

## Motif #4 (107 sites)

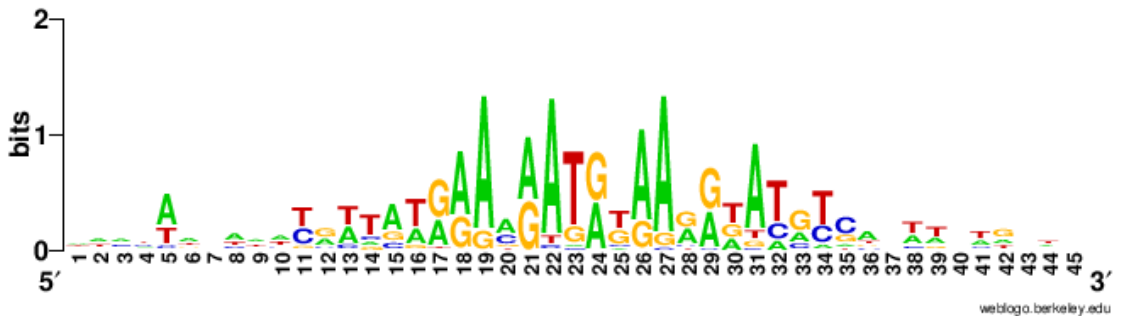

weblogo.berkeley.edu

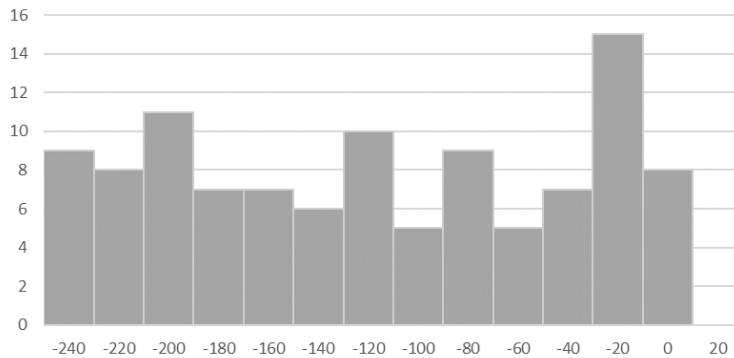

# LCPAC302\_304

949 fragments

## Motif #5 (104 sites)

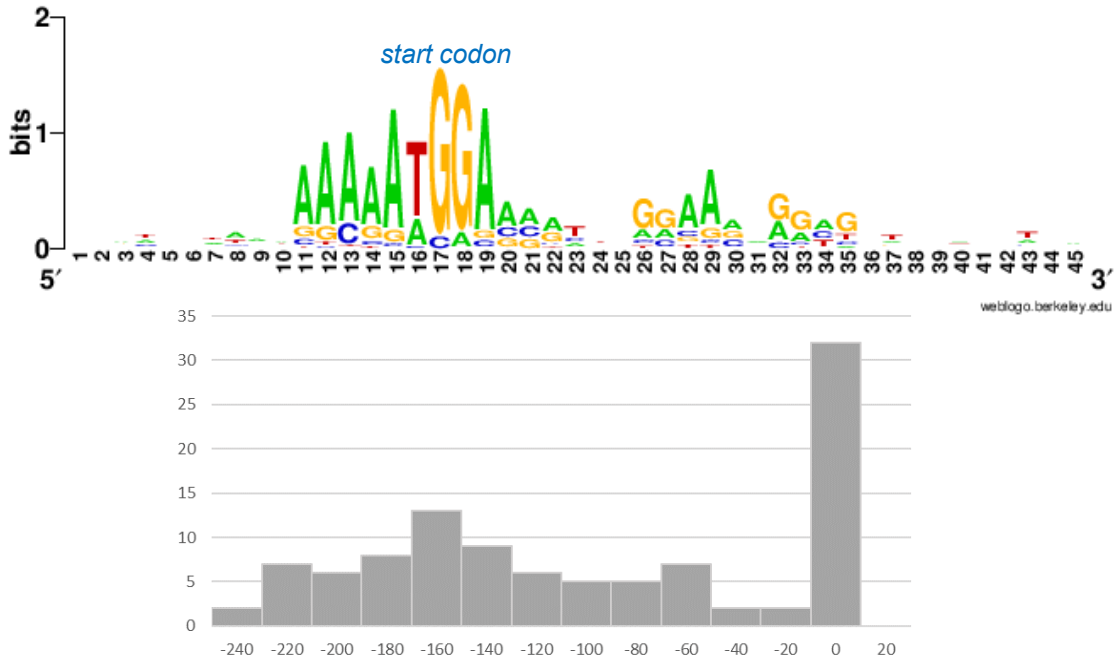

## Motif #6 (100 sites)

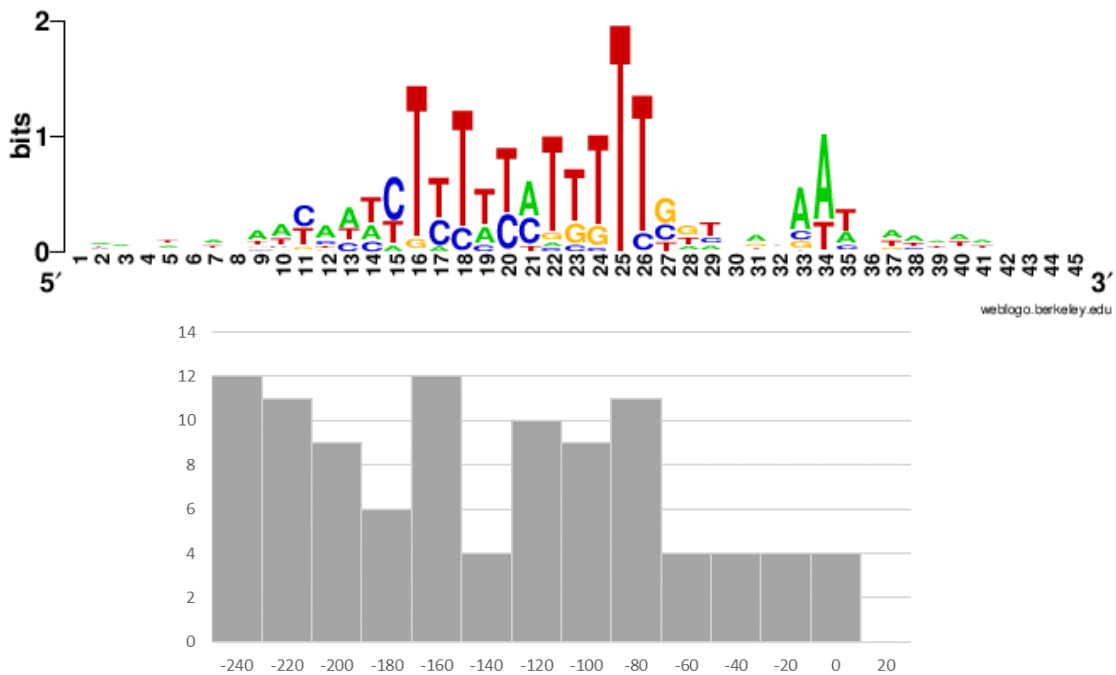

# LCPAC001

220 fragments

## Motif #1 (122 sites)

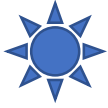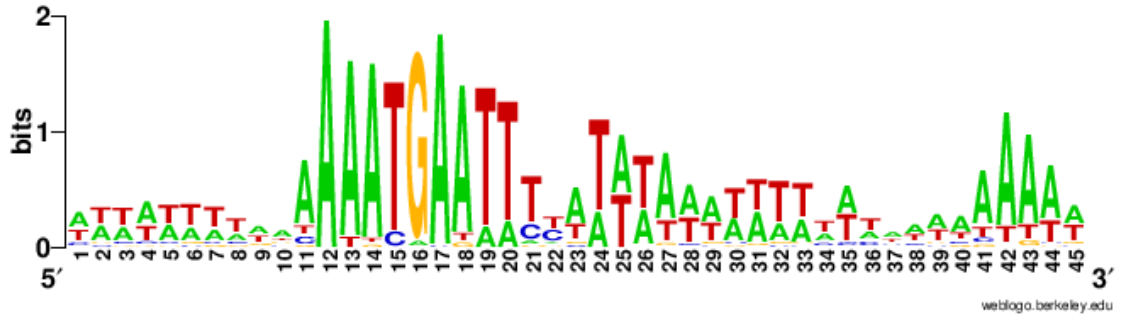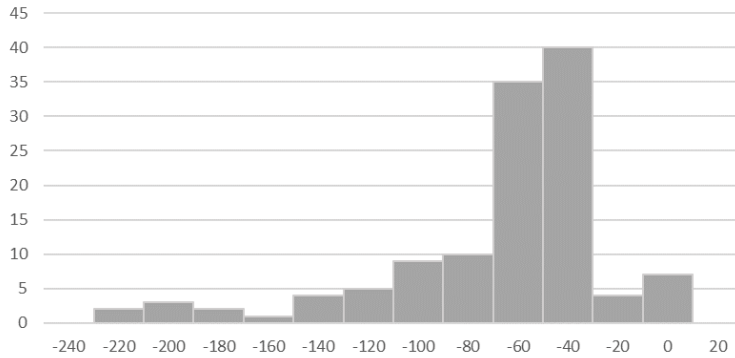

## Motif #2 (61 sites)

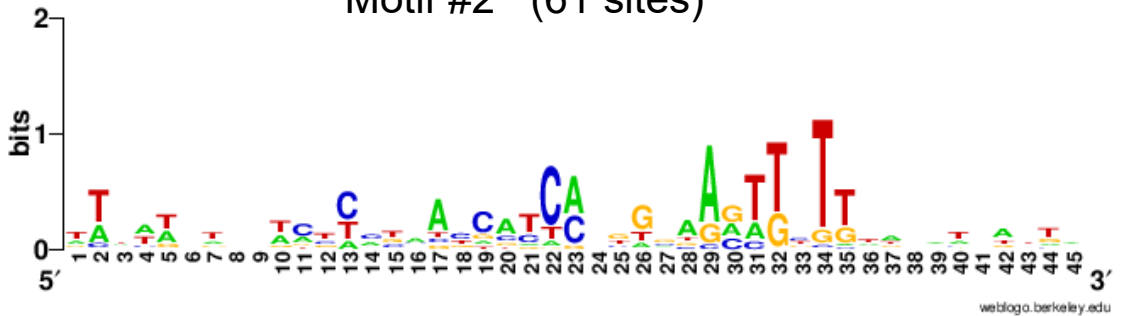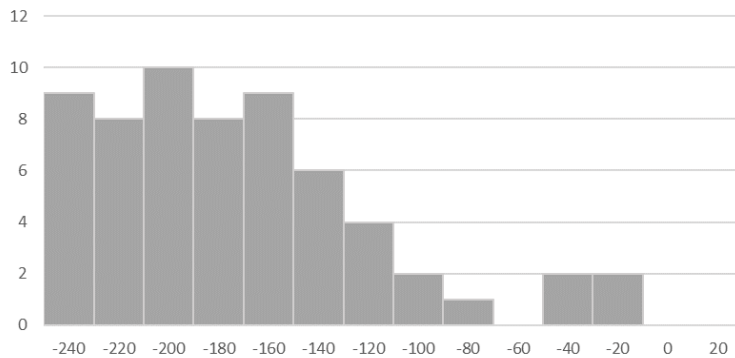

# LCPAC001

220 fragments

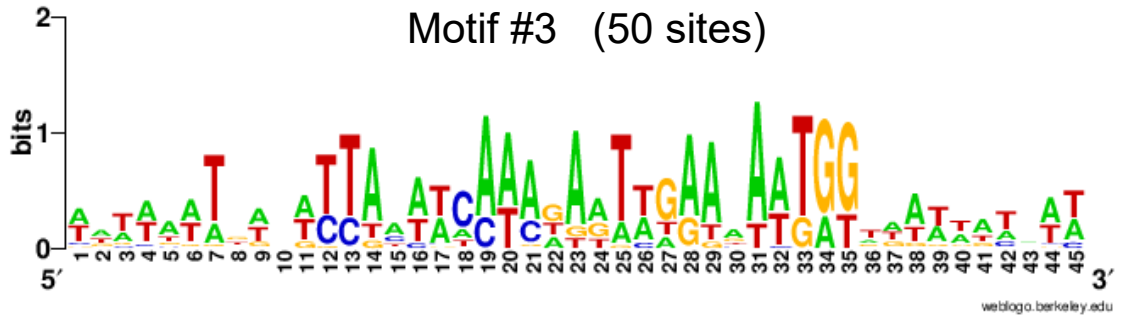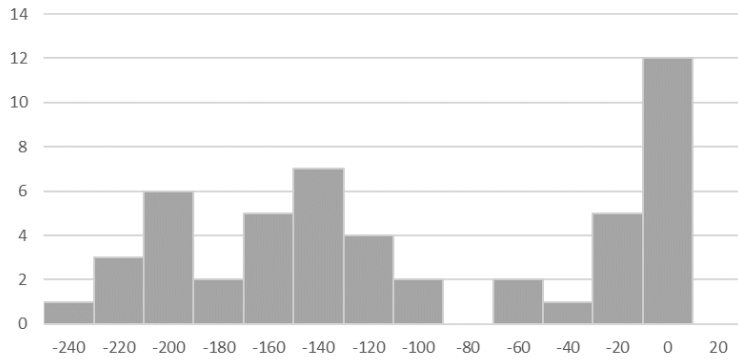

# Motif #4 (64 sites)

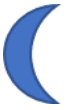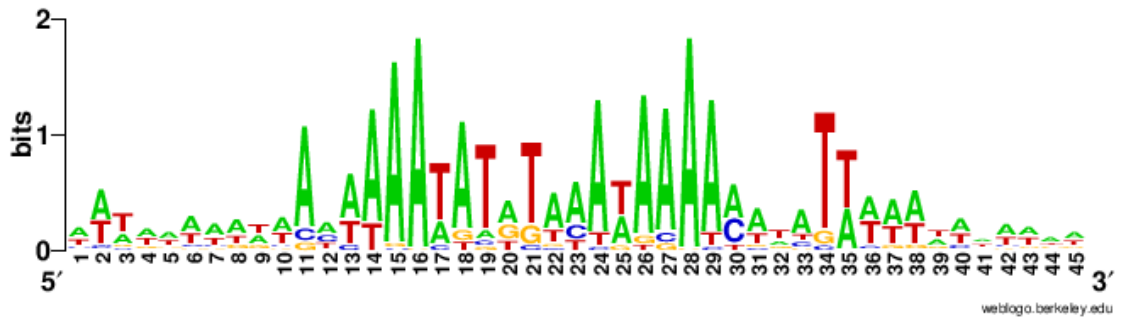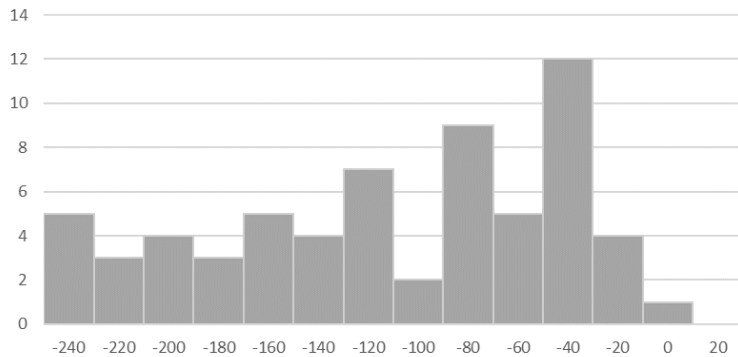

# LCPAC001

220 fragments

## Motif #5 (50 sites)

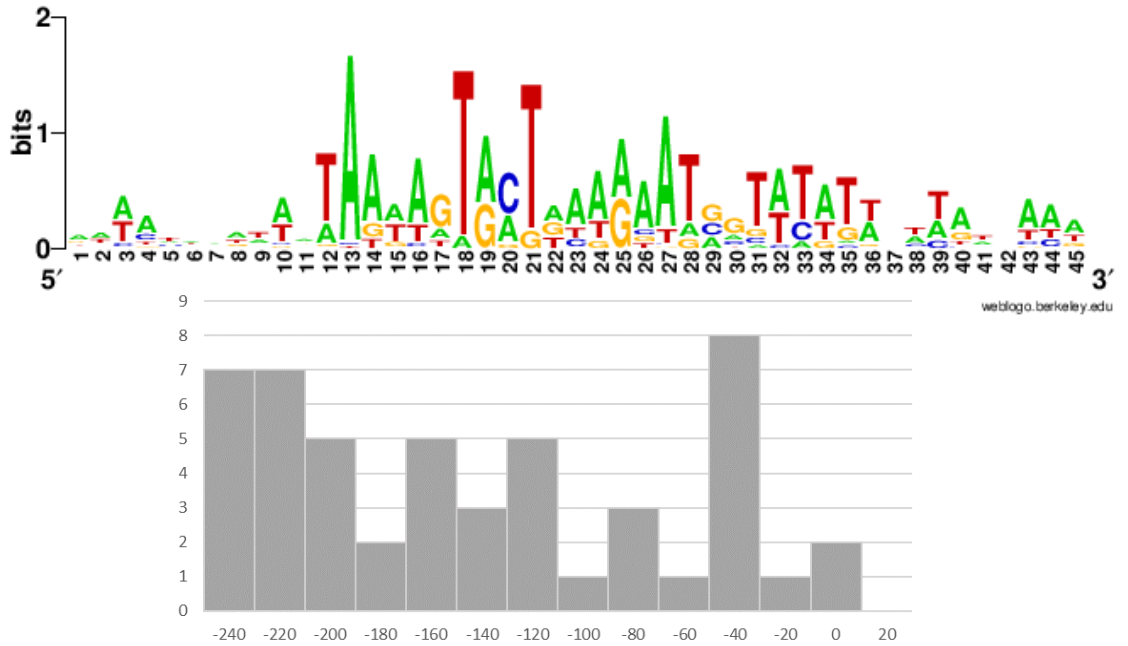

## Motif #7 (58 sites)

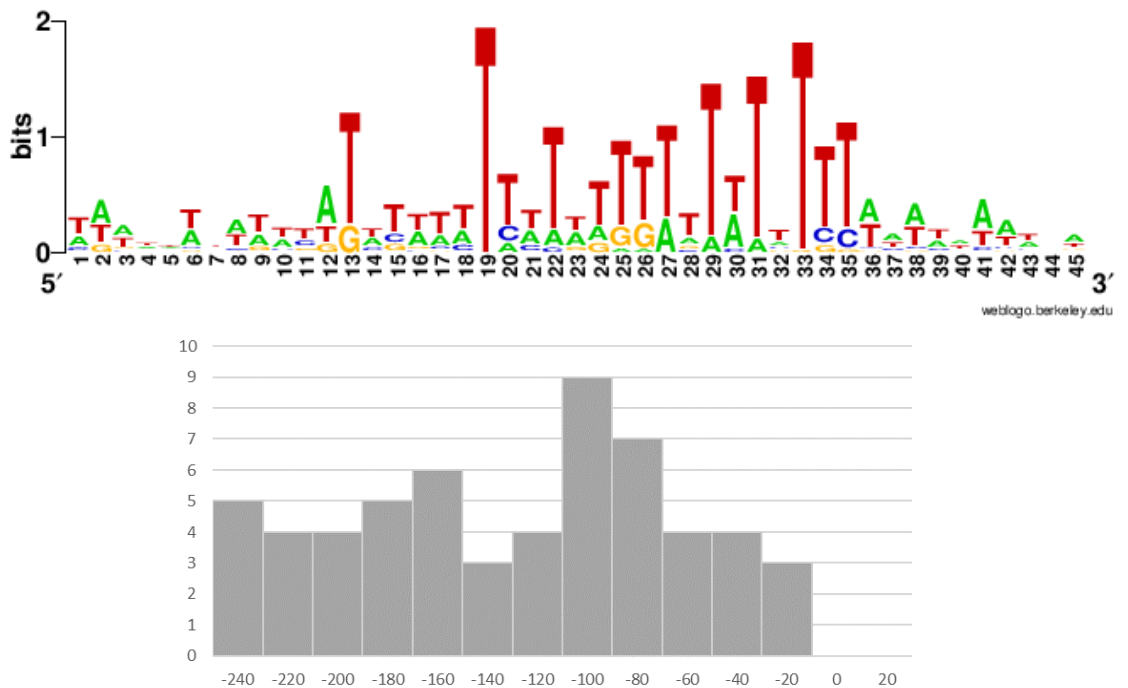

# Pithovirus sibericum

467 fragments

## Motif #1 (99 sites)

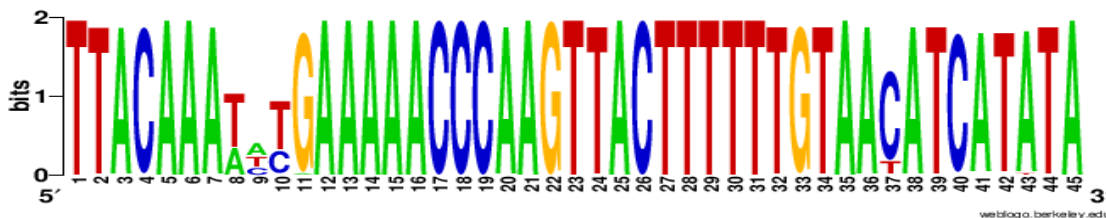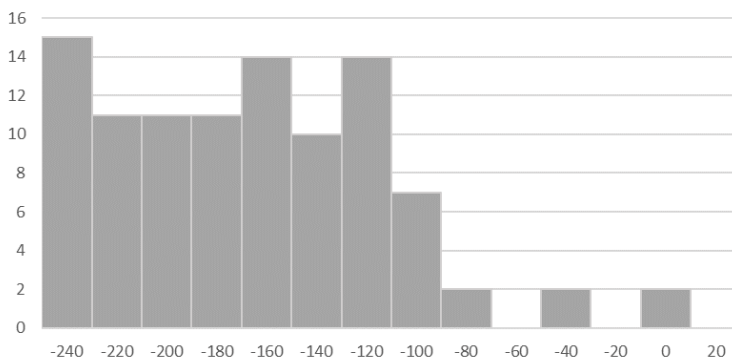

## Motif #2 (99 sites)

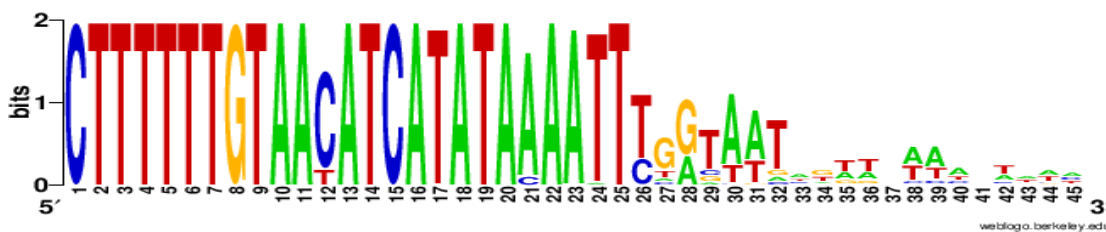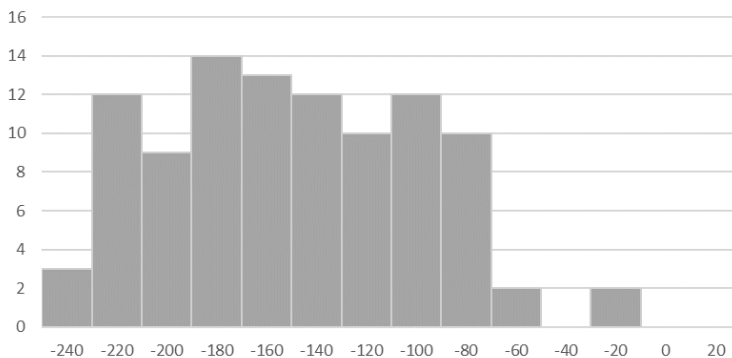

# Pithovirus sibericum

467 fragments

## Motif #3 (60 sites)

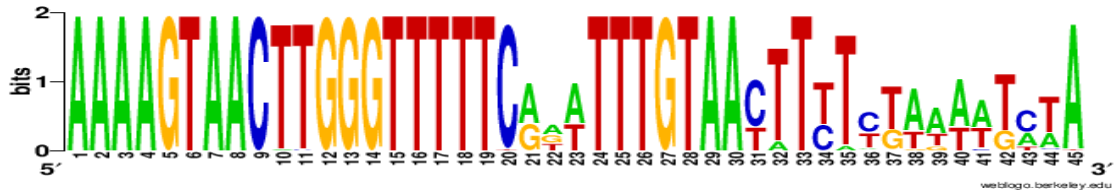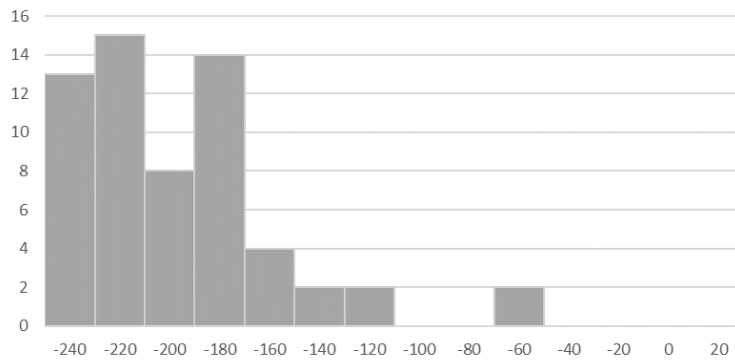

## Motif #4 (72 sites)

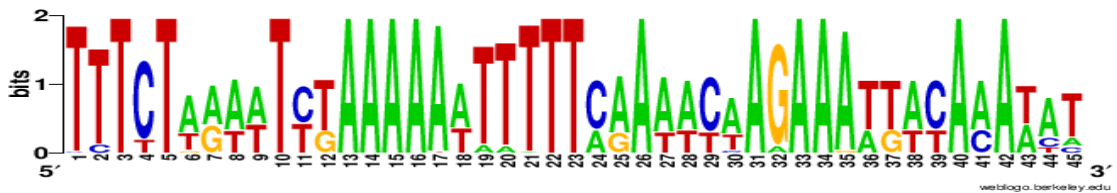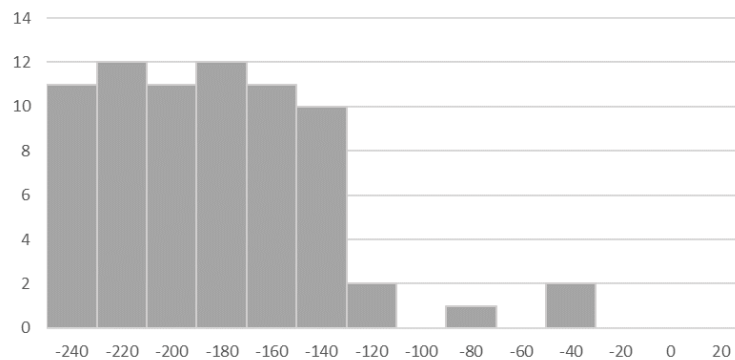

# Pithovirus sibericum

467 fragments

## Motif #5 (50 sites)

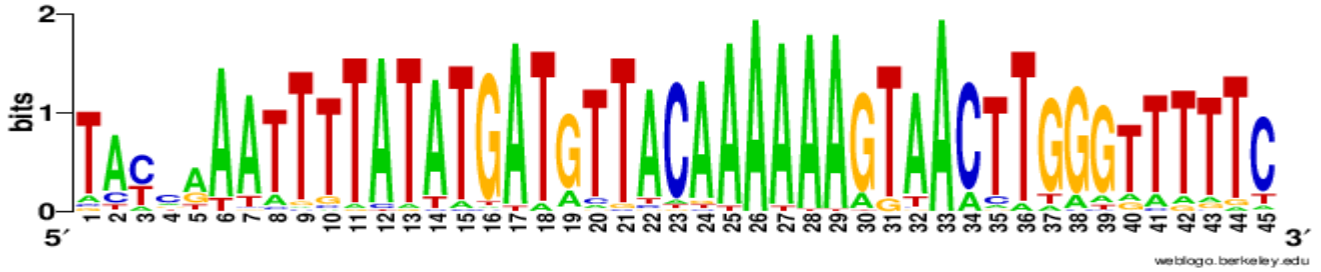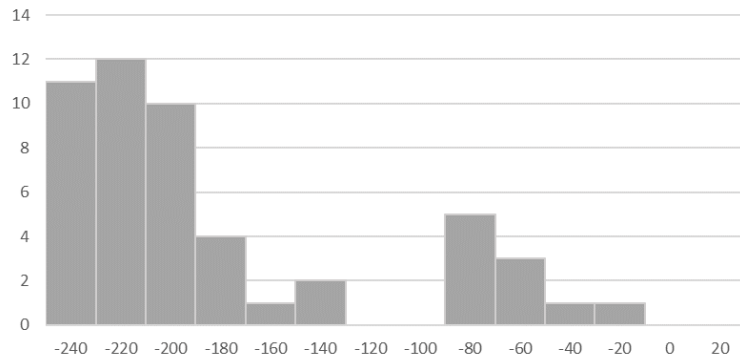

## Motif #6 (443 sites)

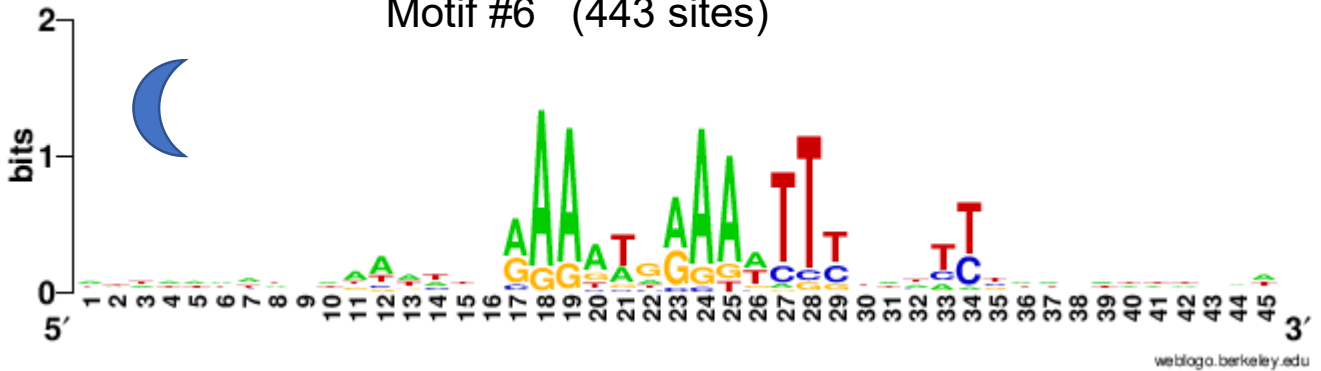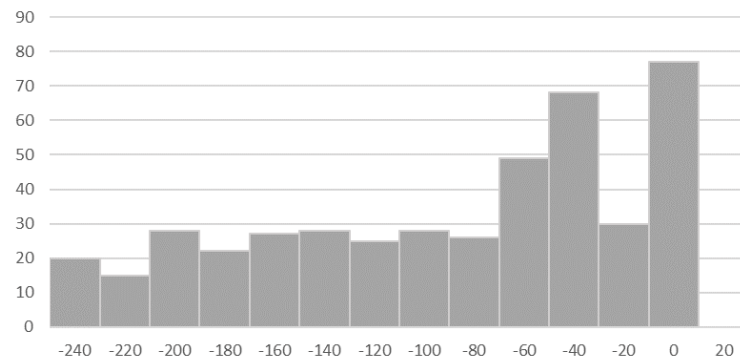



# Pithovirus sibericum

467 fragments

## Motif #7 (50 sites)

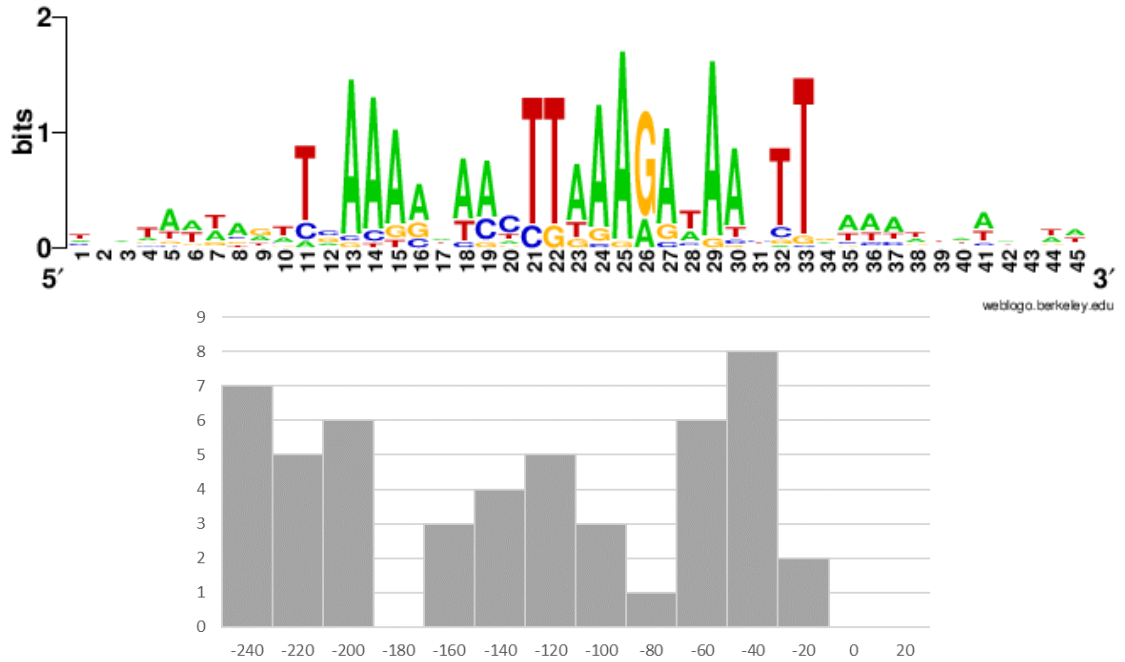

## Motif #8 (113 sites)

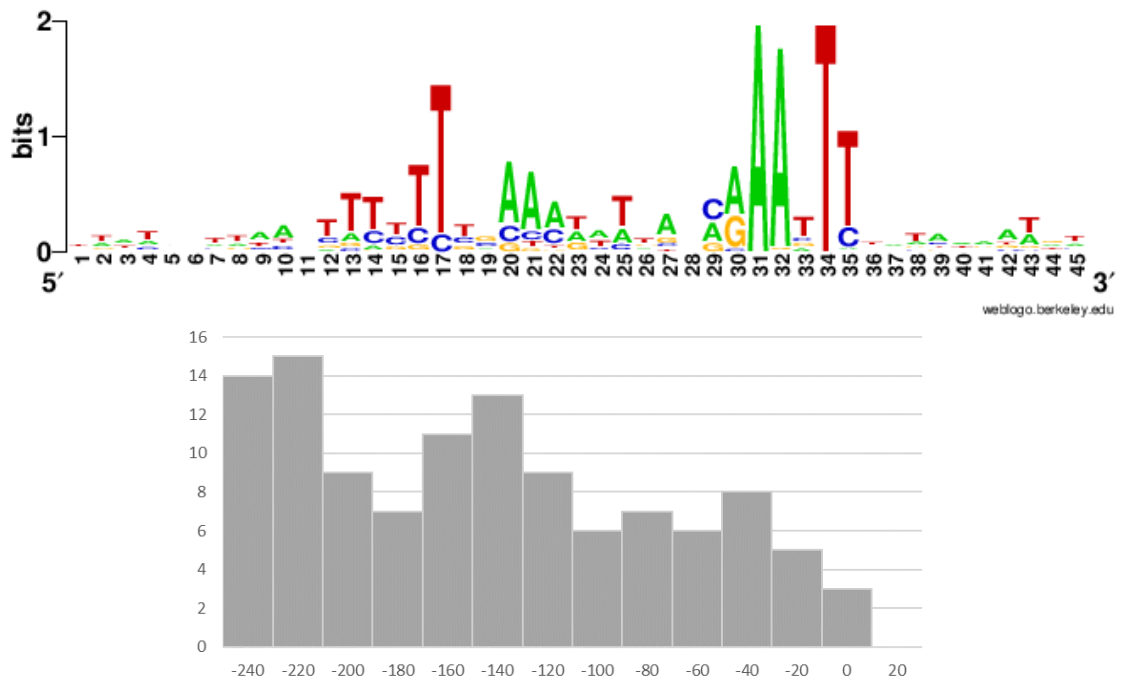

# Pithovirus sibericum

467 fragments

## Motif #9 (68 sites)

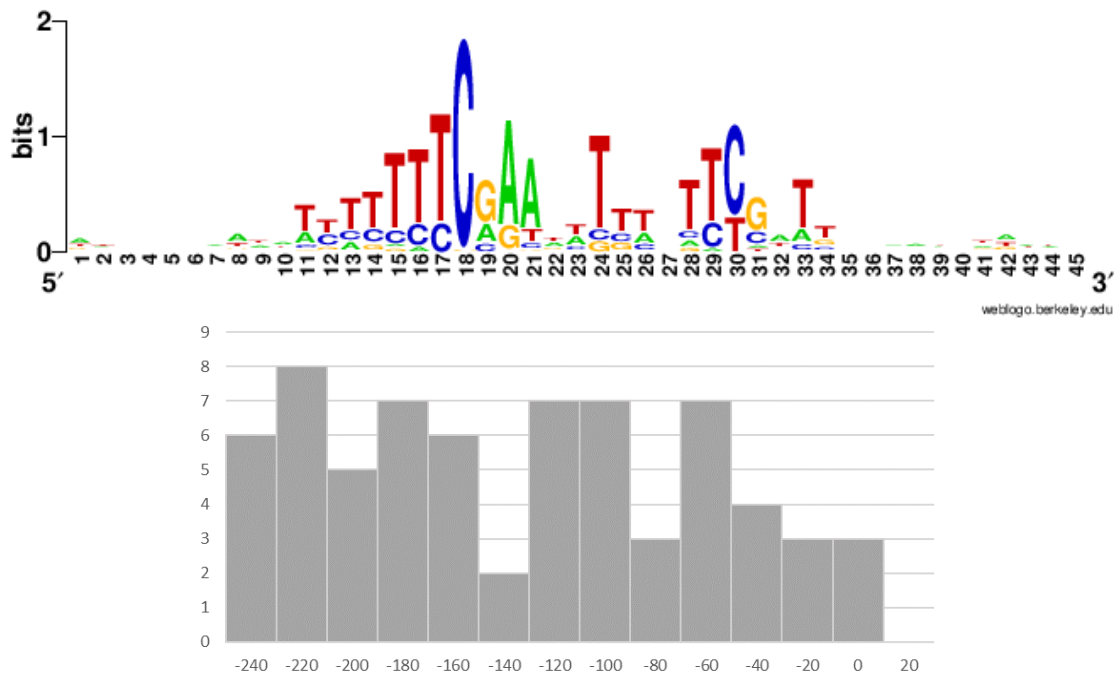

## Motif #10 (78 sites)

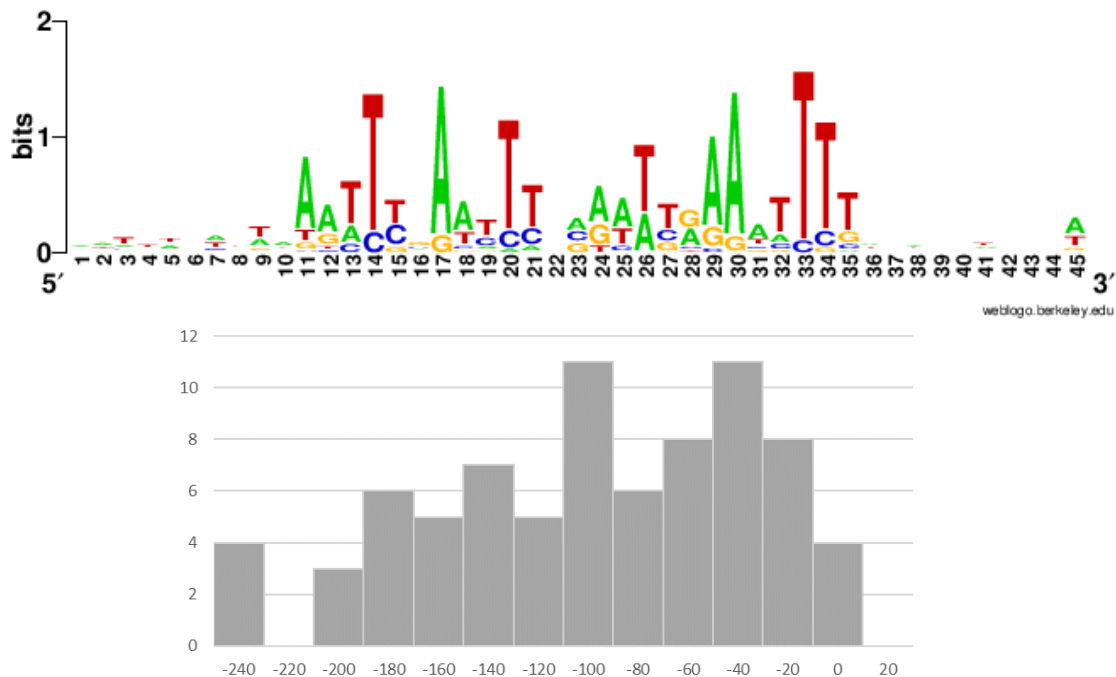

# Cedratvirus A11

574 fragments

## Motif #1 (50 sites)

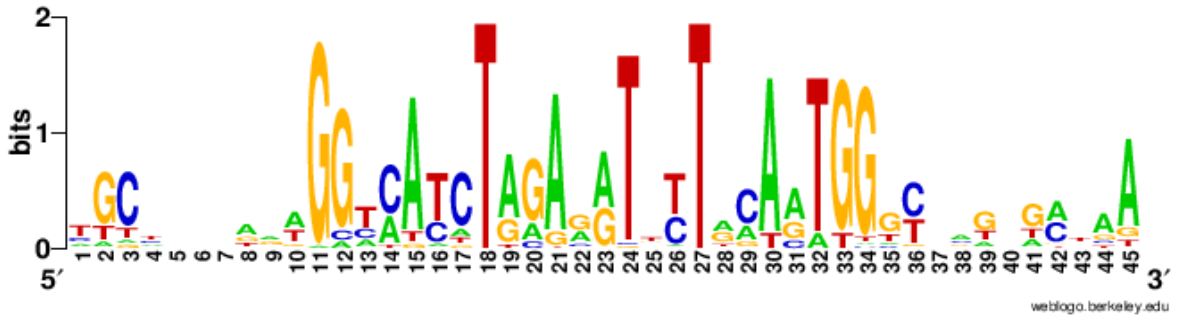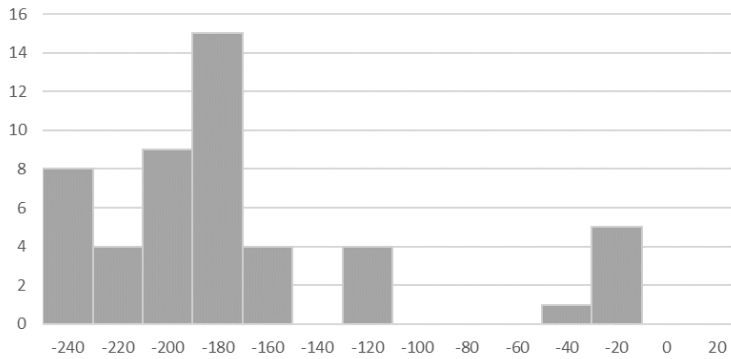

## Motif #2 (50 sites)

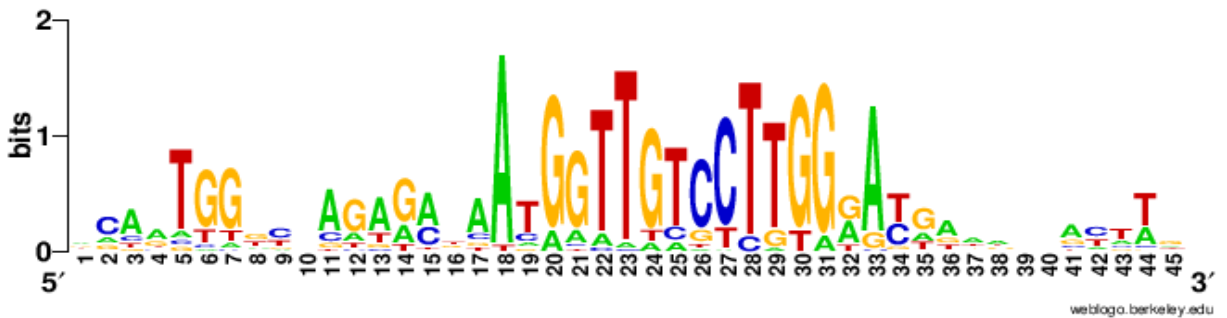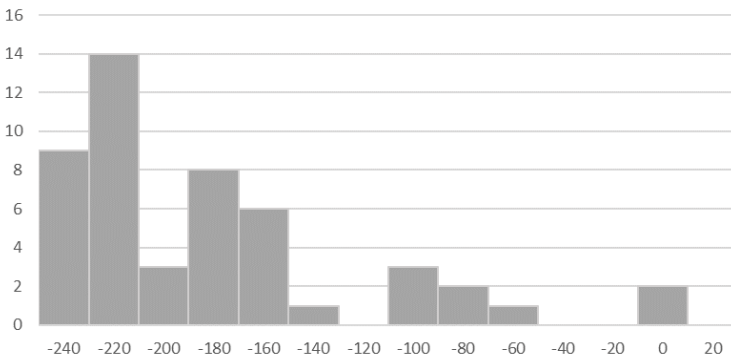

# Cedratvirus A11

574 fragments

## Motif #3 (42 sites)

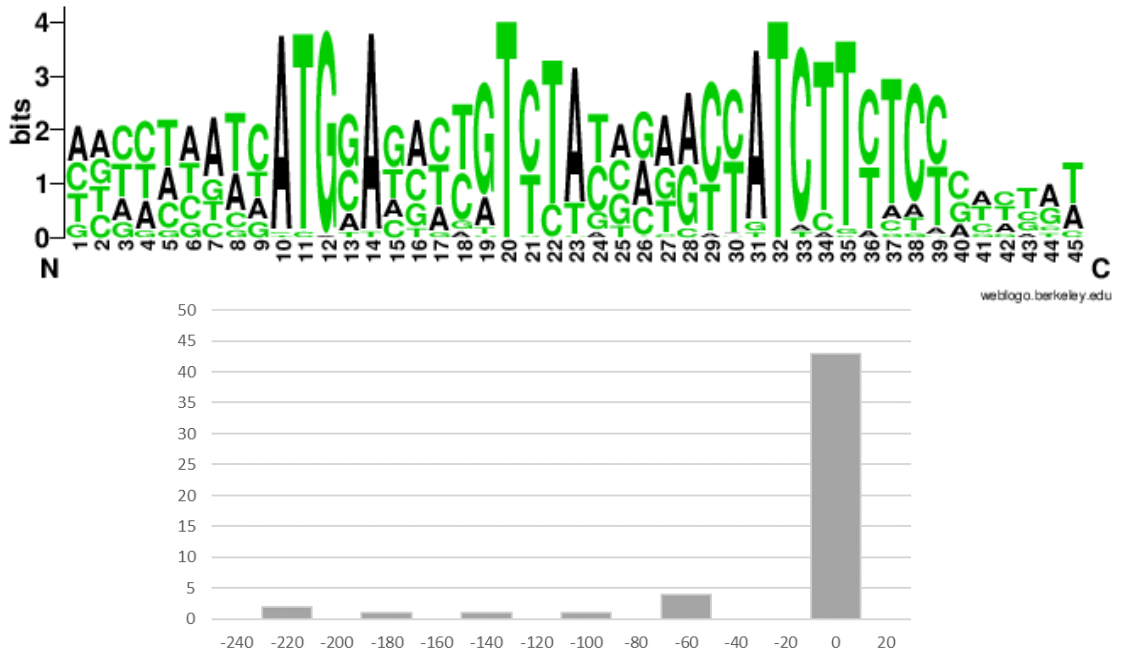

## Motif #4 (148 sites)

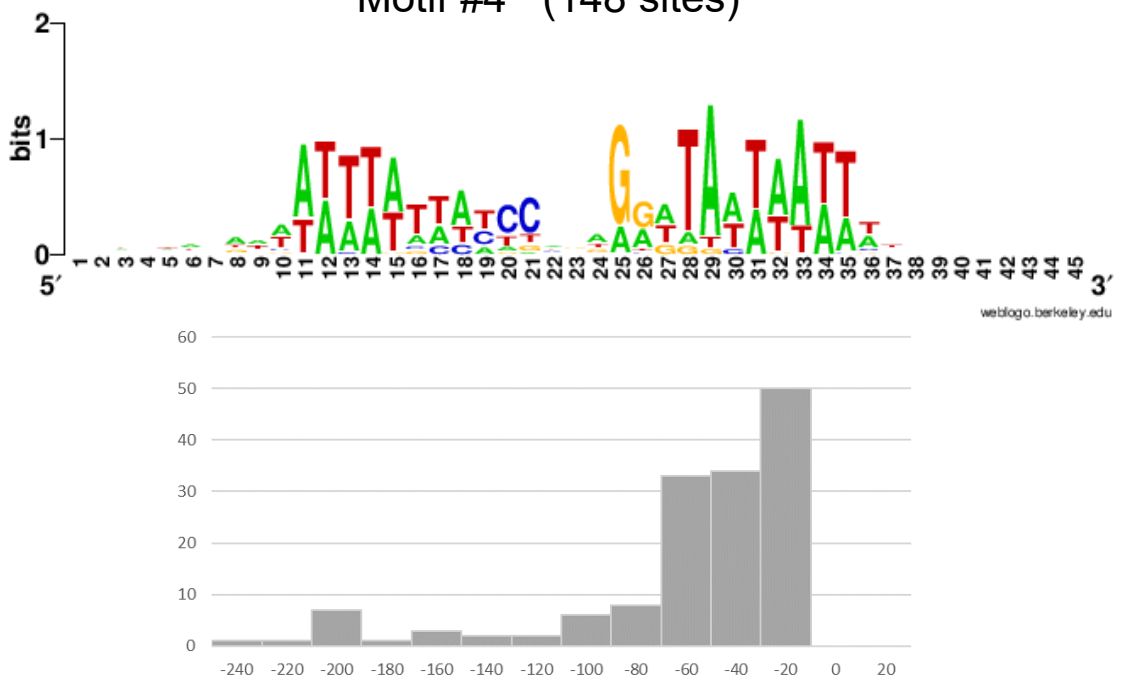

# Cedratvirus A11

574 fragments

## Motif #5 (270 sites)

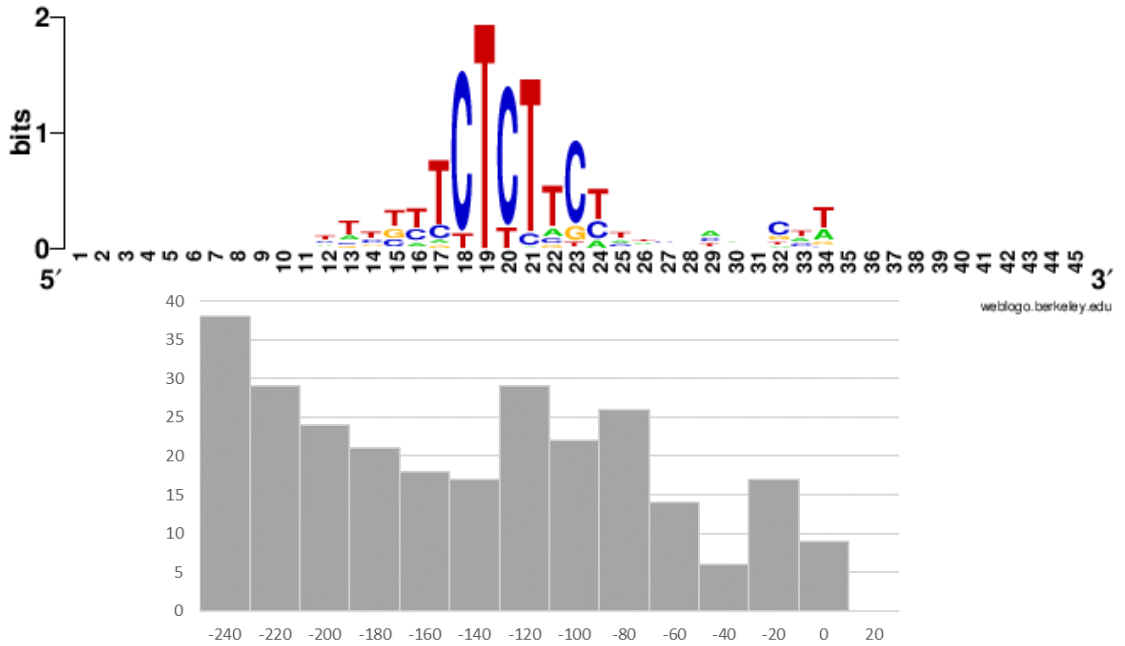

## Motif #6 (163 sites)

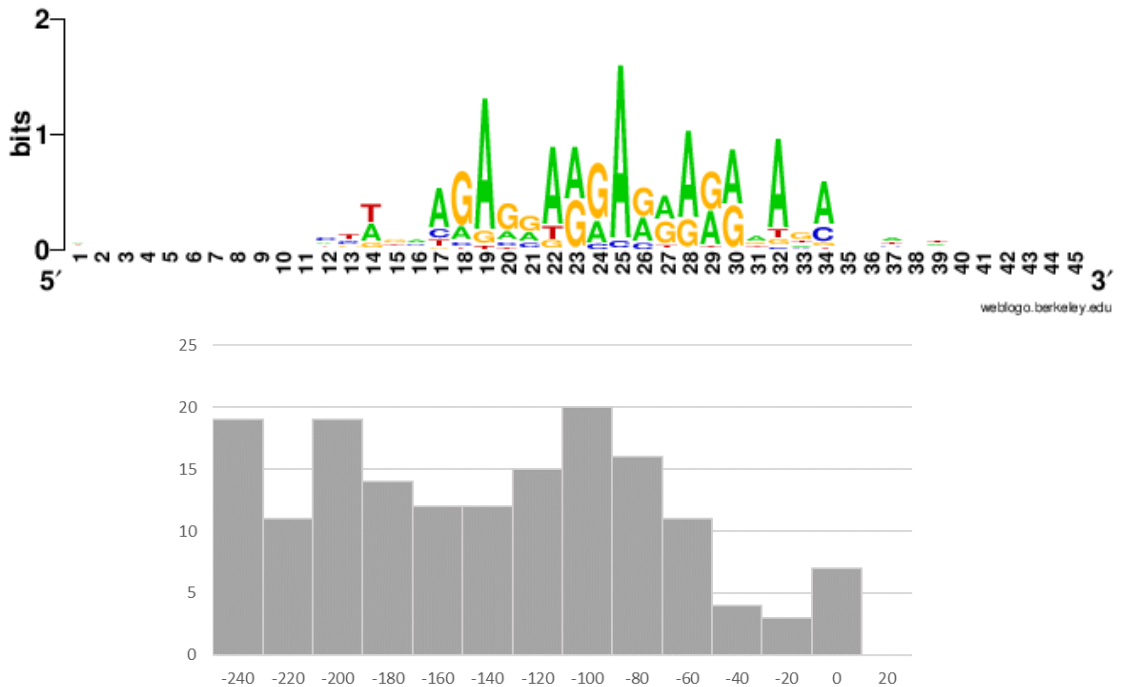

# Cedratvirus A11

574 fragments

## Motif #7 (52 sites)

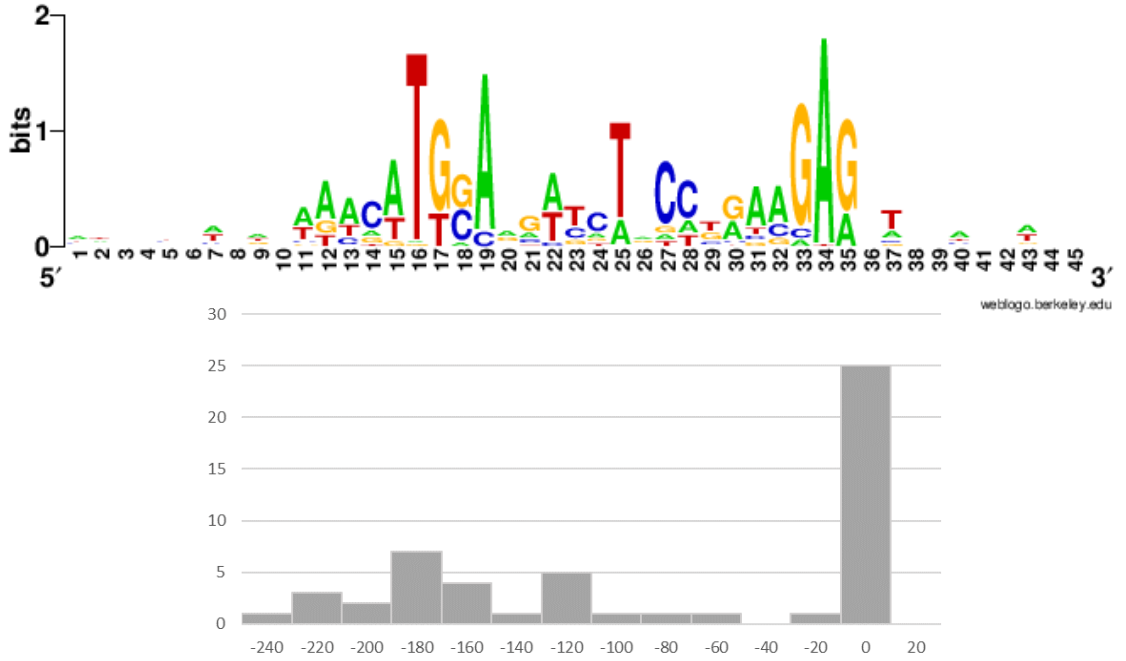

## Motif #8 (52 sites)

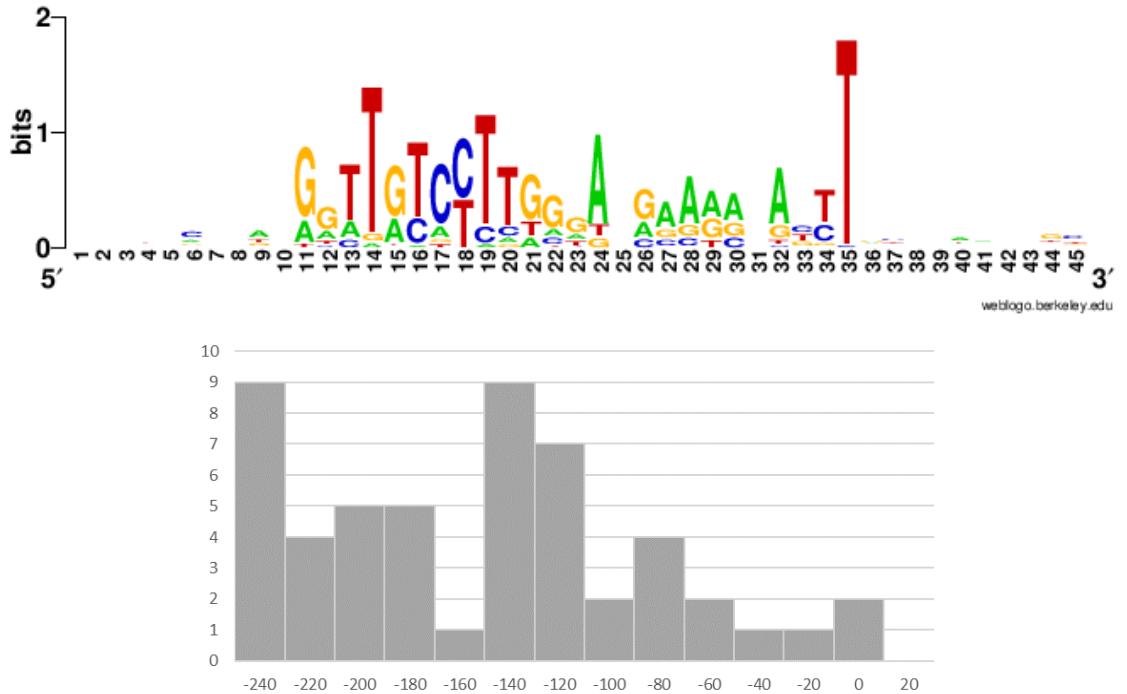

# Cedratvirus A11

574 fragments

## Motif #9 (82 sites)

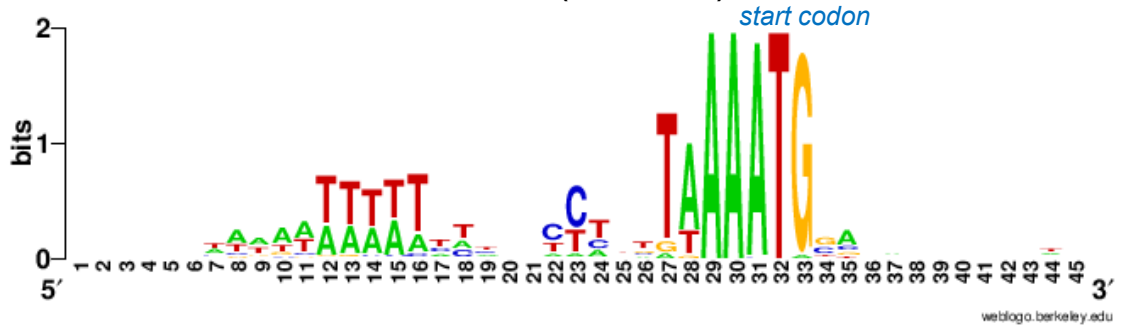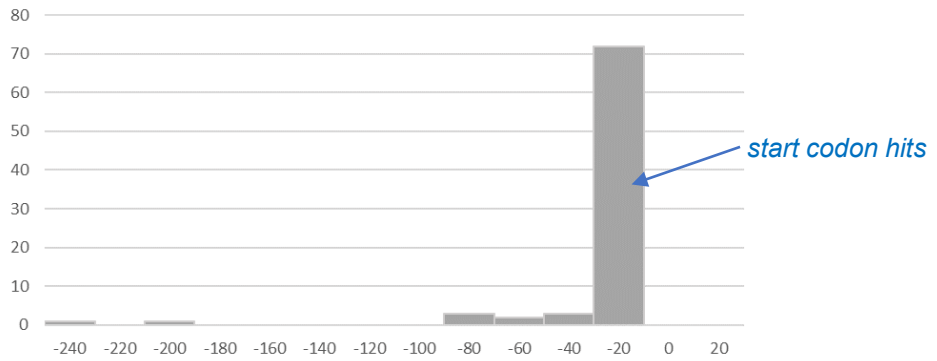

## Motif #10 (50 sites)

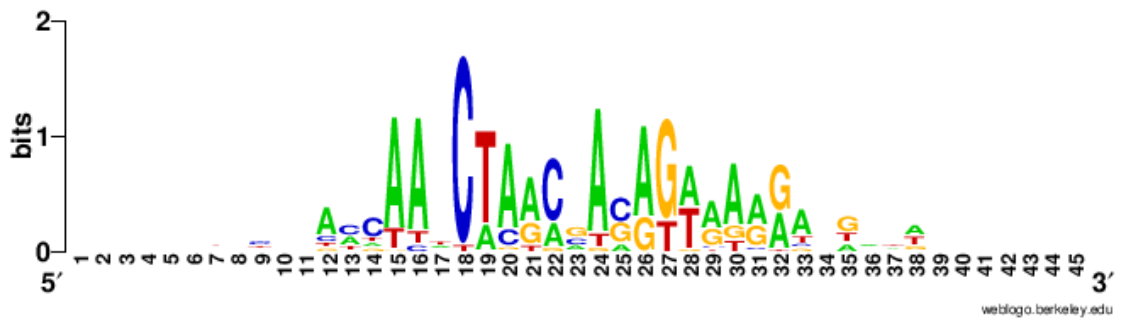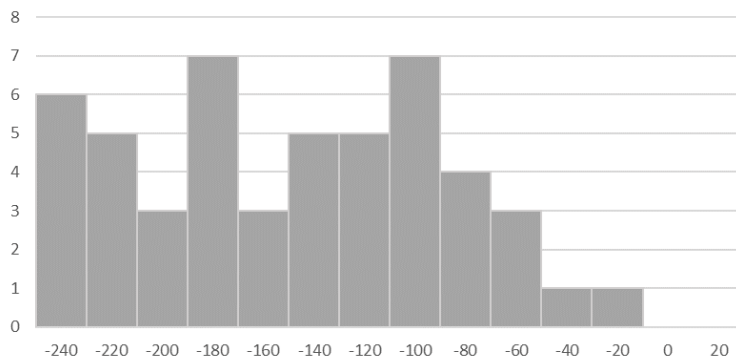

# Pithovirus and Cedratvirus

1041 fragments

## Motif #6 (254 sites)

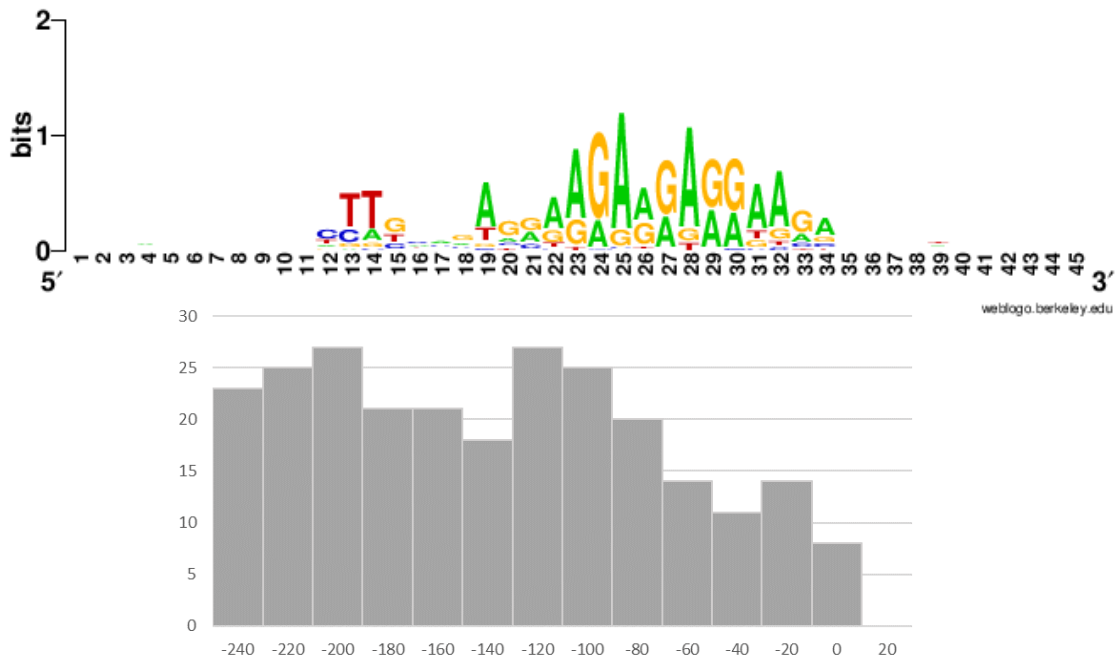

## Motif #7 (255 sites)

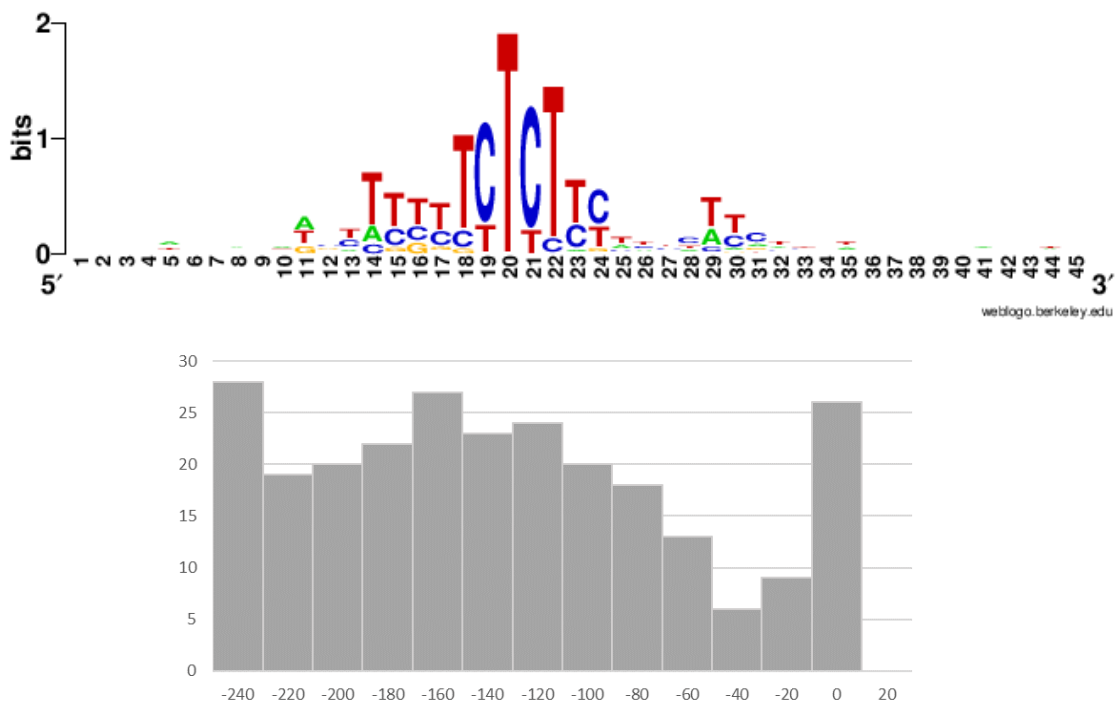



# Pithovirus and Cedratvirus

1041 fragments

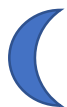

## Motif #13 (128 sites)

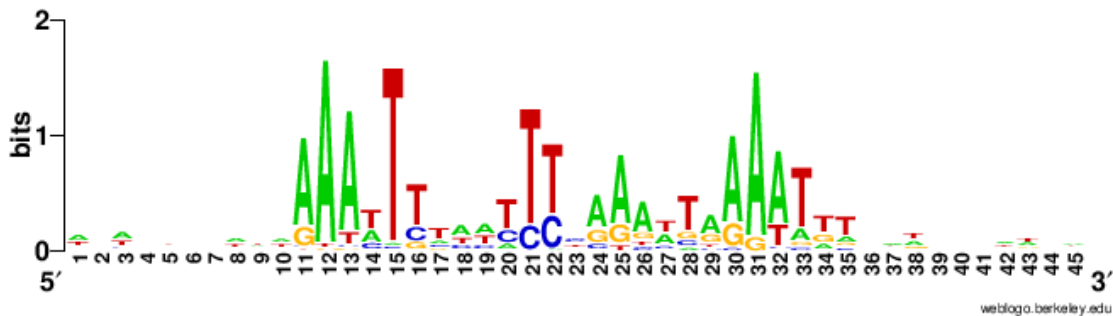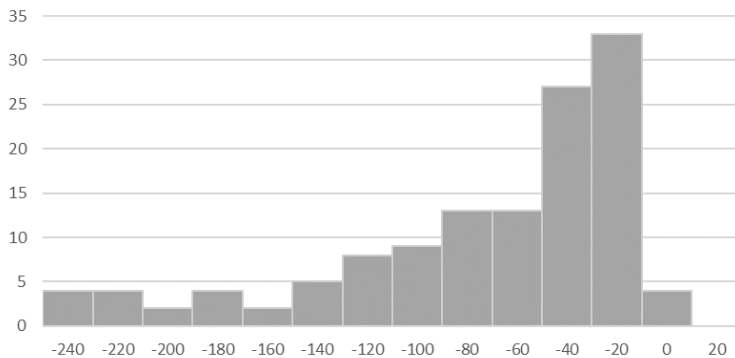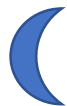

## Motif #15 (122 sites)

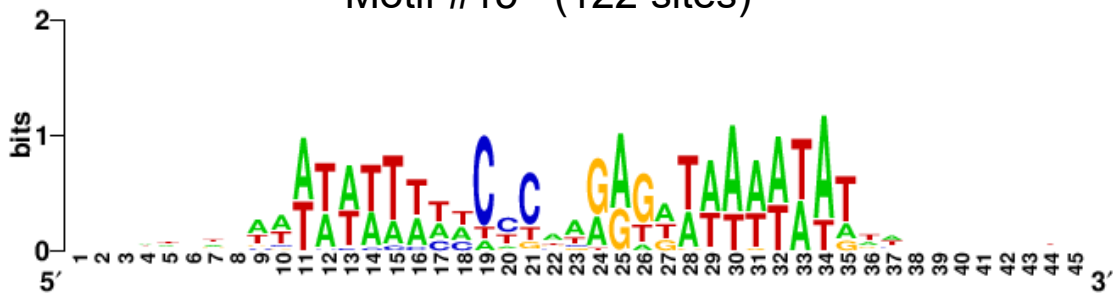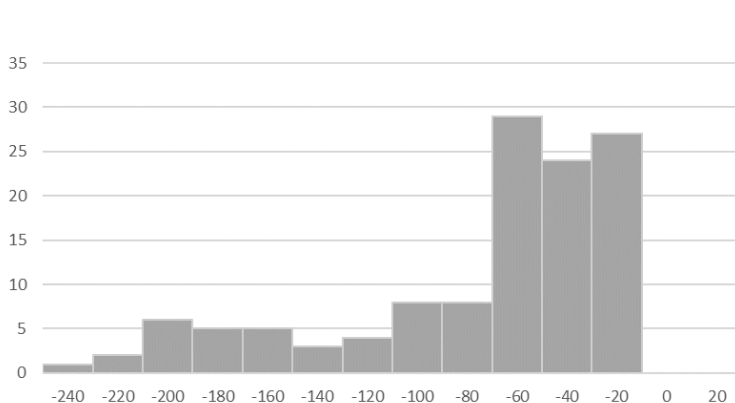





# Orpheovirus

1199 fragments

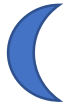

## Motif #5 (264 sites)

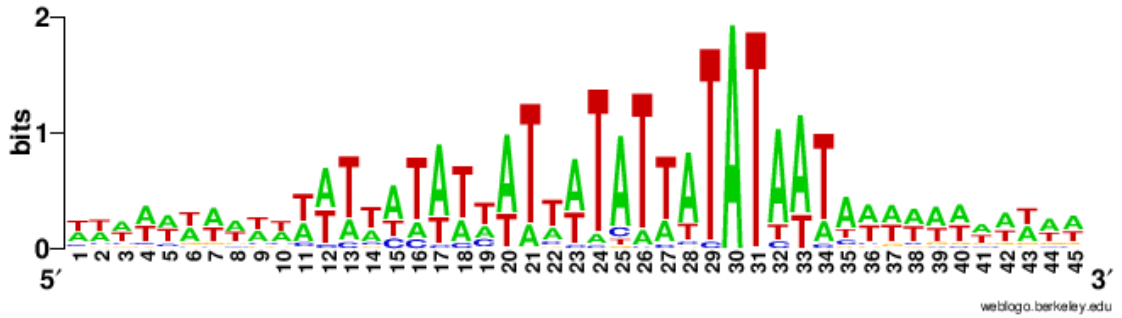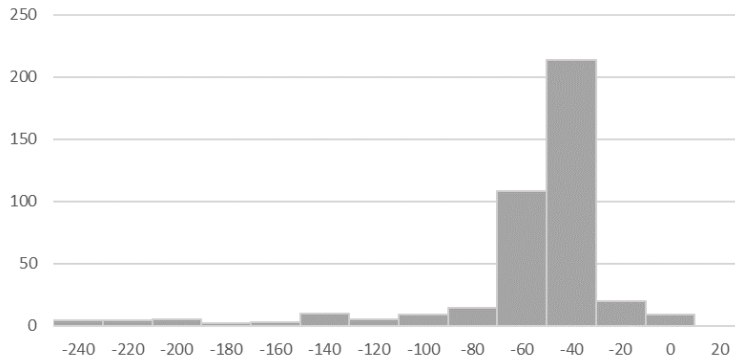

## Motif #6 (150 sites)

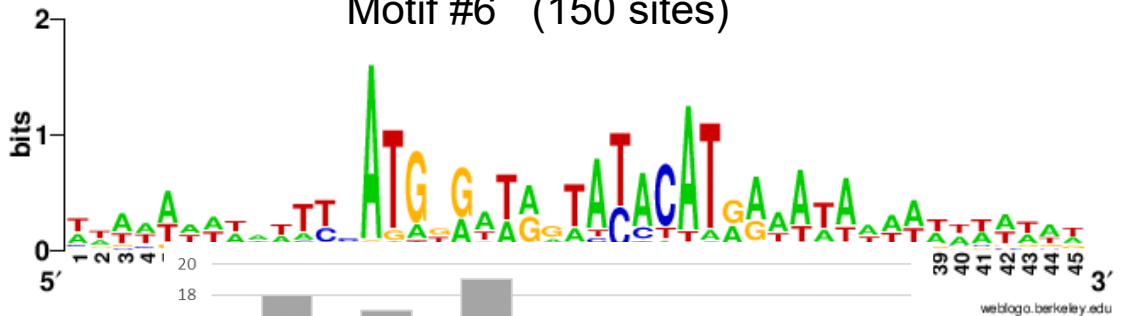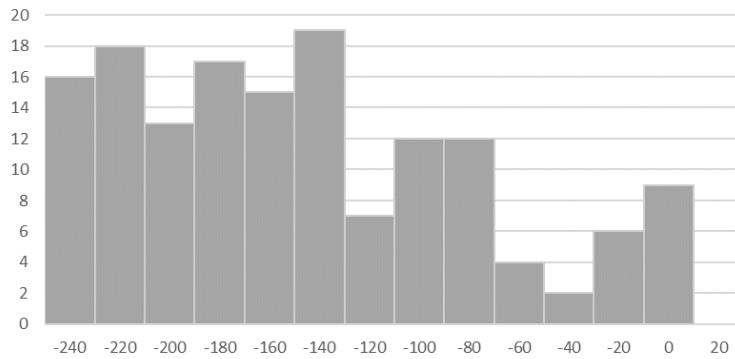

# LCPAC401\_403\_404\_406

1708 fragments

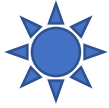

## Motif #1 (888 sites)

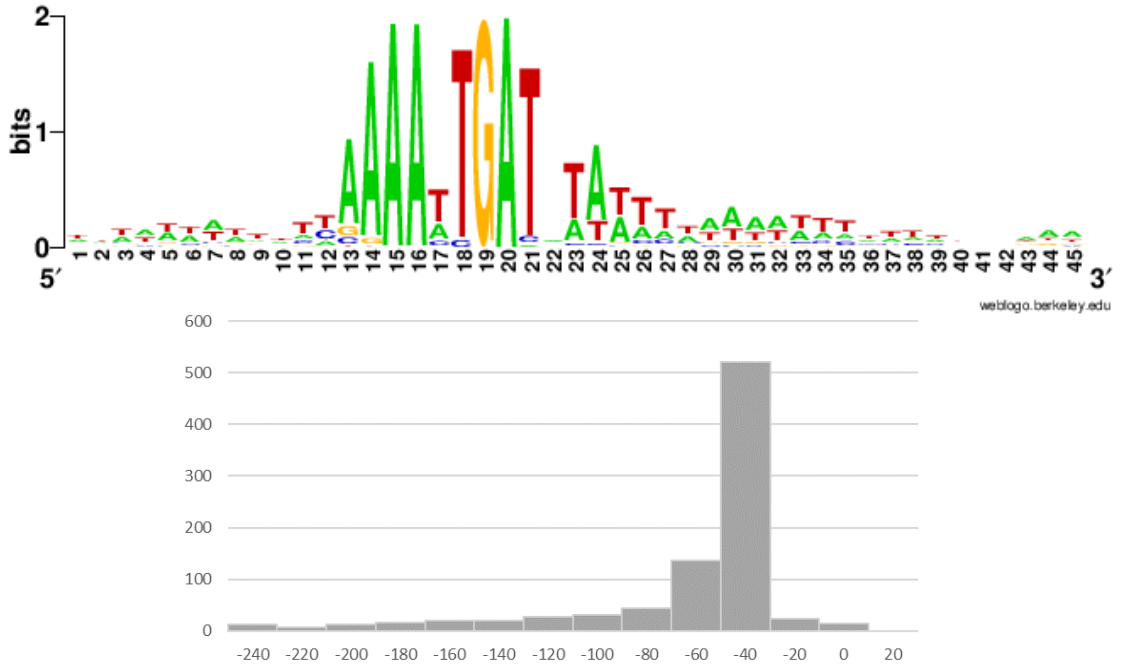

## Motif #2 (170 sites)

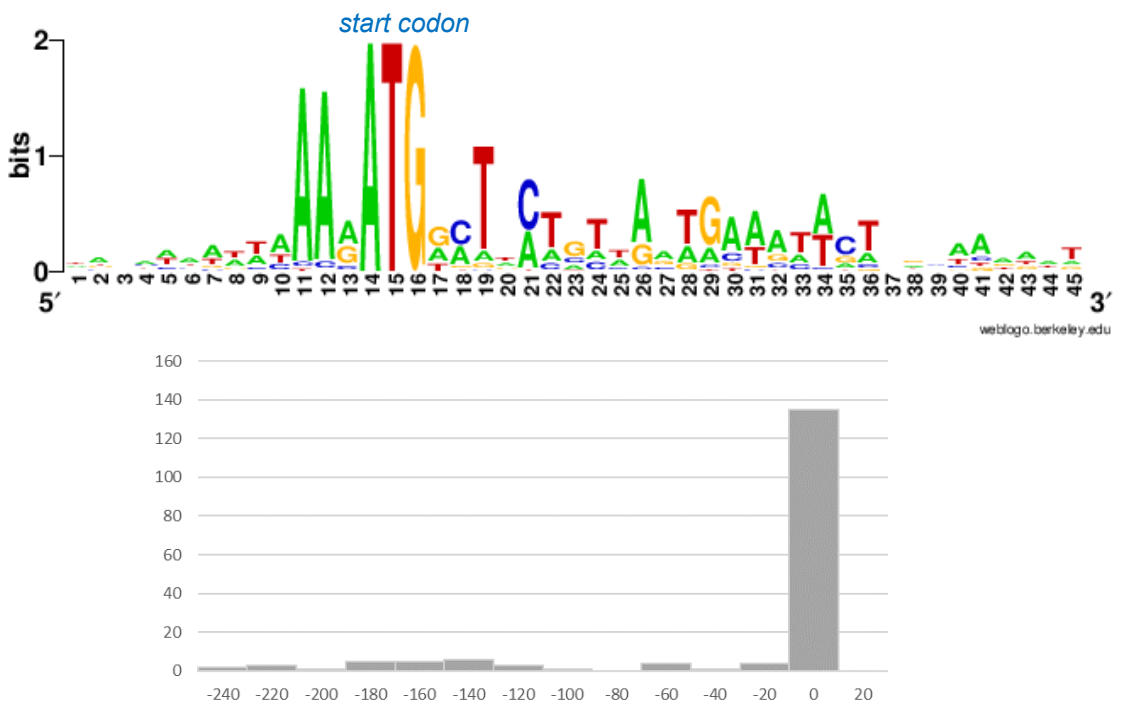

# LCPAC401\_403\_404\_406

1708 fragments

## Motif #3 (170 sites)

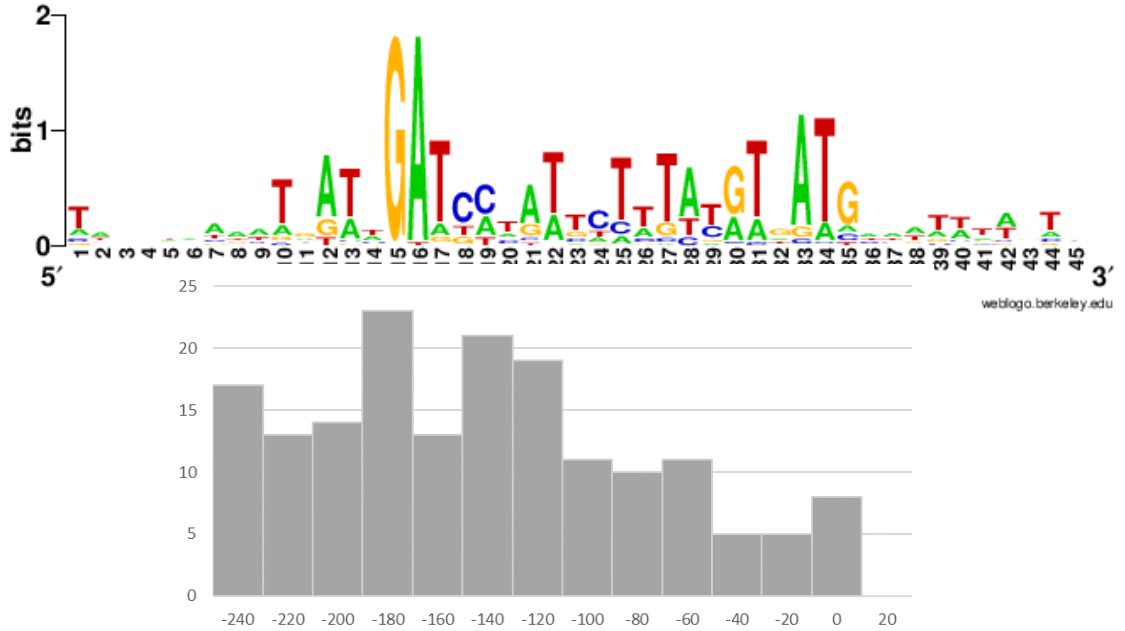

## Motif #4 (258 sites)

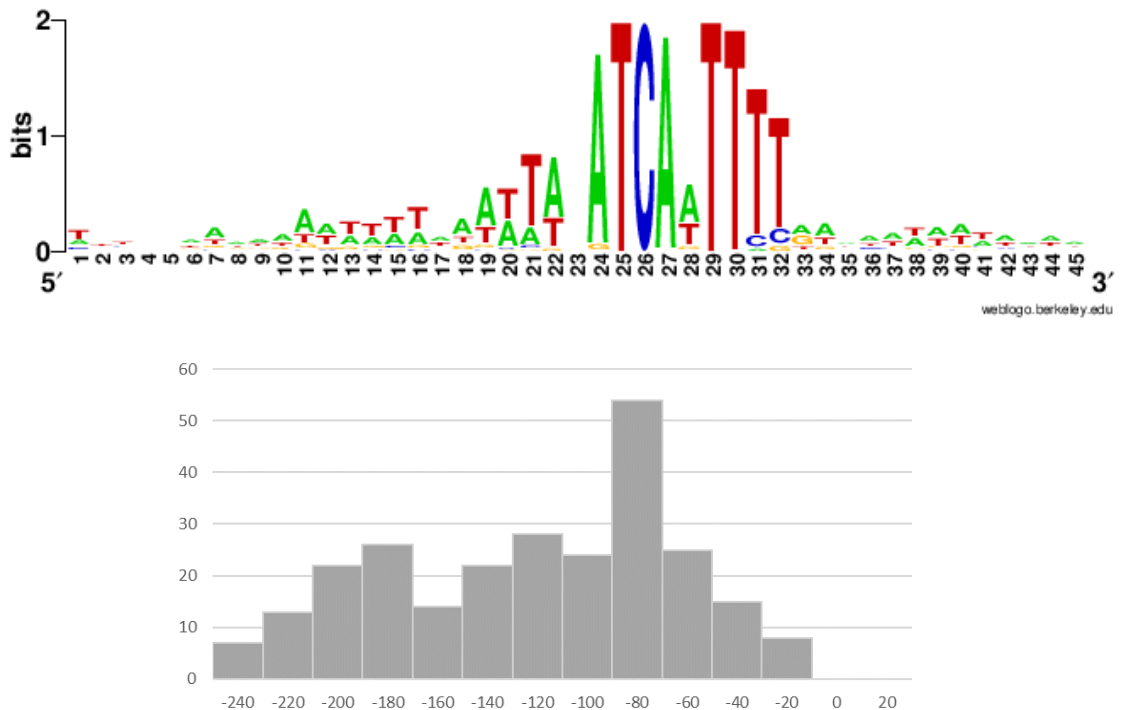



# LCDPAC01

269 fragments

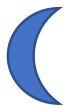

## Motif #1 (72 sites)

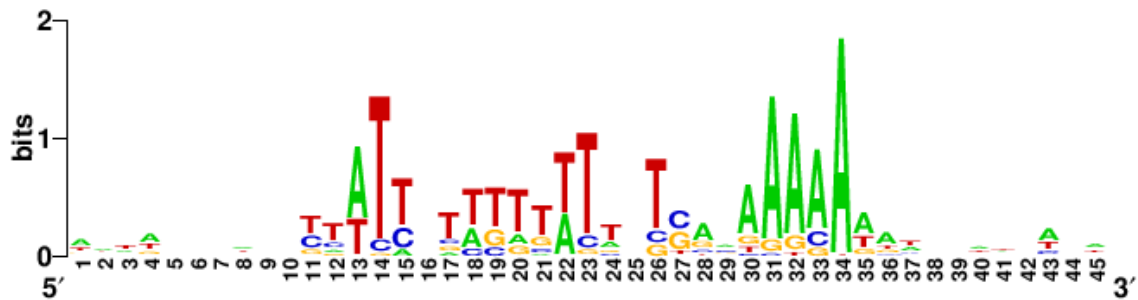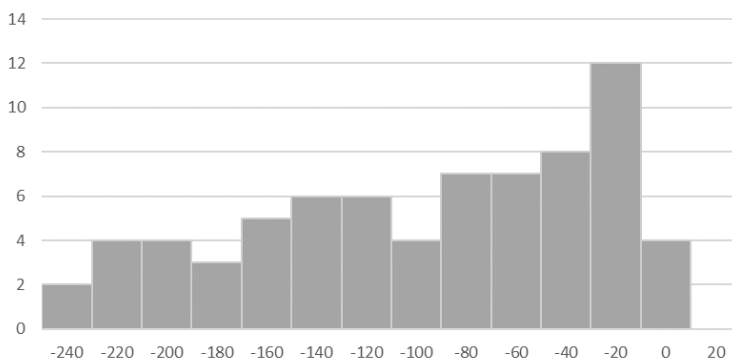

## Motif #2 (57 sites)

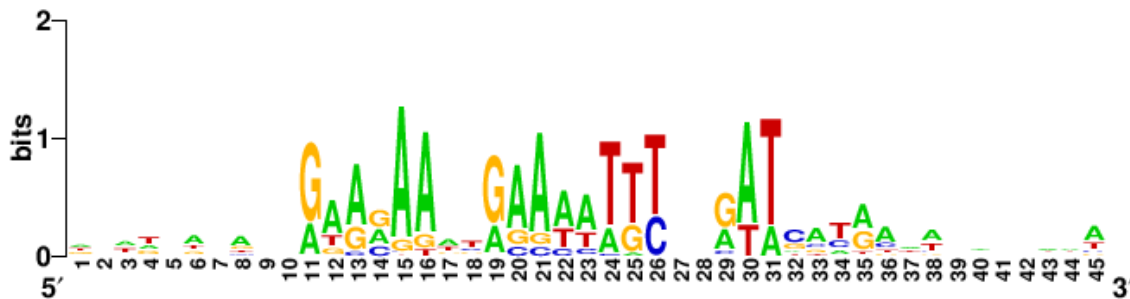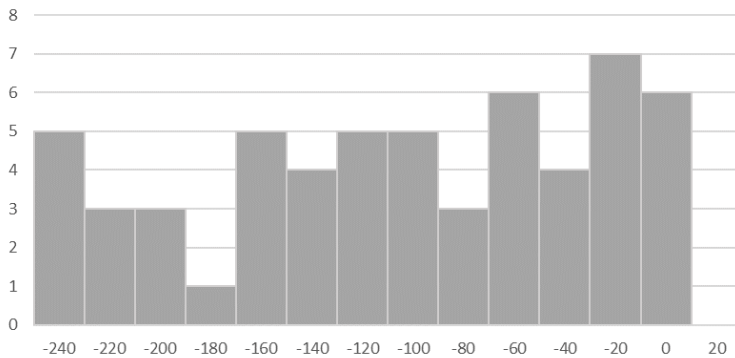



# LCDPAC01

269 fragments

## Motif #3 (50 sites)

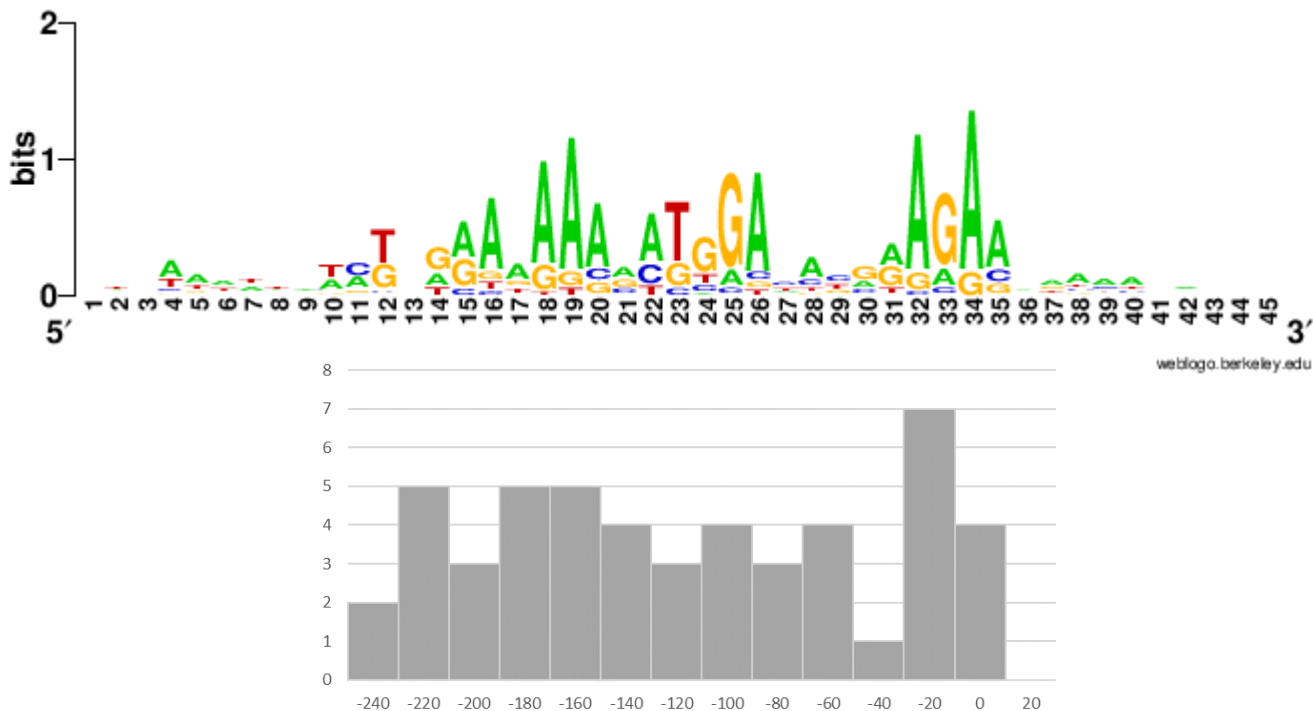

## Motif #5 (67 sites)

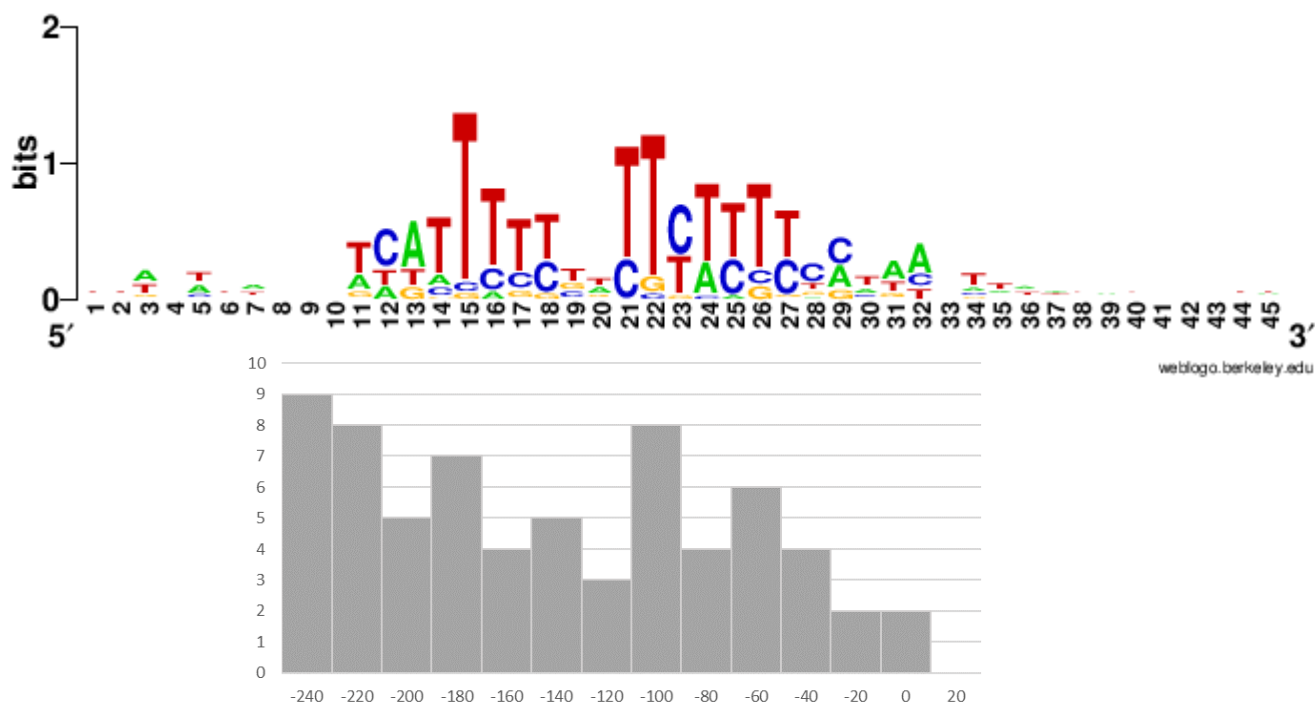

# LCDPAC02

386 fragments

## Motif #1 (266 sites)

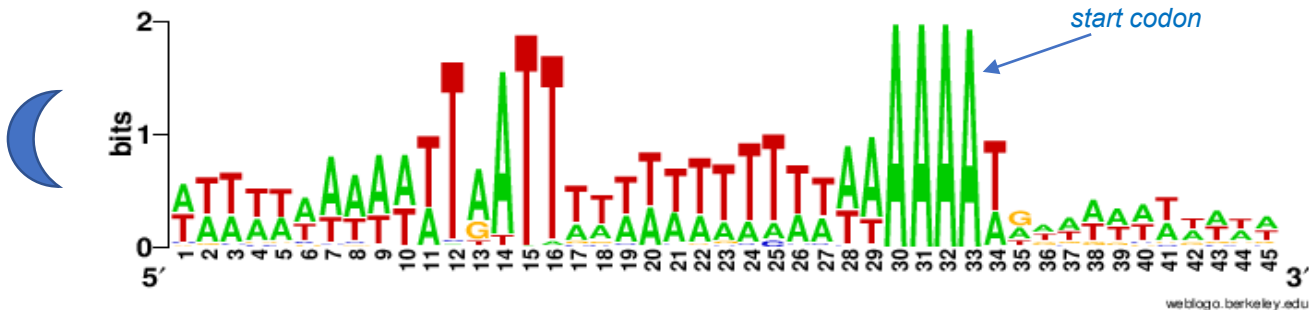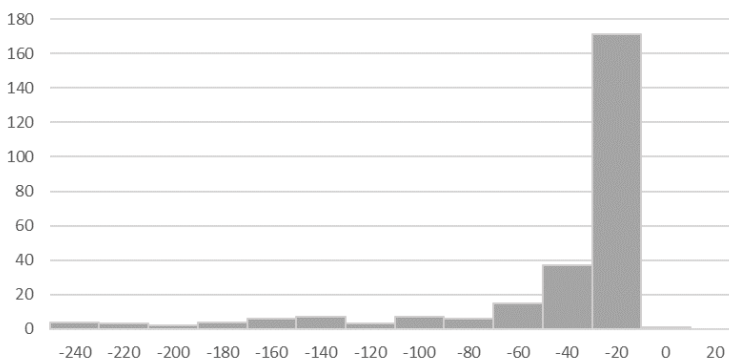

## Motif #2 (87 sites)

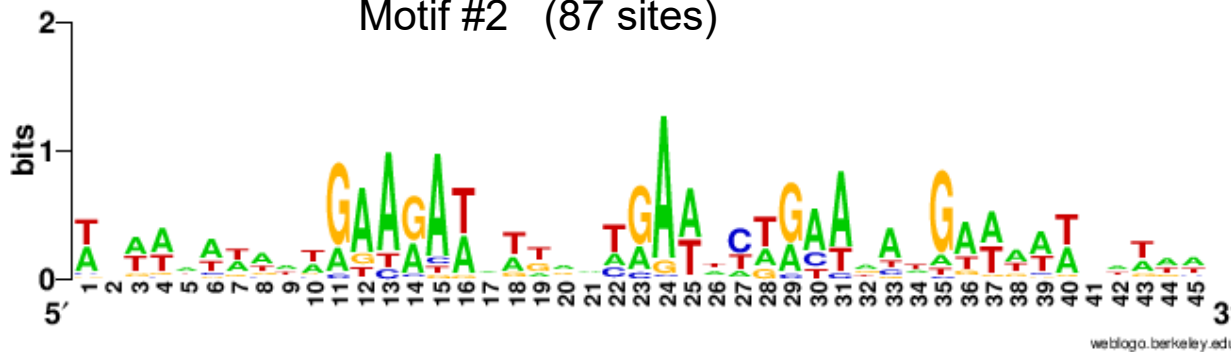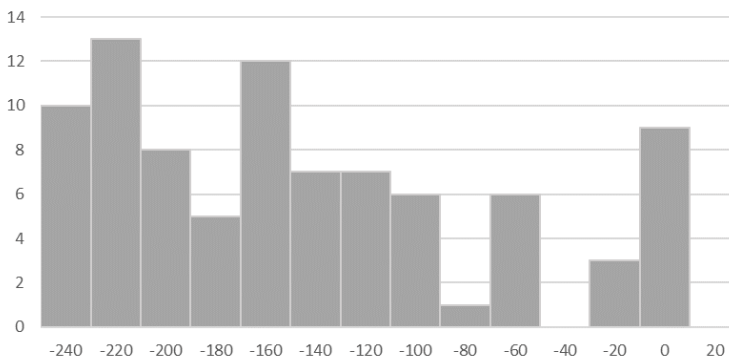

# LCDPAC02

386 fragments

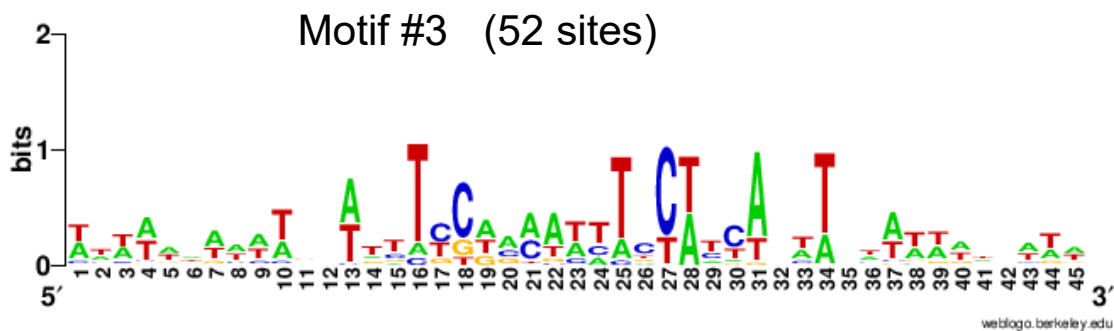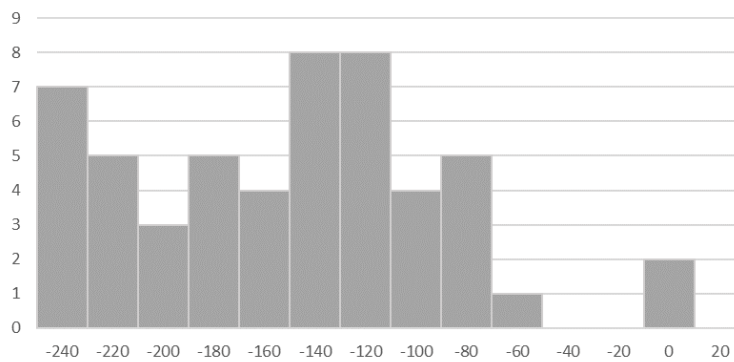

### Motif #6 (67 sites)

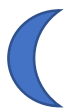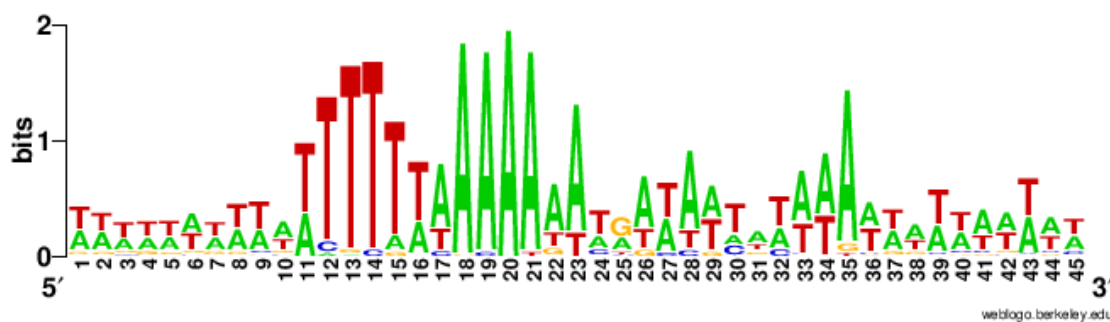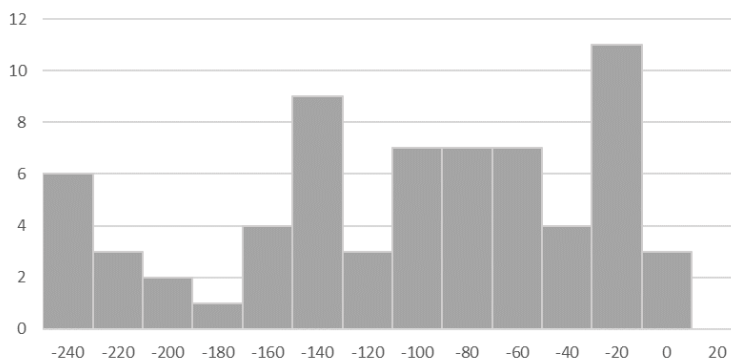

# All pithoviruses

7379 fragments



## Motif #2 (941 sites)

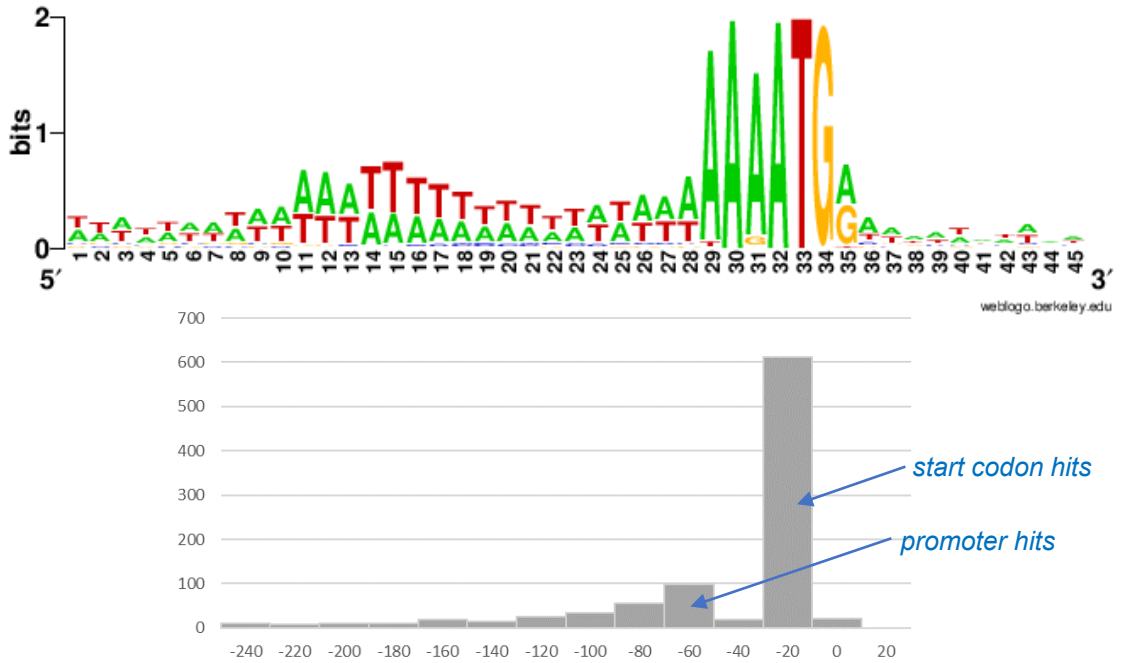

weblogo.berkeley.edu

start codon hits

promoter hits

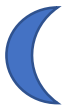

## Motif #5 (1510 sites)

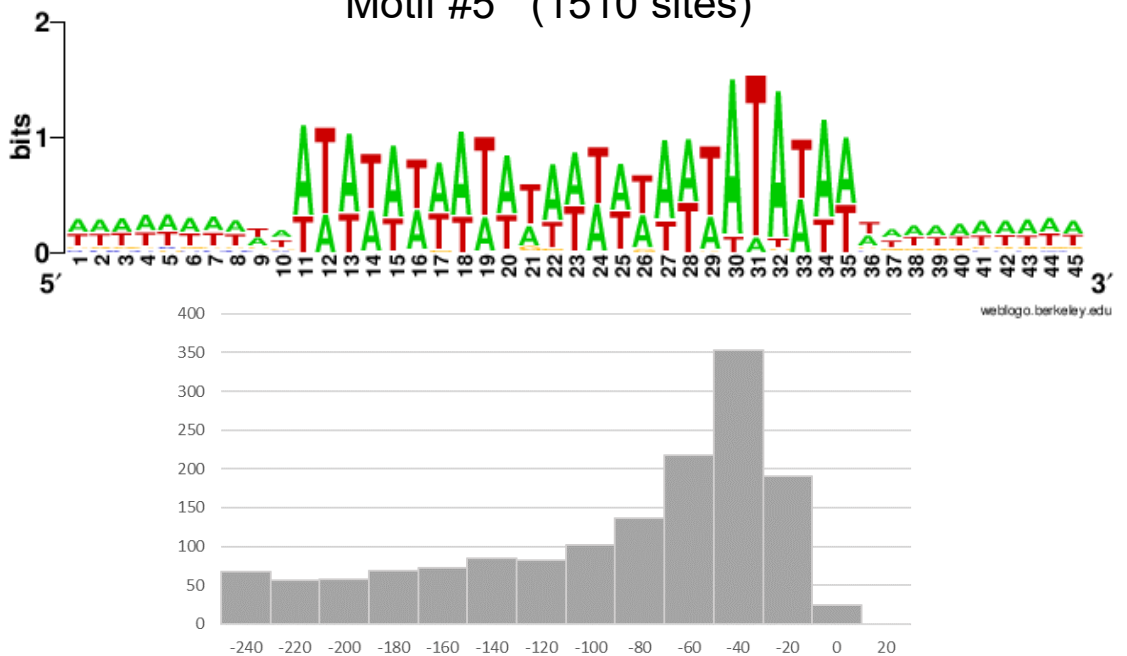

weblogo.berkeley.edu
